# Supplementary material for: TAF4 Inactivation Reveals the 3 Dimensional Growth Promoting Activities of Collagen 6A3
Source: PubMed Central journal article supplement (PMC3911972; doi:10.1371/journal.pone.0087365), 2014-02-03

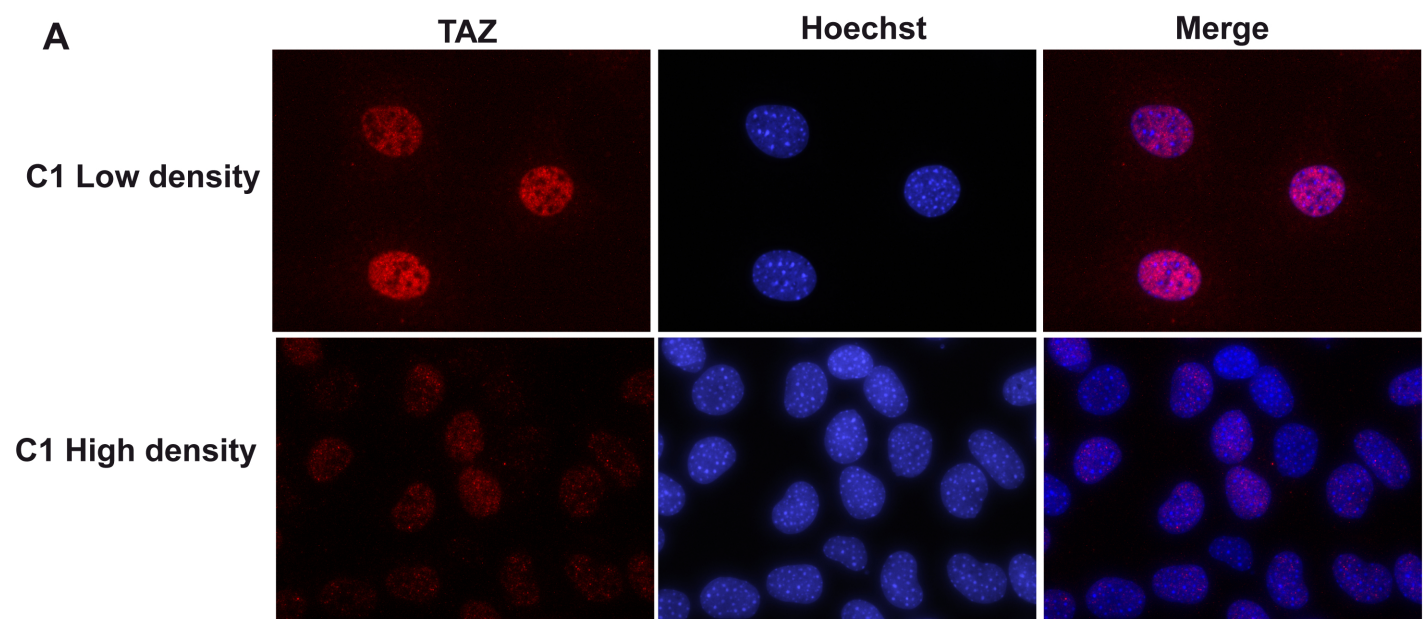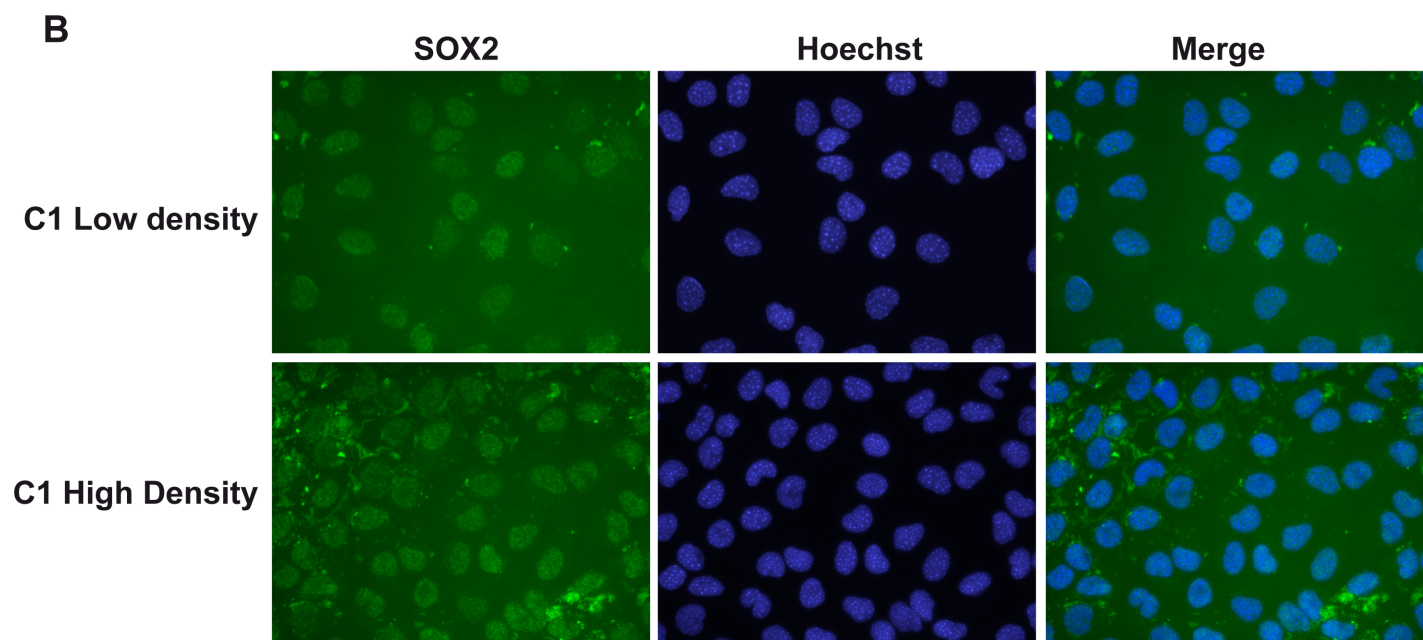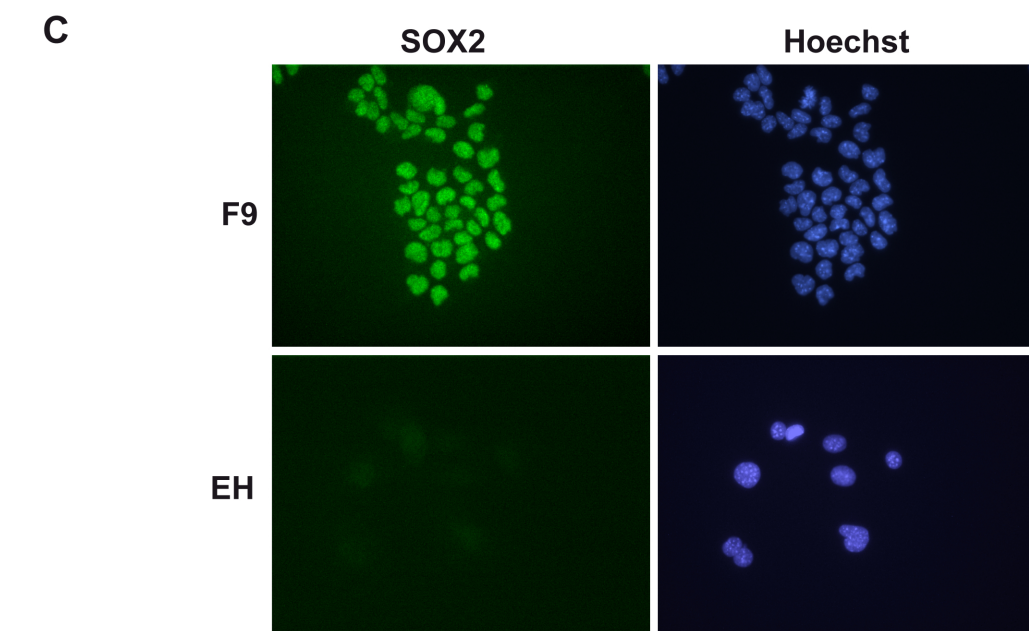

Supplement: pone.0087365.s001.pdf [file pone.0087365.s001.pdf]
