# Supplementary material for: TAF4 Inactivation Reveals the 3 Dimensional Growth Promoting Activities of Collagen 6A3
Source: PubMed Central journal article supplement (PMC3911972; doi:10.1371/journal.pone.0087365), 2014-02-03
Supplement: pone.0087365.s003.pdf [file pone.0087365.s003.pdf]

**A**

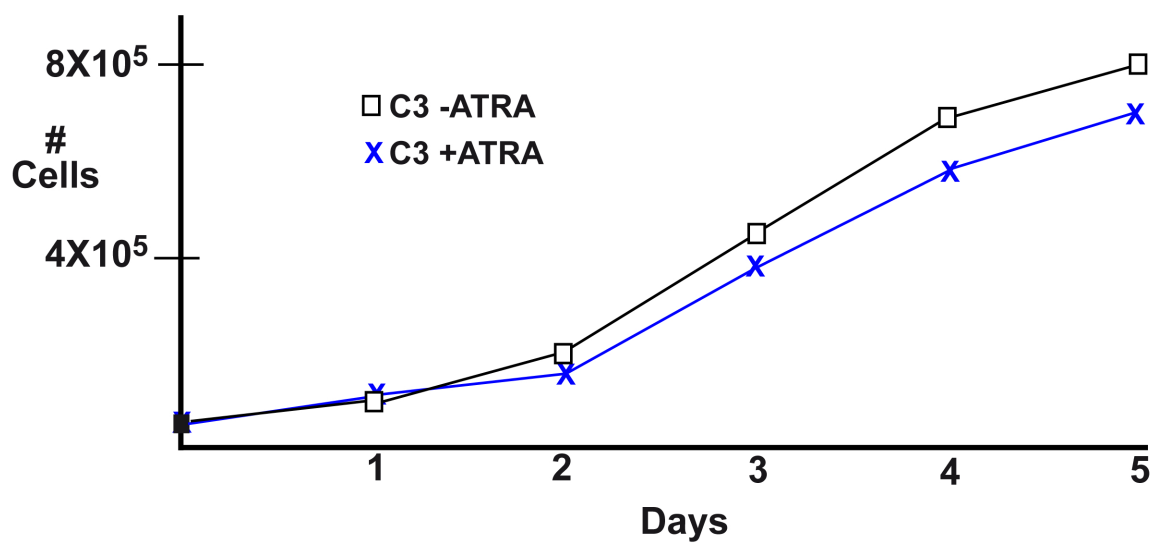

**B**

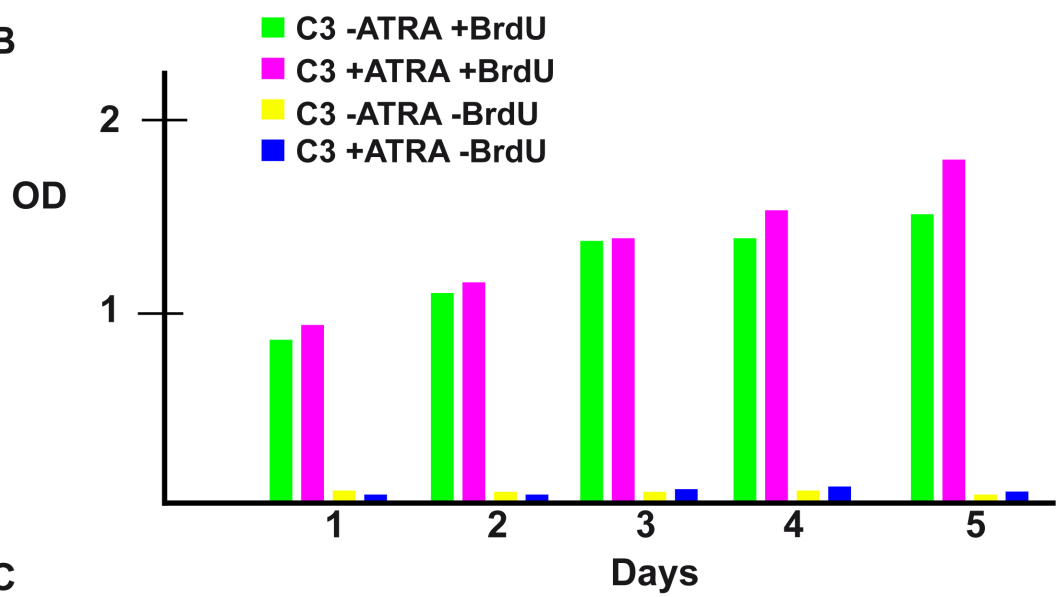

**C**

|       |    | G1 | S  | G2 |
|-------|----|----|----|----|
| -ATRA | 24 | 46 | 26 | 26 |
|       | 48 | 59 | 20 | 19 |
| +ATRA | 24 | 49 | 19 | 28 |
|       | 48 | 56 | 23 | 19 |
