# Supplementary material for: TAF4 Inactivation Reveals the 3 Dimensional Growth Promoting Activities of Collagen 6A3
Source: PubMed Central journal article supplement (PMC3911972; doi:10.1371/journal.pone.0087365), 2014-02-03
Supplement: pone.0087365.s005.pdf [file pone.0087365.s005.pdf]

**A****C3 + shCo/6a3-1 low density****TAZ****Hoechst**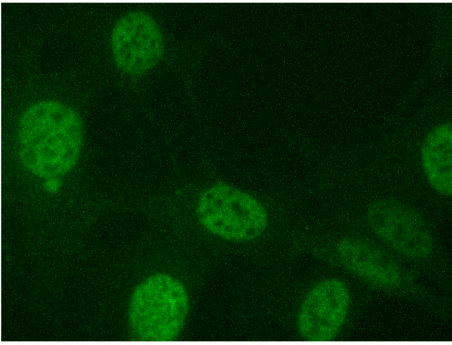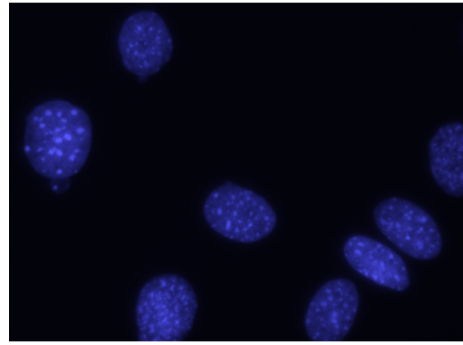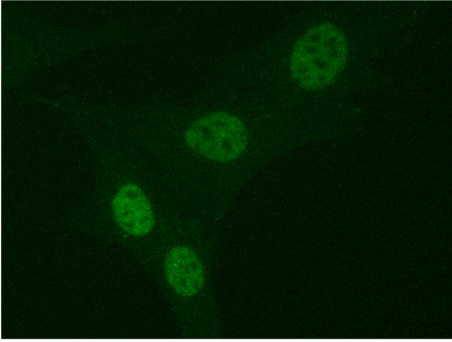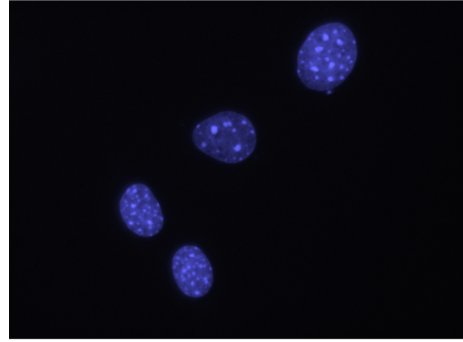**C3 + shCo/6a3-2 low density****B****C3 + shCo/6a3-1 high density****TAZ****Hoechst**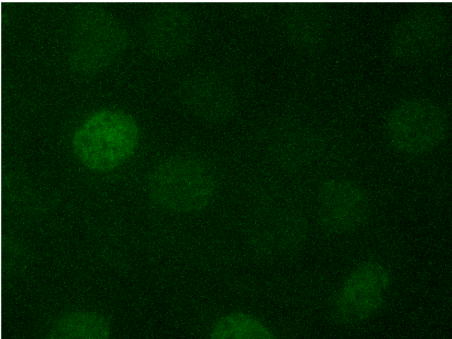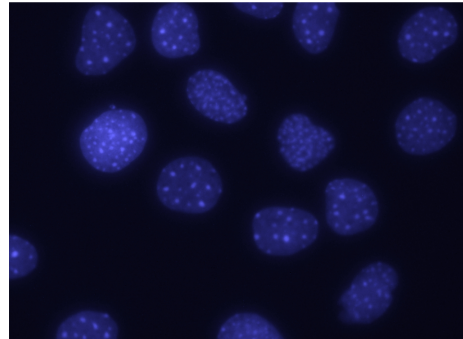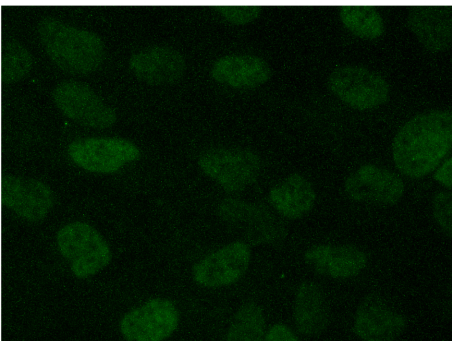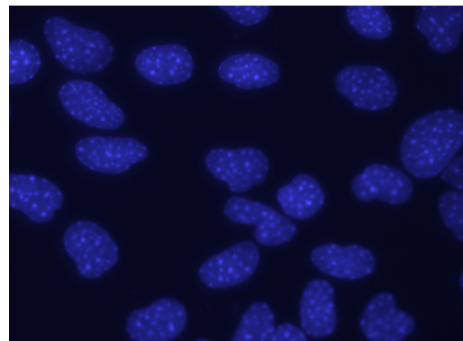**C3 + shCo/6a3-2 high density**
