# Supplementary material for: TAF4 Inactivation Reveals the 3 Dimensional Growth Promoting Activities of Collagen 6A3
Source: PLoS One. 2014 Feb 3;9(2):e87365. doi: 10.1371/journal.pone.0087365 (PMC3911972; doi:10.1371/journal.pone.0087365)
Supplement: Table S3 — Ontology analyses of genes whose expression is modified under conditions of dense or 3D growth. Each page shows the analysis of genes differentially regulated under the specified conditions with the indicated ontology terms. (XLS) [file pone.0087365.s008.xls]

## Sheet: BP-FAT-Up-in -dense
Category	Term	Count	%	PValue	Genes	List Total	Pop Hits	Pop Total	Fold Enrichment	Bonferroni	Benjamini	FDR
GOTERM_BP_FAT	GO:0007242~intracellular signaling cascade	35	5.617977528089887	0.09715583053399549	FGF8, RAB3D, RGL3, MKNK2, TGFB3, LPAR1, TENC1, CALCOCO1, RGL1, DGKA, MAP3K5, AGTR2, WNK4, TGM2, RAPGEF3, ERRFI1, CDC42EP5, NET1, PDK1, AR, VAV3, SOCS2, BAIAP2, ARHGEF19, NPR1, MINK1, STK3, RALGDS, RND2, TYK2, PLCE1, NUPR1, SYNGAP1, ARL4A, IFI204	402	915	13588	1.2929342359242042	1.0	0.7635609228427203	82.6268672852847
GOTERM_BP_FAT	GO:0006793~phosphorus metabolic process	34	5.457463884430177	0.07858742442783079	MVD, MKNK2, TGFB3, LPAR1, TRIB2, DMPK, ACVR1B, MAP3K5, EPHB6, SNRK, VRK3, WNK4, LMTK3, CAMK2B, PPP3CA, INSR, EGFR, PDK1, TCIRG1, PDK2, PTPRD, NPR1, MINK1, PTPDC1, STK3, TYK2, IKBKE, PLCE1, DYRK1B, PDGFRA, NEK8, TGFBR3, MERTK, MYLK	402	866	13588	1.3270598508611677	1.0	0.7353915390992871	75.38021507307866
GOTERM_BP_FAT	GO:0006796~phosphate metabolic process	34	5.457463884430177	0.07858742442783079	MVD, MKNK2, TGFB3, LPAR1, TRIB2, DMPK, ACVR1B, MAP3K5, EPHB6, SNRK, VRK3, WNK4, LMTK3, CAMK2B, PPP3CA, INSR, EGFR, PDK1, TCIRG1, PDK2, PTPRD, NPR1, MINK1, PTPDC1, STK3, TYK2, IKBKE, PLCE1, DYRK1B, PDGFRA, NEK8, TGFBR3, MERTK, MYLK	402	866	13588	1.3270598508611677	1.0	0.7353915390992871	75.38021507307866
GOTERM_BP_FAT	GO:0006955~immune response	33	5.296950240770466	1.020132332898355E-5	CPLX2, ENPP1, C3, ENPP2, FCGRT, CX3CL1, C1S, OAS2, CCL5, CXCL10, CFP, C1RA, TMEM173, SQSTM1, TAP2, OASL2, OASL1, LBP, MX1, MX2, TRPM4, IL1RN, H2-GS10, COLEC12, DDX58, GM5077, IRF7, OAS1B, OAS1C, H2-T23, OAS1A, H2-DMA, OAS1G	402	471	13588	2.3682225813607123	0.019526105691052065	0.019526105691052065	0.017468123159170013
GOTERM_BP_FAT	GO:0016310~phosphorylation	31	4.975922953451043	0.03500275417171273	MVD, MKNK2, TGFB3, LPAR1, TRIB2, DMPK, ACVR1B, MAP3K5, EPHB6, SNRK, VRK3, WNK4, LMTK3, CAMK2B, INSR, EGFR, PDK1, TCIRG1, PDK2, NPR1, MINK1, STK3, TYK2, IKBKE, PLCE1, DYRK1B, NEK8, PDGFRA, TGFBR3, MERTK, MYLK	402	718	13588	1.4593744370071646	1.0	0.6157905295404074	45.6734478036296
GOTERM_BP_FAT	GO:0042127~regulation of cell proliferation	30	4.815409309791333	0.0013099528593050712	SAT1, FGF8, PTGS1, TGFB3, CXCL10, H19, OSR2, CDKN2A, HOXA3, CDKN2B, GATA3, TGM2, FLT3L, AXIN2, COL18A1, CEBPA, EGFR, AR, TBX5, SPHK1, IL11RA1, GAS1, KITL, NTN1, CDKN1A, NUPR1, SERPINF1, GRN, TGFBR3, KLF4	402	538	13588	1.8848138489707593	0.9206430157893687	0.24537413983733614	2.2197315636597104
GOTERM_BP_FAT	GO:0007155~cell adhesion	30	4.815409309791333	0.002493350810133236	CX3CL1, VCAM1, ALCAM, LGALS3BP, ARHGAP6, ITGB8, MSLN, TGFBI, COL6A2, COL6A1, ADAM8, CDH26, GPNMB, THBS2, SPP1, COL18A1, F11R, HAPLN4, NLGN2, KITL, PCDH19, BCL2L11, CDH13, LAMA4, SNED1, ITGA7, FBLN7, VCAN, ROM1, ITGA2B	402	561	13588	1.8075398409024395	0.9919787872900159	0.3311121056159223	4.185048932430069
GOTERM_BP_FAT	GO:0022610~biological adhesion	30	4.815409309791333	0.0025589315247386444	CX3CL1, VCAM1, ALCAM, LGALS3BP, ARHGAP6, ITGB8, MSLN, TGFBI, COL6A2, COL6A1, ADAM8, CDH26, GPNMB, THBS2, SPP1, COL18A1, F11R, HAPLN4, NLGN2, KITL, PCDH19, BCL2L11, CDH13, LAMA4, SNED1, ITGA7, FBLN7, VCAN, ROM1, ITGA2B	402	562	13588	1.8043235778403355	0.992936073515846	0.3168091941413663	4.292866341848455
GOTERM_BP_FAT	GO:0006468~protein amino acid phosphorylation	29	4.654895666131622	0.02455154845108907	MKNK2, TGFB3, LPAR1, TRIB2, DMPK, ACVR1B, MAP3K5, EPHB6, SNRK, VRK3, WNK4, LMTK3, CAMK2B, INSR, EGFR, PDK1, PDK2, NPR1, MINK1, STK3, TYK2, IKBKE, PLCE1, DYRK1B, NEK8, PDGFRA, TGFBR3, MERTK, MYLK	402	640	13588	1.5316075870646766	1.0	0.5961097666844956	34.66795903412924
GOTERM_BP_FAT	GO:0042981~regulation of apoptosis	28	4.49438202247191	0.007317721654246988	FGF8, GDF5, TGFB3, FOXO3, CX3CL1, ITM2B, CRADD, AGTR2, CDKN2A, CASP4, APOE, MTCH1, TGM2, TRP53INP1, BMF, DEDD2, SPP1, COL18A1, TBX5, SPHK1, GAS1, KITL, BCL2L11, STK3, CDKN1A, NUPR1, SYNGAP1, IFI204	402	553	13588	1.7114427860696517	0.9999993172690611	0.3770187351824007	11.818699772745756
GOTERM_BP_FAT	GO:0043067~regulation of programmed cell death	28	4.49438202247191	0.00852030867245108	FGF8, GDF5, TGFB3, FOXO3, CX3CL1, ITM2B, CRADD, AGTR2, CDKN2A, CASP4, APOE, MTCH1, TGM2, TRP53INP1, BMF, DEDD2, SPP1, COL18A1, TBX5, SPHK1, GAS1, KITL, BCL2L11, STK3, CDKN1A, NUPR1, SYNGAP1, IFI204	402	560	13588	1.690049751243781	0.9999999344414026	0.3766085417676188	13.630338294038502
GOTERM_BP_FAT	GO:0010941~regulation of cell death	28	4.49438202247191	0.009176904705484594	FGF8, GDF5, TGFB3, FOXO3, CX3CL1, ITM2B, CRADD, AGTR2, CDKN2A, CASP4, APOE, MTCH1, TGM2, TRP53INP1, BMF, DEDD2, SPP1, COL18A1, TBX5, SPHK1, GAS1, KITL, BCL2L11, STK3, CDKN1A, NUPR1, SYNGAP1, IFI204	402	563	13588	1.6810441575426596	0.9999999817819426	0.39044352872878085	14.604618447971497
GOTERM_BP_FAT	GO:0012501~programmed cell death	24	3.8523274478330656	0.013446967720717903	1810011O10RIK, FGF8, YPEL3, GAS2, GAS1, ITM2B, KITL, PDCD4, NTN1, DNASE2A, STK3, CRADD, BCL2L11, DDIT4, MAP3K5, TMEM173, CDKN2A, CASP4, SQSTM1, MTCH1, TRP53INP1, XAF1, BMF, DEDD2	402	473	13588	1.7150610583446404	0.9999999999956868	0.45588201924768945	20.69261109389886
GOTERM_BP_FAT	GO:0008219~cell death	24	3.8523274478330656	0.027459972731792546	1810011O10RIK, FGF8, YPEL3, GAS2, GAS1, ITM2B, KITL, PDCD4, NTN1, DNASE2A, STK3, CRADD, BCL2L11, DDIT4, MAP3K5, TMEM173, CDKN2A, CASP4, SQSTM1, MTCH1, TRP53INP1, XAF1, BMF, DEDD2	402	507	13588	1.6000471017692601	1.0	0.5744300805862825	37.924800652585766
GOTERM_BP_FAT	GO:0016265~death	24	3.8523274478330656	0.03471050197789381	1810011O10RIK, FGF8, YPEL3, GAS2, GAS1, ITM2B, KITL, PDCD4, NTN1, DNASE2A, STK3, CRADD, BCL2L11, DDIT4, MAP3K5, TMEM173, CDKN2A, CASP4, SQSTM1, MTCH1, TRP53INP1, XAF1, BMF, DEDD2	402	519	13588	1.5630517930578323	1.0	0.6177942226161439	45.39100530056211
GOTERM_BP_FAT	GO:0006915~apoptosis	22	3.5313001605136436	0.03521870856991426	1810011O10RIK, FGF8, YPEL3, GAS2, ITM2B, PDCD4, NTN1, DNASE2A, STK3, CRADD, BCL2L11, DDIT4, MAP3K5, TMEM173, CDKN2A, CASP4, SQSTM1, MTCH1, TRP53INP1, XAF1, BMF, DEDD2	402	465	13588	1.5991868613919649	1.0	0.6130230513947605	45.88126915762001
GOTERM_BP_FAT	GO:0043009~chordate embryonic development	21	3.3707865168539324	0.02513966715299196	CEBPA, EGFR, AR, FGF8, IFITM1, TGFB3, GAS1, SIX4, BCL2L11, VCAM1, ACVR1B, RDH10, OSR2, HOXA3, HOXA5, GRN, HOXA7, PDGFRA, TGFBR3, WNT9A, AXIN2	402	421	13588	1.6860353812883326	1.0	0.5782922910533226	35.33923721089889
GOTERM_BP_FAT	GO:0009792~embryonic development ending in birth or egg hatching	21	3.3707865168539324	0.027313954317423193	CEBPA, EGFR, AR, FGF8, IFITM1, TGFB3, GAS1, SIX4, BCL2L11, VCAM1, ACVR1B, RDH10, OSR2, HOXA3, HOXA5, GRN, HOXA7, PDGFRA, TGFBR3, WNT9A, AXIN2	402	425	13588	1.670166812993854	1.0	0.5782846872299491	37.765003325499215
GOTERM_BP_FAT	GO:0001501~skeletal system development	20	3.210272873194221	8.207073231538332E-4	BMP1, HEXA, HEXB, TGFB3, MGP, GAS1, SIX4, MMP2, RDH10, OSR2, HOXA3, HOXA5, HOXA7, INSIG1, PDGFRA, WNT9A, AXIN2, GPNMB, CHRD, SPP1	402	285	13588	2.371999650868465	0.7954777706224114	0.23242040755200466	1.3961834173940146
GOTERM_BP_FAT	GO:0048598~embryonic morphogenesis	20	3.210272873194221	0.010371874401527596	FGF8, MYO6, MYO7A, TBX5, GDF5, CRABP2, C630004H02RIK, TGFB3, GAS1, SIX4, VCAM1, RDH10, OSR2, HOXA3, HOXA5, HOXA7, INSIG1, WNT9A, CHRD, LRP4	402	359	13588	1.8830637896866644	0.9999999982321995	0.41997843424315284	16.351256321037056
GOTERM_BP_FAT	GO:0016192~vesicle-mediated transport	20	3.210272873194221	0.09702459826367671	ABCA7, CPLX2, MYO6, VAV3, GNPDA1, GM8615, RAB3D, MYO7A, MRC2, USE1, COLEC12, ABCA1, LRP1, RIN2, LBP, MERTK, VAMP1, SCARA5, DNM1, LRP4, EPN2	402	466	13588	1.4506864817543186	1.0	0.7655709553934608	82.58357201455078
GOTERM_BP_FAT	GO:0007167~enzyme linked receptor protein signaling pathway	19	3.0497592295345104	0.0012699552589224704	PLAT, TXNIP, EGFR, FGF8, LTBP4, GDF6, TGFB3, EPHB6, PDGFRA, GFRA1, TGFBR3, ANGPT1, AGRN, SYNGAP1, INSR, GIGYF1, ARAP1, LRP4, PIK3R2	402	273	13588	2.352450203196472	0.9142555222540523	0.2643846721852414	2.152647381219741
GOTERM_BP_FAT	GO:0006928~cell motion	19	3.0497592295345104	0.024755340286096612	PLAT, EGFR, PLXNA3, VAV3, GAS1, CX3CL1, SIX4, KITL, NTN1, ALCAM, SEMA5A, SEMA6C, TNS1, NAV1, ROBO1, PLEKHG5, ETV1, LBP, NR2F1	402	367	13588	1.7499152737674029	1.0	0.5790561785399423	34.90130632326286
GOTERM_BP_FAT	GO:0007610~behavior	18	2.889245585874799	0.09146939504244786	PLXNA3, MYO6, ENPP2, HEXA, HEXB, CX3CL1, CCL5, CXCL10, BBS2, AGTR2, EPS8, ROBO1, GAA, PHF21A, ETV1, LBP, SEPP1, SYNGAP1	402	405	13588	1.5022664455500276	1.0	0.7571880705180407	80.65479137840832
GOTERM_BP_FAT	GO:0048568~embryonic organ development	17	2.7287319422150884	0.0021655221945935258	CEBPA, EGFR, FGF8, MYO6, MYO7A, TGFB3, C630004H02RIK, GAS1, SIX4, VCAM1, RDH10, OSR2, HOXA3, HOXA5, HOXA7, INSIG1, WNT9A	402	241	13588	2.3843025536219318	0.9848611856234356	0.31679064277385305	3.644368163645173
GOTERM_BP_FAT	GO:0016044~membrane organization	17	2.7287319422150884	0.0069587600590550625	ABCA7, A4GALT, MYO6, VAV3, MYO7A, MRC2, COLEC12, ABCA1, LRP1, RIN2, LBP, AGRN, MERTK, SCARA5, LRP4, DNM1, EPN2	402	272	13588	2.1125621890547266	0.9999986267132215	0.38250374224892125	11.271045748406117
GOTERM_BP_FAT	GO:0001568~blood vessel development	16	2.568218298555377	0.005976223720766441	COL18A1, FGF8, COL3A1, SPHK1, CX3CL1, MMP2, SEMA5A, ZFP36L1, LAMA4, HOXA3, APOE, ITGA7, TGM2, TGFBR3, ANGPT1, PLXND1	402	244	13588	2.2164586901557786	0.9999907111647405	0.3829338557740978	9.755601282871073
GOTERM_BP_FAT	GO:0043068~positive regulation of programmed cell death	16	2.568218298555377	0.007377668202314278	COL18A1, TBX5, TGFB3, FOXO3, ITM2B, STK3, BCL2L11, CDKN1A, CDKN2A, CASP4, NUPR1, APOE, MTCH1, TGM2, TRP53INP1, IFI204	402	250	13588	2.16326368159204	0.9999993924913367	0.36981300763997627	11.909847202474321
GOTERM_BP_FAT	GO:0001944~vasculature development	16	2.568218298555377	0.007377668202314278	COL18A1, FGF8, COL3A1, SPHK1, CX3CL1, MMP2, SEMA5A, ZFP36L1, LAMA4, HOXA3, APOE, ITGA7, TGM2, TGFBR3, ANGPT1, PLXND1	402	250	13588	2.16326368159204	0.9999993924913367	0.36981300763997627	11.909847202474321
GOTERM_BP_FAT	GO:0010942~positive regulation of cell death	16	2.568218298555377	0.00795105365218749	COL18A1, TBX5, TGFB3, FOXO3, ITM2B, STK3, BCL2L11, CDKN1A, CDKN2A, CASP4, NUPR1, APOE, MTCH1, TGM2, TRP53INP1, IFI204	402	252	13588	2.146094922214325	0.9999998011696608	0.3648203895052876	12.7771964722162
GOTERM_BP_FAT	GO:0042325~regulation of phosphorylation	16	2.568218298555377	0.025447403203295457	EGFR, VAV3, SPHK1, TGFB3, LPAR1, KITL, PDCD4, SPRY4, TRIB2, DGKA, MAP3K5, PLCE1, CDKN1A, CDKN2A, RAPGEF3, PIK3R2	402	290	13588	1.864882484131069	1.0	0.5764476402973447	35.68789333099682
GOTERM_BP_FAT	GO:0019220~regulation of phosphate metabolic process	16	2.568218298555377	0.03381078327805166	EGFR, VAV3, SPHK1, TGFB3, LPAR1, KITL, PDCD4, SPRY4, TRIB2, DGKA, MAP3K5, PLCE1, CDKN1A, CDKN2A, RAPGEF3, PIK3R2	402	301	13588	1.796730632551528	1.0	0.6131853257370181	44.51278094812792
GOTERM_BP_FAT	GO:0051174~regulation of phosphorus metabolic process	16	2.568218298555377	0.03381078327805166	EGFR, VAV3, SPHK1, TGFB3, LPAR1, KITL, PDCD4, SPRY4, TRIB2, DGKA, MAP3K5, PLCE1, CDKN1A, CDKN2A, RAPGEF3, PIK3R2	402	301	13588	1.796730632551528	1.0	0.6131853257370181	44.51278094812792
GOTERM_BP_FAT	GO:0030030~cell projection organization	16	2.568218298555377	0.05162049157485356	PLXNA3, MYO6, VAV3, BAIAP2, MYO7A, DYNC2LI1, GAS1, LPAR1, NTN1, ALCAM, SEMA5A, BBS2, SEMA6C, ROBO1, ETV1, SYNGAP1	402	319	13588	1.695347712846426	1.0	0.6637478346061647	59.651799271912594
GOTERM_BP_FAT	GO:0051094~positive regulation of developmental process	15	2.4077046548956664	0.0045423348700623705	SOCS2, TBX5, GDF5, TGFB3, FOXO3, CX3CL1, KITL, NTN1, ADAMTS9, CDKN2A, SERPINF1, MNDA, WNT9A, H2-DMA, IFI204	402	214	13588	2.3692286232389455	0.9998493174881243	0.3559743826986369	7.500206066212489
GOTERM_BP_FAT	GO:0008285~negative regulation of cell proliferation	15	2.4077046548956664	0.006746085785238016	CEBPA, AR, TBX5, TGFB3, GAS1, H19, CDKN1A, CDKN2A, SERPINF1, NUPR1, CDKN2B, GATA3, TGFBR3, AXIN2, KLF4	402	224	13588	2.263459488272921	0.9999979225466112	0.3840603018418546	10.945067562443722
GOTERM_BP_FAT	GO:0051056~regulation of small GTPase mediated signal transduction	15	2.4077046548956664	0.007832918294544355	VAV3, ARHGEF19, RGL3, LPAR1, KITL, RALGDS, RGL1, PLCE1, PSD, PLEKHG5, GRTP1, RAPGEF3, FGD6, ARAP1, NET1	402	228	13588	2.2237496726891854	0.9999997497090463	0.3691111043147872	12.59915576743863
GOTERM_BP_FAT	GO:0043065~positive regulation of apoptosis	15	2.4077046548956664	0.015547767507274077	COL18A1, TBX5, TGFB3, FOXO3, ITM2B, STK3, BCL2L11, CDKN2A, CASP4, NUPR1, APOE, MTCH1, TGM2, TRP53INP1, IFI204	402	248	13588	2.044415021665864	0.99999999999993	0.48988002226492056	23.535522299338083
GOTERM_BP_FAT	GO:0008284~positive regulation of cell proliferation	15	2.4077046548956664	0.04262240027543102	EGFR, COL18A1, FGF8, SPHK1, IL11RA1, GAS1, NTN1, KITL, CXCL10, CDKN1A, OSR2, HOXA3, GRN, TGM2, FLT3L	402	284	13588	1.7852638217363883	1.0	0.6509205248502024	52.569829647197544
GOTERM_BP_FAT	GO:0048562~embryonic organ morphogenesis	14	2.247191011235955	9.753748753105829E-4	FGF8, MYO6, MYO7A, TGFB3, C630004H02RIK, SIX4, GAS1, RDH10, HOXA3, OSR2, HOXA5, HOXA7, INSIG1, WNT9A	402	161	13588	2.9392169586848365	0.8483711799582101	0.2362190498826472	1.6572390346352939
GOTERM_BP_FAT	GO:0045596~negative regulation of cell differentiation	14	2.247191011235955	0.0029259544584242392	PLXNA3, ZCCHC11, ENPP1, NTN1, HOXA7, INSIG1, CLEC2D, TGFBR3, MBNL3, WNT9A, AXIN2, SYNGAP1, CHRD, KLF4	402	182	13588	2.600076540375048	0.9965319421980506	0.33274493284655704	4.8941616093386875
GOTERM_BP_FAT	GO:0006897~endocytosis	14	2.247191011235955	0.0038640387600423847	ABCA7, MYO6, MYO7A, MRC2, COLEC12, ABCA1, LRP1, RIN2, LBP, MERTK, SCARA5, LRP4, DNM1, EPN2	402	188	13588	2.5170953741928654	0.9994378010790054	0.35610202499804355	6.414904947842914
GOTERM_BP_FAT	GO:0010324~membrane invagination	14	2.247191011235955	0.0038640387600423847	ABCA7, MYO6, MYO7A, MRC2, COLEC12, ABCA1, LRP1, RIN2, LBP, MERTK, SCARA5, LRP4, DNM1, EPN2	402	188	13588	2.5170953741928654	0.9994378010790054	0.35610202499804355	6.414904947842914
GOTERM_BP_FAT	GO:0007169~transmembrane receptor protein tyrosine kinase signaling pathway	14	2.247191011235955	0.004614918724334461	PLAT, TXNIP, EGFR, FGF8, EPHB6, PDGFRA, GFRA1, ANGPT1, AGRN, SYNGAP1, INSR, LRP4, GIGYF1, PIK3R2	402	192	13588	2.4646558872305144	0.9998691272986443	0.3467370153258654	7.615638581158734
GOTERM_BP_FAT	GO:0051338~regulation of transferase activity	14	2.247191011235955	0.006168183173405081	VAV3, SPHK1, TGFB3, LPAR1, PDCD4, KITL, SPRY4, TRIB2, DGKA, MAP3K5, PLCE1, CDKN1A, SERINC5, CDKN2A	402	199	13588	2.377959448986225	0.9999936051777233	0.38022630557796633	10.053578041260636
GOTERM_BP_FAT	GO:0007389~pattern specification process	14	2.247191011235955	0.07872042427804912	FGF8, IFITM1, TBX5, DYNC2LI1, GAS1, SEMA5A, HOXA3, HOXA5, HOXA7, AXIN2, PLXND1, SYNGAP1, CHRD, LRP4	402	284	13588	1.6662462336206292	1.0	0.7330650147247522	75.44100076780651
GOTERM_BP_FAT	GO:0045597~positive regulation of cell differentiation	13	2.086677367576244	0.0057725266823441595	SOCS2, TBX5, GDF5, TGFB3, FOXO3, NTN1, KITL, ADAMTS9, SERPINF1, MNDA, WNT9A, H2-DMA, IFI204	402	175	13588	2.51093105899076	0.9999861969963035	0.39870206928053475	9.438388030808454
GOTERM_BP_FAT	GO:0043549~regulation of kinase activity	13	2.086677367576244	0.011673721645061752	VAV3, SPHK1, TGFB3, LPAR1, PDCD4, KITL, SPRY4, TRIB2, DGKA, PLCE1, CDKN1A, MAP3K5, CDKN2A	402	192	13588	2.2886090381426203	0.9999999998612086	0.4412210070454444	18.215801324343694
GOTERM_BP_FAT	GO:0040007~growth	13	2.086677367576244	0.01212799635397659	PLAG1, AR, GDF6, GDF5, TGFB3, GAS1, FOXO3, TENC1, RDH10, HOXA5, TGFBR3, SEPP1, LRP4	402	193	13588	2.2767509602247826	0.9999999999429298	0.4296978634140214	18.857165071336336
GOTERM_BP_FAT	GO:0007626~locomotory behavior	13	2.086677367576244	0.05139599859676834	PLXNA3, MYO6, ENPP2, HEXA, HEXB, CX3CL1, CCL5, CXCL10, EPS8, ROBO1, GAA, LBP, SEPP1	402	239	13588	1.8385478465413518	1.0	0.6660265332211456	59.48792934524675
GOTERM_BP_FAT	GO:0006873~cellular ion homeostasis	13	2.086677367576244	0.08635704634429017	TRPM4, SCD2, HEXA, HEXB, CKB, DMPK, SERINC5, APOE, WNK4, TGM2, PPP3CA, CHRNB1, SCARA5, GM12892	402	261	13588	1.683574464840548	1.0	0.7525725169814099	78.70362670216318
GOTERM_BP_FAT	GO:0043085~positive regulation of catalytic activity	13	2.086677367576244	0.08635704634429017	VAV3, SPHK1, TGFB3, LPAR1, KITL, DGKA, PLCE1, AGTR2, ARHGAP6, SERINC5, MAP3K5, MTCH1, TGM2	402	261	13588	1.683574464840548	1.0	0.7525725169814099	78.70362670216318
GOTERM_BP_FAT	GO:0035295~tube development	13	2.086677367576244	0.09205344175181512	CEBPA, FGF8, AR, TBX5, TGFB3, MGP, BCL2L11, SEMA5A, RDH10, HOXA5, PDGFRA, TGM2, PLXND1	402	264	13588	1.6644429368309965	1.0	0.7568706549793591	80.86665551622603
GOTERM_BP_FAT	GO:0048705~skeletal system morphogenesis	12	1.9261637239165328	0.001616151715186346	RDH10, OSR2, HOXA3, HOXA5, HOXA7, INSIG1, TGFB3, PDGFRA, GAS1, SIX4, WNT9A, MMP2	402	130	13588	3.1200918484500573	0.9561310472100656	0.2684976481963133	2.73185694875957
GOTERM_BP_FAT	GO:0045859~regulation of protein kinase activity	12	1.9261637239165328	0.022232278055086502	DGKA, CDKN1A, MAP3K5, PLCE1, CDKN2A, SPHK1, TGFB3, LPAR1, KITL, PDCD4, SPRY4, TRIB2	402	186	13588	2.1807093564435887	1.0	0.5735051986322808	31.9562449195711
GOTERM_BP_FAT	GO:0048732~gland development	12	1.9261637239165328	0.03191207846828774	PLAG1, EGFR, AR, FGF8, HOXA3, SOCS2, HOXA5, TGFB3, TGM2, PLXND1, NTN1, BCL2L11	402	197	13588	2.0589438593832865	1.0	0.6188219623065059	42.6156024919182
GOTERM_BP_FAT	GO:0006954~inflammatory response	12	1.9261637239165328	0.07024614674231433	CFP, C1RA, GM5077, NUPR1, C3, SPHK1, PLA2G7, C1S, LBP, CCL5, CHST1, CXCL10	402	225	13588	1.802719734660033	1.0	0.7251855141706385	71.27181606790572
GOTERM_BP_FAT	GO:0070271~protein complex biogenesis	12	1.9261637239165328	0.07444521739689336	STOM, CBR2, C1QTNF1, SRR, TGM2, AGRN, H2-DMA, SYNGAP1, INSR, SCARA5, LRP4, LIPE	402	227	13588	1.7868367414031165	1.0	0.7306544600368439	73.41459638083758
GOTERM_BP_FAT	GO:0006461~protein complex assembly	12	1.9261637239165328	0.07444521739689336	STOM, CBR2, C1QTNF1, SRR, TGM2, AGRN, H2-DMA, SYNGAP1, INSR, SCARA5, LRP4, LIPE	402	227	13588	1.7868367414031165	1.0	0.7306544600368439	73.41459638083758
GOTERM_BP_FAT	GO:0007243~protein kinase cascade	12	1.9261637239165328	0.09110003840947055	TYK2, MAP3K5, AGTR2, PLCE1, FGF8, WNK4, TGFB3, MKNK2, MINK1, LPAR1, STK3, CDC42EP5	402	236	13588	1.7186946622818113	1.0	0.7583615197158061	80.51966837607945
GOTERM_BP_FAT	GO:0016477~cell migration	12	1.9261637239165328	0.09928628211885315	PLAT, EGFR, VAV3, TNS1, NAV1, PLEKHG5, CX3CL1, SIX4, LBP, KITL, NTN1, NR2F1	402	240	13588	1.690049751243781	1.0	0.7639667730751262	83.31570955691167
GOTERM_BP_FAT	GO:0046578~regulation of Ras protein signal transduction	11	1.7656500802568218	0.04231694797199685	PLCE1, VAV3, PSD, PLEKHG5, GRTP1, ARHGEF19, LPAR1, FGD6, KITL, ARAP1, NET1	402	181	13588	2.0542041175338777	1.0	0.6575180163019002	52.31001849925685
GOTERM_BP_FAT	GO:0048584~positive regulation of response to stimulus	11	1.7656500802568218	0.04930438765865244	CFP, C1RA, GM5077, CDKN2A, C3, TAP2, TGM2, UNC93B1, C1S, LBP, H2-DMA	402	186	13588	1.9989835767399562	1.0	0.6583647855187682	57.930732607177625
GOTERM_BP_FAT	GO:0005996~monosaccharide metabolic process	11	1.7656500802568218	0.057026052173677816	PDK1, PDK2, LDHB, GM5514, GNPDA1, GM8615, GNPDA2, PGM2L1, CSGALNACT1, MAN2A2, AMDHD2, GAA, DCXR	402	191	13588	1.9466541637362924	1.0	0.6896626013549344	63.41421122946649
GOTERM_BP_FAT	GO:0048514~blood vessel morphogenesis	11	1.7656500802568218	0.06904674244155724	ZFP36L1, COL18A1, SEMA5A, FGF8, HOXA3, APOE, ITGA7, TGM2, ANGPT1, CX3CL1, PLXND1	402	198	13588	1.8778330569375346	1.0	0.7221140941390757	70.6305266440716
GOTERM_BP_FAT	GO:0045087~innate immune response	10	1.6051364365971106	0.004358770094342089	DDX58, CFP, C1RA, GM5077, TMEM173, C3, C1S, LBP, MX1, MX2	402	107	13588	3.1589714976519274	0.9997847947943472	0.37443909615823356	7.207670572643099
GOTERM_BP_FAT	GO:0010876~lipid localization	10	1.6051364365971106	0.013557525852059115	SLC27A1, ABCA7, APOE, HEXA, HEXB, APOL9A, PITPNC1, ABCA1, APOL9B, LBP, PLTP	402	128	13588	2.640702736318408	0.9999999999965269	0.4510133227200199	20.844671802757063
GOTERM_BP_FAT	GO:0016042~lipid catabolic process	10	1.6051364365971106	0.017814818046377856	PLD3, PLCE1, ACADM, ENPP2, APOE, HEXA, HEXB, ABHD4, PLA2G7, LIPE	402	134	13588	2.522462315289226	0.9999999999999992	0.5225456036615563	26.495627871761982
GOTERM_BP_FAT	GO:0043062~extracellular structure organization	10	1.6051364365971106	0.03258823707724182	COL18A1, MYO6, SERAC1, OLFML2B, COL3A1, TGFBI, PDGFRA, NLGN2, AGRN, LRP4	402	149	13588	2.2685231560319212	1.0	0.6100743052097977	43.29811278067687
GOTERM_BP_FAT	GO:0060284~regulation of cell development	10	1.6051364365971106	0.04619853294859777	PLXNA3, CDKN2A, SOCS2, SERPINF1, TGFB3, TGFBR3, MBNL3, AGRN, SYNGAP1, NTN1	402	159	13588	2.1258487437028695	1.0	0.6632643228693698	55.514122062378114
GOTERM_BP_FAT	GO:0006917~induction of apoptosis	10	1.6051364365971106	0.05948522197120642	CASP4, NUPR1, APOE, TBX5, TGFB3, TGM2, TRP53INP1, FOXO3, ITM2B, IFI204	402	167	13588	2.0240116781362647	1.0	0.6872102878593299	65.01420919106351
GOTERM_BP_FAT	GO:0012502~induction of programmed cell death	10	1.6051364365971106	0.05948522197120642	CASP4, NUPR1, APOE, TBX5, TGFB3, TGM2, TRP53INP1, FOXO3, ITM2B, IFI204	402	167	13588	2.0240116781362647	1.0	0.6872102878593299	65.01420919106351
GOTERM_BP_FAT	GO:0009968~negative regulation of signal transduction	10	1.6051364365971106	0.06696281358498968	DKK2, LRP1, SOCS2, RGS2, RGS3, TGFB3, GAS1, CHRD, LRP4, DDIT4	402	171	13588	1.9766663757237206	1.0	0.7141014671970906	69.484136946257
GOTERM_BP_FAT	GO:0007517~muscle organ development	10	1.6051364365971106	0.07710707570102622	ACADM, MYL6B, TBX5, TGFBR3, ETV1, MKX, PPP3CA, AGRN, SIX4, LRP4	402	176	13588	1.9205110809588422	1.0	0.734385310626782	74.69400958634398
GOTERM_BP_FAT	GO:0045444~fat cell differentiation	9	1.4446227929373996	4.0187530561146604E-4	CEBPA, SCD1, BBS2, ALDH6A1, LAMA4, RGS2, BBS9, SELENBP1, ARL4A	402	61	13588	4.987032052850502	0.5402080162266588	0.17654409384897674	0.6859780122799974
GOTERM_BP_FAT	GO:0048704~embryonic skeletal system morphogenesis	9	1.4446227929373996	5.593393119299869E-4	RDH10, OSR2, HOXA3, HOXA5, HOXA7, TGFB3, GAS1, SIX4, WNT9A	402	64	13588	4.753264925373133	0.6609153108850212	0.19450724956047605	0.9535498485105598
GOTERM_BP_FAT	GO:0048706~embryonic skeletal system development	9	1.4446227929373996	0.003069533970502647	RDH10, OSR2, HOXA3, HOXA5, HOXA7, TGFB3, GAS1, SIX4, WNT9A	402	83	13588	3.6651681352274768	0.9973746321079896	0.3102378080982384	5.128419135462314
GOTERM_BP_FAT	GO:0043583~ear development	9	1.4446227929373996	0.011781739051714075	RDH10, FGF8, MYO6, MYO7A, INSIG1, C630004H02RIK, GAS1, SIX4, BCL2L11	402	104	13588	2.9250861079219286	0.9999999998876412	0.43601808862063174	18.368735876155196
GOTERM_BP_FAT	GO:0002252~immune effector process	9	1.4446227929373996	0.03310425007301565	CFP, C1RA, GM5077, CPLX2, C3, IRF7, C1S, LBP, H2-DMA	402	126	13588	2.4143567874911156	1.0	0.6105799160161174	43.813822822766156
GOTERM_BP_FAT	GO:0051347~positive regulation of transferase activity	9	1.4446227929373996	0.046679622689124504	DGKA, MAP3K5, SERINC5, PLCE1, VAV3, SPHK1, TGFB3, LPAR1, KITL	402	135	13588	2.2533996683250415	1.0	0.6628154862589425	55.89681506535684
GOTERM_BP_FAT	GO:0050778~positive regulation of immune response	9	1.4446227929373996	0.04838276169778477	CFP, C1RA, GM5077, C3, TAP2, UNC93B1, C1S, LBP, H2-DMA	402	136	13588	2.236830553116769	1.0	0.6594189123274865	57.22684823572459
GOTERM_BP_FAT	GO:0009615~response to virus	8	1.2841091492776886	0.007037438044794446	DDX58, ISG15, IFI27L2A, IRF7, OAS1B, OAS1A, MX1, MX2	402	76	13588	3.557999476302697	0.999998821726036	0.3754600608650809	11.391355094745048
GOTERM_BP_FAT	GO:0043405~regulation of MAP kinase activity	8	1.2841091492776886	0.01194632814681135	MAP3K5, PLCE1, TGFB3, LPAR1, KITL, PDCD4, SPRY4, TRIB2	402	84	13588	3.219142383321488	0.9999999999185714	0.4325581156349927	18.601248791927638
GOTERM_BP_FAT	GO:0035113~embryonic appendage morphogenesis	8	1.2841091492776886	0.024557514854942297	RDH10, FGF8, TBX5, CRABP2, GDF5, GAS1, WNT9A, LRP4	402	97	13588	2.787710929886649	1.0	0.5893614843259369	34.67480190876272
GOTERM_BP_FAT	GO:0030326~embryonic limb morphogenesis	8	1.2841091492776886	0.024557514854942297	RDH10, FGF8, TBX5, CRABP2, GDF5, GAS1, WNT9A, LRP4	402	97	13588	2.787710929886649	1.0	0.5893614843259369	34.67480190876272
GOTERM_BP_FAT	GO:0022604~regulation of cell morphogenesis	8	1.2841091492776886	0.024557514854942297	PLXNA3, ITGA7, TGFB3, TGFBR3, GAS2, SYNGAP1, NTN1, CDC42EP5	402	97	13588	2.787710929886649	1.0	0.5893614843259369	34.67480190876272
GOTERM_BP_FAT	GO:0007411~axon guidance	8	1.2841091492776886	0.025802389128567135	ALCAM, SEMA5A, PLXNA3, SEMA6C, ROBO1, ETV1, GAS1, NTN1	402	98	13588	2.7592648999898466	1.0	0.5753345749125314	36.08788328588959
GOTERM_BP_FAT	GO:0051270~regulation of cell motion	8	1.2841091492776886	0.03898072858807105	COL18A1, BBS2, LAMA4, PLXNA3, TBX5, TGFBR3, NTN1, CXCL10	402	107	13588	2.527177198121542	1.0	0.6411205650846026	49.38367056668932
GOTERM_BP_FAT	GO:0030324~lung development	8	1.2841091492776886	0.04603524785095768	CEBPA, RDH10, FGF8, HOXA5, TBX5, TGFB3, PDGFRA, MGP	402	111	13588	2.4361077495405854	1.0	0.6663238322941121	55.3835243067137
GOTERM_BP_FAT	GO:0030323~respiratory tube development	8	1.2841091492776886	0.049850114105954385	CEBPA, RDH10, FGF8, HOXA5, TBX5, TGFB3, PDGFRA, MGP	402	113	13588	2.392990798221283	1.0	0.6584980867016996	58.342370307920945
GOTERM_BP_FAT	GO:0035108~limb morphogenesis	8	1.2841091492776886	0.0538596329475466	RDH10, FGF8, TBX5, CRABP2, GDF5, GAS1, WNT9A, LRP4	402	115	13588	2.3513735669478693	1.0	0.6758401924591051	61.25246907746228
GOTERM_BP_FAT	GO:0035107~appendage morphogenesis	8	1.2841091492776886	0.0538596329475466	RDH10, FGF8, TBX5, CRABP2, GDF5, GAS1, WNT9A, LRP4	402	115	13588	2.3513735669478693	1.0	0.6758401924591051	61.25246907746228
GOTERM_BP_FAT	GO:0042692~muscle cell differentiation	8	1.2841091492776886	0.05806549248102346	ACADM, DYRK1B, TBX5, SEMA4C, PPP3CA, AGRN, CSRP2, LRP4	402	117	13588	2.3111791470000425	1.0	0.6890090488950429	64.09872530581198
GOTERM_BP_FAT	GO:0060348~bone development	8	1.2841091492776886	0.06024246739960466	BMP1, INSIG1, MGP, GPNMB, AXIN2, CHRD, MMP2, SPP1	402	118	13588	2.2915928830424153	1.0	0.6884067285035715	65.49346934086103
GOTERM_BP_FAT	GO:0006869~lipid transport	8	1.2841091492776886	0.06246897778921497	SLC27A1, ABCA7, APOE, APOL9A, PITPNC1, ABCA1, APOL9B, LBP, PLTP	402	119	13588	2.2723357999916383	1.0	0.6950215845379022	66.86706777617071
GOTERM_BP_FAT	GO:0048736~appendage development	8	1.2841091492776886	0.06246897778921497	RDH10, FGF8, TBX5, CRABP2, GDF5, GAS1, WNT9A, LRP4	402	119	13588	2.2723357999916383	1.0	0.6950215845379022	66.86706777617071
GOTERM_BP_FAT	GO:0060173~limb development	8	1.2841091492776886	0.06246897778921497	RDH10, FGF8, TBX5, CRABP2, GDF5, GAS1, WNT9A, LRP4	402	119	13588	2.2723357999916383	1.0	0.6950215845379022	66.86706777617071
GOTERM_BP_FAT	GO:0042391~regulation of membrane potential	8	1.2841091492776886	0.06246897778921497	TRPM4, SERINC5, SCD2, HEXA, HEXB, PPP3CA, CHRNB1, DMPK	402	119	13588	2.2723357999916383	1.0	0.6950215845379022	66.86706777617071
GOTERM_BP_FAT	GO:0060541~respiratory system development	8	1.2841091492776886	0.07434708494422726	CEBPA, RDH10, FGF8, HOXA5, TBX5, TGFB3, PDGFRA, MGP	402	124	13588	2.180709356443588	1.0	0.7332797941606788	73.36628488132033
GOTERM_BP_FAT	GO:0008544~epidermis development	8	1.2841091492776886	0.07687196892337926	EGFR, ACVR1B, CDKN2A, CST6, PPL, PTGS1, LRP4, KLF4	402	125	13588	2.16326368159204	1.0	0.7362866395125227	74.58338418782024
GOTERM_BP_FAT	GO:0014706~striated muscle tissue development	8	1.2841091492776886	0.08207072187859558	ACADM, MYL6B, TBX5, TGFBR3, PPP3CA, AGRN, SIX4, LRP4	402	127	13588	2.1291965370000394	1.0	0.7425223346334237	76.92639508068406
GOTERM_BP_FAT	GO:0033674~positive regulation of kinase activity	8	1.2841091492776886	0.090239774603001	DGKA, MAP3K5, PLCE1, VAV3, SPHK1, TGFB3, LPAR1, KITL	402	130	13588	2.080061232300038	1.0	0.7575953337505307	80.20150175289555
GOTERM_BP_FAT	GO:0007398~ectoderm development	8	1.2841091492776886	0.09885016873227542	EGFR, ACVR1B, CDKN2A, CST6, PPL, PTGS1, LRP4, KLF4	402	133	13588	2.0331425578872553	1.0	0.7648279536102287	83.17682881753473
GOTERM_BP_FAT	GO:0050873~brown fat cell differentiation	7	1.1235955056179776	1.6983151890697786E-4	CEBPA, SCD1, ALDH6A1, LAMA4, RGS2, SELENBP1, ARL4A	402	29	13588	8.158860868073427	0.27986184664334357	0.1036617283261988	0.29043515952416055
GOTERM_BP_FAT	GO:0006909~phagocytosis	7	1.1235955056179776	0.003043532783707751	ABCA7, LRP1, MYO7A, COLEC12, ABCA1, LBP, MERTK	402	49	13588	4.828713574982232	0.9972388826827613	0.32484162797376237	5.086037157927836
GOTERM_BP_FAT	GO:0030278~regulation of ossification	7	1.1235955056179776	0.004527644628021455	ANK, ENPP1, MNDA, MGP, AXIN2, CHRD, IFI204	402	53	13588	4.464282361776026	0.9998449572858487	0.36977236878335507	7.4768271676829645
GOTERM_BP_FAT	GO:0019221~cytokine-mediated signaling pathway	7	1.1235955056179776	0.005948079887855222	CEBPA, ZCCHC11, IL11RA1, IIGP1, CX3CL1, STAT1, IL6RA	402	56	13588	4.225124378109453	0.9999901886341245	0.3943118075115608	9.711835840935002
GOTERM_BP_FAT	GO:0007050~cell cycle arrest	7	1.1235955056179776	0.006486605971446369	CDKN1A, CDKN2A, TRP53INP1, GAS2, GAS1, SESN1, SESN3	402	57	13588	4.150999389019813	0.9999965579817923	0.3835789947785576	10.545820534565253
GOTERM_BP_FAT	GO:0050678~regulation of epithelial cell proliferation	7	1.1235955056179776	0.010485135809121773	EGFR, AR, CDKN2A, SERPINF1, GRN, TGFBR3, GAS1	402	63	13588	3.7556661138750695	0.9999999985830672	0.4150203342971317	16.51504885797772
GOTERM_BP_FAT	GO:0051259~protein oligomerization	7	1.1235955056179776	0.019360930588762565	STOM, CBR2, C1QTNF1, SRR, TGM2, INSR, SCARA5	402	72	13588	3.2862078496406855	1.0	0.5375696989944967	28.452143385143145
GOTERM_BP_FAT	GO:0042471~ear morphogenesis	7	1.1235955056179776	0.024585071821884647	FGF8, MYO6, MYO7A, INSIG1, C630004H02RIK, GAS1, SIX4	402	76	13588	3.11324954176486	1.0	0.583076402323302	34.70639826627255
GOTERM_BP_FAT	GO:0002526~acute inflammatory response	7	1.1235955056179776	0.03233937783639989	CFP, C1RA, GM5077, NUPR1, C3, C1S, LBP	402	81	13588	2.921073644125054	1.0	0.6126532950595636	43.04780962194859
GOTERM_BP_FAT	GO:0019882~antigen processing and presentation	7	1.1235955056179776	0.04354831603274468	TAP2, H2-GS10, UNC93B1, FCGRT, H2-T23, H2-DMA, TAPBP	402	87	13588	2.7196202893578088	1.0	0.6544277388742825	53.349274284820105
GOTERM_BP_FAT	GO:0002443~leukocyte mediated immunity	7	1.1235955056179776	0.04776321478713238	C1RA, GM5077, CPLX2, C3, IRF7, C1S, H2-DMA	402	89	13588	2.658505226675611	1.0	0.6587178291674927	56.74745742204244
GOTERM_BP_FAT	GO:0045137~development of primary sexual characteristics	7	1.1235955056179776	0.08720684743209048	IMMP2L, AR, RDH10, FGF8, PDGFRA, FOXO3, BCL2L11	402	104	13588	2.2750669728281667	1.0	0.7506273599532465	79.04030734910812
GOTERM_BP_FAT	GO:0001503~ossification	7	1.1235955056179776	0.0935057867875191	BMP1, MGP, GPNMB, AXIN2, CHRD, MMP2, SPP1	402	106	13588	2.232141180888013	1.0	0.7599230383560909	81.3840645722715
GOTERM_BP_FAT	GO:0016064~immunoglobulin mediated immune response	6	0.9630818619582664	0.03798958318032969	C1RA, GM5077, C3, IRF7, C1S, H2-DMA	402	63	13588	3.219142383321488	1.0	0.6363961788424503	48.48223154471085
GOTERM_BP_FAT	GO:0019724~B cell mediated immunity	6	0.9630818619582664	0.042595034189052396	C1RA, GM5077, C3, IRF7, C1S, H2-DMA	402	65	13588	3.1200918484500573	1.0	0.6552991983993199	52.54660711050458
GOTERM_BP_FAT	GO:0042472~inner ear morphogenesis	6	0.9630818619582664	0.047522500047077164	FGF8, MYO6, MYO7A, INSIG1, C630004H02RIK, SIX4	402	67	13588	3.0269547783470707	1.0	0.6610106746794949	56.55983696954425
GOTERM_BP_FAT	GO:0002449~lymphocyte mediated immunity	6	0.9630818619582664	0.07370421656301104	C1RA, GM5077, C3, IRF7, C1S, H2-DMA	402	76	13588	2.6684996072270226	1.0	0.7332310834368001	73.04774444570754
GOTERM_BP_FAT	GO:0035136~forelimb morphogenesis	5	0.8025682182985553	0.0076587049977793874	RDH10, TBX5, CRABP2, GDF5, WNT9A	402	27	13588	6.259443523125116	0.9999996485711906	0.3714969095277999	12.335976005498194
GOTERM_BP_FAT	GO:0050680~negative regulation of epithelial cell proliferation	5	0.8025682182985553	0.0076587049977793874	AR, CDKN2A, SERPINF1, TGFBR3, GAS1	402	27	13588	6.259443523125116	0.9999996485711906	0.3714969095277999	12.335976005498194
GOTERM_BP_FAT	GO:0060021~palate development	5	0.8025682182985553	0.01900645333840266	INSIG1, TGFB3, PDGFRA, TGFBR3, GAS1	402	35	13588	4.828713574982232	0.9999999999999999	0.5382691064776968	28.007954784038912
GOTERM_BP_FAT	GO:0048002~antigen processing and presentation of peptide antigen	5	0.8025682182985553	0.01900645333840266	TAP2, UNC93B1, H2-T23, H2-DMA, TAPBP	402	35	13588	4.828713574982232	0.9999999999999999	0.5382691064776968	28.007954784038912
GOTERM_BP_FAT	GO:0002541~activation of plasma proteins involved in acute inflammatory response	5	0.8025682182985553	0.020898135333607355	CFP, C1RA, GM5077, C3, C1S	402	36	13588	4.694582642343836	1.0	0.5580168114922006	30.34869467771413
GOTERM_BP_FAT	GO:0006956~complement activation	5	0.8025682182985553	0.020898135333607355	CFP, C1RA, GM5077, C3, C1S	402	36	13588	4.694582642343836	1.0	0.5580168114922006	30.34869467771413
GOTERM_BP_FAT	GO:0048638~regulation of developmental growth	5	0.8025682182985553	0.022901334592075093	PLXNA3, AR, TBX5, AGRN, NTN1	402	37	13588	4.567702030388598	1.0	0.5773507368203015	32.74919631102146
GOTERM_BP_FAT	GO:0035272~exocrine system development	5	0.8025682182985553	0.032053845418983706	EGFR, FGF8, TGM2, PLXND1, INSR	402	41	13588	4.122072564009223	1.0	0.6148662077459331	42.75933890291829
GOTERM_BP_FAT	GO:0007160~cell-matrix adhesion	5	0.8025682182985553	0.05946254480955662	ARHGAP6, SNED1, ITGB8, BCL2L11, ITGA2B	402	50	13588	3.3800995024875626	1.0	0.6906462628538161	64.99976062839796
GOTERM_BP_FAT	GO:0010769~regulation of cell morphogenesis involved in differentiation	5	0.8025682182985553	0.05946254480955662	PLXNA3, TGFB3, TGFBR3, SYNGAP1, NTN1	402	50	13588	3.3800995024875626	1.0	0.6906462628538161	64.99976062839796
GOTERM_BP_FAT	GO:0051260~protein homooligomerization	5	0.8025682182985553	0.07067979093346267	STOM, C1QTNF1, SRR, TGM2, SCARA5	402	53	13588	3.188773115554304	1.0	0.7242097360795321	71.50041112509572
GOTERM_BP_FAT	GO:0006959~humoral immune response	5	0.8025682182985553	0.0746431442478013	CFP, C1RA, GM5077, C3, C1S	402	54	13588	3.129721761562558	1.0	0.7285421626646849	73.51178662711195
GOTERM_BP_FAT	GO:0031589~cell-substrate adhesion	5	0.8025682182985553	0.08718763446805833	ARHGAP6, SNED1, ITGB8, BCL2L11, ITGA2B	402	57	13588	2.9649995635855806	1.0	0.753281267081326	79.03275110360124
GOTERM_BP_FAT	GO:0043406~positive regulation of MAP kinase activity	5	0.8025682182985553	0.09608043454244417	MAP3K5, PLCE1, TGFB3, LPAR1, KITL	402	59	13588	2.864491103803019	1.0	0.7645798995446375	82.26907178748206
GOTERM_BP_FAT	GO:0032020~ISG15-protein conjugation	4	0.6420545746388443	9.981997946952236E-5	USP18, ISG15, UBA7, UBE2L6	402	4	13588	33.80099502487562	0.17548640735107957	0.09197269168327293	0.17080219515933637
GOTERM_BP_FAT	GO:0006040~amino sugar metabolic process	4	0.6420545746388443	0.017396952724797164	CSGALNACT1, AMDHD2, GNPDA1, GNPDA2, GM8615	402	19	13588	7.115998952605394	0.9999999999999981	0.5216841351777475	25.95825975889168
GOTERM_BP_FAT	GO:0035115~embryonic forelimb morphogenesis	4	0.6420545746388443	0.025910167779881452	RDH10, TBX5, CRABP2, WNT9A	402	22	13588	6.145635459068295	1.0	0.5707620532635078	36.20886145384752
GOTERM_BP_FAT	GO:0007040~lysosome organization	4	0.6420545746388443	0.025910167779881452	HEXA, MYO7A, HEXB, GAA	402	22	13588	6.145635459068295	1.0	0.5707620532635078	36.20886145384752
GOTERM_BP_FAT	GO:0002478~antigen processing and presentation of exogenous peptide antigen	4	0.6420545746388443	0.02916075844519824	TAP2, UNC93B1, H2-DMA, TAPBP	402	23	13588	5.878433917369673	1.0	0.590919320277942	39.75784578445422
GOTERM_BP_FAT	GO:0045667~regulation of osteoblast differentiation	4	0.6420545746388443	0.04013645946659481	MNDA, AXIN2, CHRD, IFI204	402	26	13588	5.200153080750096	1.0	0.6424069829408948	50.41603957922545
GOTERM_BP_FAT	GO:0007435~salivary gland morphogenesis	4	0.6420545746388443	0.04419617877481291	EGFR, FGF8, TGM2, PLXND1	402	27	13588	5.007554818500092	1.0	0.6554680629746633	53.88746190181794
GOTERM_BP_FAT	GO:0019884~antigen processing and presentation of exogenous antigen	4	0.6420545746388443	0.048451995607825926	TAP2, UNC93B1, H2-DMA, TAPBP	402	28	13588	4.828713574982232	1.0	0.6558566138732663	57.28010791382838
GOTERM_BP_FAT	GO:0006958~complement activation, classical pathway	4	0.6420545746388443	0.057538603230374644	C1RA, GM5077, C3, C1S	402	30	13588	4.506799336650083	1.0	0.6892851144877576	63.75326857067113
GOTERM_BP_FAT	GO:0007431~salivary gland development	4	0.6420545746388443	0.06236195296887617	EGFR, FGF8, TGM2, PLXND1	402	31	13588	4.361418712887176	1.0	0.6978437574556493	66.80223659375548
GOTERM_BP_FAT	GO:0007033~vacuole organization	4	0.6420545746388443	0.07790199638074183	HEXA, MYO7A, HEXB, GAA	402	34	13588	3.9765876499853676	1.0	0.7351494742993951	75.06469710945619
GOTERM_BP_FAT	GO:0002455~humoral immune response mediated by circulating immunoglobulin	4	0.6420545746388443	0.08342345354051776	C1RA, GM5077, C3, C1S	402	35	13588	3.8629708599857855	1.0	0.7456306170743108	77.50182311626156
GOTERM_BP_FAT	GO:0042552~myelination	4	0.6420545746388443	0.0949493003319157	SERINC5, SCD2, HEXA, HEXB	402	37	13588	3.654161624310878	1.0	0.7628677961162377	81.88525107437293
GOTERM_BP_FAT	GO:0001573~ganglioside metabolic process	3	0.4815409309791332	0.027262383273693493	ITGB8, HEXA, HEXB	402	9	13588	11.266998341625207	1.0	0.5835126774871572	37.708473322005574
GOTERM_BP_FAT	GO:0006041~glucosamine metabolic process	3	0.4815409309791332	0.04006555466866071	AMDHD2, GNPDA1, GNPDA2, GM8615	402	11	13588	9.218453188602442	1.0	0.6465495825924222	50.35327834688583
GOTERM_BP_FAT	GO:0048070~regulation of pigmentation during development	3	0.4815409309791332	0.04006555466866071	ADAMTS9, KITL, BCL2L11	402	11	13588	9.218453188602442	1.0	0.6465495825924222	50.35327834688583
GOTERM_BP_FAT	GO:0006044~N-acetylglucosamine metabolic process	3	0.4815409309791332	0.04006555466866071	AMDHD2, GNPDA1, GNPDA2, GM8615	402	11	13588	9.218453188602442	1.0	0.6465495825924222	50.35327834688583
GOTERM_BP_FAT	GO:0048645~organ formation	3	0.4815409309791332	0.047158365054859264	AR, RDH10, HOXA3	402	12	13588	8.450248756218906	1.0	0.6623597472218921	56.27456196441114
GOTERM_BP_FAT	GO:0043113~receptor clustering	3	0.4815409309791332	0.054668567211788796	AGRN, SYNGAP1, LRP4	402	13	13588	7.800229621125143	1.0	0.6776143863699543	61.815893991662854
GOTERM_BP_FAT	GO:0009886~post-embryonic morphogenesis	3	0.4815409309791332	0.06256548254192017	MYO7A, GDF5, BCL2L11	402	14	13588	7.243070362473348	1.0	0.692164125392484	66.9254241092008
GOTERM_BP_FAT	GO:0048569~post-embryonic organ development	3	0.4815409309791332	0.06256548254192017	MYO7A, BCL2L11, KLF4	402	14	13588	7.243070362473348	1.0	0.692164125392484	66.9254241092008
GOTERM_BP_FAT	GO:0007172~signal complex assembly	3	0.4815409309791332	0.07081987177382307	AGRN, SYNGAP1, LRP4	402	15	13588	6.760199004975124	1.0	0.7217221306329317	71.57388783360103
GOTERM_BP_FAT	GO:0060571~morphogenesis of an epithelial fold	3	0.4815409309791332	0.07940387707898422	EGFR, AR, RDH10	402	16	13588	6.337686567164178	1.0	0.7333159067783308	75.7511406302421
GOTERM_BP_FAT	GO:0050771~negative regulation of axonogenesis	3	0.4815409309791332	0.07940387707898422	PLXNA3, SYNGAP1, NTN1	402	16	13588	6.337686567164178	1.0	0.7333159067783308	75.7511406302421
GOTERM_BP_FAT	GO:0032330~regulation of chondrocyte differentiation	3	0.4815409309791332	0.07940387707898422	MAF, GDF5, WNT9A	402	16	13588	6.337686567164178	1.0	0.7333159067783308	75.7511406302421
GOTERM_BP_FAT	GO:0060425~lung morphogenesis	3	0.4815409309791332	0.088290966330834	RDH10, FGF8, HOXA5	402	17	13588	5.964881474978051	1.0	0.7523908030648241	79.46254916787092
GOTERM_BP_FAT	GO:0060445~branching involved in salivary gland morphogenesis	3	0.4815409309791332	0.09745587944542144	FGF8, TGM2, PLXND1	402	18	13588	5.633499170812604	1.0	0.7621870569339665	82.72547697062042
GOTERM_BP_FAT	GO:0048525~negative regulation of viral reproduction	2	0.32102728731942215	0.05815385617948863	OAS1B, OAS1A	402	2	13588	33.80099502487562	1.0	0.6859254804915872	64.15635682322385
GOTERM_BP_FAT	GO:0033700~phospholipid efflux	2	0.32102728731942215	0.05815385617948863	ABCA7, ABCA1	402	2	13588	33.80099502487562	1.0	0.6859254804915872	64.15635682322385
GOTERM_BP_FAT	GO:0006689~ganglioside catabolic process	2	0.32102728731942215	0.08595308359358907	HEXA, HEXB	402	3	13588	22.533996683250415	1.0	0.7536519725521313	78.54180202222037

## Sheet: CC-FAT-Up-in dense
Category	Term	Count	%	PValue	Genes	List Total	Pop Hits	Pop Total	Fold Enrichment	Bonferroni	Benjamini	FDR
GOTERM_CC_FAT	GO:0005886~plasma membrane	106	17.014446227929376	0.008304622404520252	TGFB3, LPAR1, MMP2, TAPBP, GNG8, AGTR2, APOE, ROBO1, WNK4, ADAM8, CDH26, INSR, EGFR, 4931408A02RIK, F11R, MYO6, BST2, H2-GS10, MRGPRF, RND2, PLCE1, TNS1, PDGFRA, CAR9, VAMP1, ITGA2B, SEPT9, CGNL1, ABCA7, ENPP1, ENPP2, BBS9, MME, FCGRT, ABCA1, CX3CL1, ABCA3, ALCAM, EPHB6, ITGB8, TTYH2, PPL, MSLN, PLXND1, CDC42EP5, BLNK, VAV3, KCTD1, GAS1, KITL, PCDH19, CAMK2N1, GPR153, P2RX5, EPS8, RGS3, ITGA7, TG…	367	2906	12504	1.2427768536767863	0.9094377476101274	0.23421783728148893	10.48323821914996
GOTERM_CC_FAT	GO:0005576~extracellular region	86	13.804173354735152	1.7136650608708953E-7	FGF8, GLB1L, A430110N23RIK, FAM20A, GDF6, LTBP4, GDF5, TGFB3, HP, MMP28, MMP2, CXCL10, CFP, ST3GAL1, OGN, OLFML3, APOD, ISG15, APOE, SERAC1, TGFBI, ANGPT1, SEMA3B, SEPP1, LBP, PI16, PRSS35, MATN2, AMY1, OLFML2B, CAR11, MGP, ADAMTS9, PDDC1, SERPINF1, GRN, PLA2G7, MFAP2, VCAN, WNT9A, PGCP, ADAMTS4, WNT5B, ADAMTSL2, ENPP1, C3, ENPP2, COL3A1, IL33, CX3CL1, CCL5, ISLR, ANGPTL7, EPHB6, C1QTNF5, LGALS3B…	367	1680	12504	1.744102763721292	4.935234011771428E-5	1.6451050674826107E-5	2.2757123337990848E-4
GOTERM_CC_FAT	GO:0044421~extracellular region part	56	8.98876404494382	6.570133047304611E-10	LTBP4, GDF6, GDF5, TGFB3, MMP28, MMP2, CXCL10, OGN, APOE, SERAC1, TGFBI, LBP, SEPP1, MATN2, AMY1, OLFML2B, MGP, ADAMTS9, SERPINF1, GRN, PLA2G7, VCAN, MFAP2, WNT9A, ADAMTS4, WNT5B, ADAMTSL2, ENPP1, C3, COL3A1, CX3CL1, IL33, CCL5, LGALS3BP, C1QTNF1, COL6A3, TGM2, COL6A2, COL6A1, ADAMTS10, AGRN, FLT3L, SPP1, COL18A1, PLAT, HAPLN4, BMP1, IL1RN, NTN1, KITL, SOD3, LAMA4, ARSA, FBLN7, TGFBR3, CHRD	367	774	12504	2.4650740341761193	1.892198219222152E-7	1.892198219222152E-7	8.725012490273798E-7
GOTERM_CC_FAT	GO:0005615~extracellular space	32	5.136436597110754	9.9735212143223E-5	ENPP1, C3, GDF6, GDF5, TGFB3, CX3CL1, IL33, CCL5, MMP2, CXCL10, APOE, C1QTNF1, COL6A3, TGFBI, SEPP1, FLT3L, LBP, AGRN, SPP1, PLAT, AMY1, BMP1, IL1RN, MGP, KITL, SOD3, ADAMTS9, SERPINF1, GRN, ARSA, PLA2G7, CHRD	367	511	12504	2.1335949705924695	0.028316527932244262	0.005728563560947197	0.13236539667061953
GOTERM_CC_FAT	GO:0031012~extracellular matrix	30	4.815409309791333	3.036182842873014E-8	WNT5B, ADAMTSL2, LTBP4, COL3A1, TGFB3, MMP28, MMP2, OGN, LGALS3BP, SERAC1, COL6A3, TGFBI, COL6A2, TGM2, COL6A1, ADAMTS10, AGRN, COL18A1, MATN2, HAPLN4, OLFML2B, NTN1, ADAMTS9, LAMA4, FBLN7, TGFBR3, MFAP2, VCAN, WNT9A, ADAMTS4	367	309	12504	3.3078489987037383	8.744168477070602E-6	4.372093796112253E-6	4.0319925243004207E-5
GOTERM_CC_FAT	GO:0005578~proteinaceous extracellular matrix	26	4.173354735152488	2.120844849562614E-6	WNT5B, ADAMTSL2, LTBP4, COL3A1, MMP28, MMP2, OGN, LGALS3BP, TGFBI, COL6A2, TGM2, COL6A1, ADAMTS10, AGRN, COL18A1, MATN2, HAPLN4, NTN1, ADAMTS9, LAMA4, FBLN7, TGFBR3, MFAP2, VCAN, WNT9A, ADAMTS4	367	297	12504	2.9826328681914513	6.106174616042903E-4	1.526893328900325E-4	0.0028164050968504384
GOTERM_CC_FAT	GO:0019898~extrinsic to membrane	23	3.6918138041733553	0.021154556748940984	ADSSL1, MYO6, APC2, BAIAP2, PTGS1, CYP2J6, SELENBP1, GAS2, MYLIP, APPL2, SPRY4, BCL2L11, GNG8, APOE, PPL, ARSA, COL6A2, GFRA1, IIGP1, RAPGEF3, ARAP1, DCXR, CDC42EP5	367	472	12504	1.6602318385443124	0.9978832598554137	0.4286807362495132	24.71901052954264
GOTERM_CC_FAT	GO:0009986~cell surface	17	2.7287319422150884	0.017744793960998817	LY6C1, ENPP1, MRC2, CX3CL1, LY6C2, IL6RA, ALCAM, LY6A, CDH13, LRP1, APOE, CLEC2D, ARSA, TGFBR3, FLT3L, AGRN, SCARA5, ITGA2B	367	305	12504	1.8990306874525393	0.9942375162301026	0.40288088848612735	21.16107403449281
GOTERM_CC_FAT	GO:0005764~lysosome	14	2.247191011235955	0.0022304988294574854	MYO7A, HEXA, HEXB, USE1, MARCH9, IL4I1, DNASE2A, NAGA, ARSA, GAA, H2-DMA, CTNS, CTSH, CTSF	367	178	12504	2.6797293573768486	0.47434025489790665	0.10163921350141525	2.9218328749464173
GOTERM_CC_FAT	GO:0000323~lytic vacuole	14	2.247191011235955	0.002343245524254682	MYO7A, HEXA, HEXB, USE1, MARCH9, IL4I1, DNASE2A, NAGA, ARSA, GAA, H2-DMA, CTNS, CTSH, CTSF	367	179	12504	2.6647588023077042	0.49117270545940905	0.09200912156636376	3.067407523383192
GOTERM_CC_FAT	GO:0005773~vacuole	14	2.247191011235955	0.007074737952329487	MYO7A, HEXA, HEXB, USE1, MARCH9, IL4I1, DNASE2A, NAGA, ARSA, GAA, H2-DMA, CTNS, CTSH, CTSF	367	204	12504	2.338195223593525	0.8705895550343092	0.2255450386472787	8.997671803819152
GOTERM_CC_FAT	GO:0044441~cilium part	5	0.8025682182985553	0.031215460612684313	BBS2, BBS9, DYNC2LI1, MFAP2, RSPH9	367	41	12504	4.154981059347378	0.9998919975960237	0.5328538378990222	34.3703908824484
GOTERM_CC_FAT	GO:0019897~extrinsic to plasma membrane	5	0.8025682182985553	0.07686257410215161	GNG8, APC2, APOE, PPL, ARSA	367	55	12504	3.0973495169680456	0.9999999999007544	0.8070346305687353	65.42646211029114
GOTERM_CC_FAT	GO:0031232~extrinsic to external side of plasma membrane	2	0.32102728731942215	0.05768676937976541	APOE, ARSA	367	2	12504	34.0708446866485	0.9999999629964659	0.7318817350196991	54.57255340706393

## Sheet: BP-FAT-Down in dense
Category	Term	Count	%	PValue	Genes	List Total	Pop Hits	Pop Total	Fold Enrichment	Bonferroni	Benjamini	FDR
GOTERM_BP_FAT	GO:0007049~cell cycle	139	21.92429022082019	1.2662266065226017E-77	KIFC1, PRC1, DBF4, KNTC1, PKMYT1, AURKA, AURKB, CDCA8, OIP5, B230120H23RIK, INCENP, CDCA2, PMS2, CCNA2, CDCA5, CDCA3, RAN, LIG1, RBL1, SGOL1, 4632434I11RIK, SKP2, ESPL1, TOPBP1, TACC3, 6720463M24RIK, NCAPD3, GM9430, ESCO2, WEE1, NCAPD2, UHRF1, MAD2L1, TIMELESS, SPAG5, NUP43, DSCC1, CCDC99, NEK2, MRE11A, TIPIN, CHEK1, ANLN, RCC1, SPC24, SPC25, NCAPG2, SAC3D1, MNS1, FBXO5, SKA1, HELLS, TFDP1, ERCC6…	464	611	13588	6.6621000056436595	2.3171946899363613E-74	2.3171946899363613E-74	2.154464914386666E-74
GOTERM_BP_FAT	GO:0022402~cell cycle process	105	16.561514195583594	9.059496924434499E-65	KIFC1, DBF4, KNTC1, AURKB, CDCA8, OIP5, INCENP, CDCA2, PMS2, CDCA5, CCNA2, CDCA3, RAN, SGOL1, SKP2, 4632434I11RIK, TOPBP1, ESPL1, TACC3, GM9430, NCAPD3, WEE1, 6720463M24RIK, NCAPD2, MAD2L1, TIMELESS, SPAG5, NUP43, CCDC99, NEK2, MRE11A, TIPIN, CHEK1, ANLN, RCC1, SPC24, SPC25, NCAPG2, SAC3D1, FBXO5, MNS1, SKA1, HELLS, ERCC6L, TFDP1, MKI67, NUF2, BRCA2, NDC80, CDC20, BRCA1, PLK1, GM15452, FAM83D, CG…	464	393	13588	7.824098446959726	1.6578879371715132E-61	5.5262931239050445E-62	1.5414593379372053E-61
GOTERM_BP_FAT	GO:0022403~cell cycle phase	99	15.615141955835963	2.0331082339212704E-66	KIFC1, DBF4, KNTC1, AURKB, CDCA8, OIP5, INCENP, CDCA2, PMS2, CDCA5, CCNA2, CDCA3, RAN, SGOL1, SKP2, TOPBP1, ESPL1, TACC3, GM9430, NCAPD3, WEE1, 6720463M24RIK, NCAPD2, MAD2L1, TIMELESS, SPAG5, NUP43, CCDC99, NEK2, MRE11A, TIPIN, CHEK1, ANLN, RCC1, SPC24, SPC25, SAC3D1, NCAPG2, FBXO5, MNS1, SKA1, HELLS, ERCC6L, TFDP1, MKI67, NUF2, BRCA2, NDC80, CDC20, PLK1, GM15452, FAM83D, PSMC3IP, MTBP, TUBB5, GM…	464	328	13588	8.838914003364172	3.720588068075925E-63	1.8602940340379625E-63	3.4593020985109345E-63
GOTERM_BP_FAT	GO:0000279~M phase	92	14.511041009463725	1.0221434238043724E-64	KIFC1, GM15452, KNTC1, AURKB, FAM83D, CDCA8, OIP5, INCENP, PSMC3IP, TUBB5, CDCA2, PMS2, GM5593, RANBP1, CCNA2, CDCA5, FANCA, CDCA3, CDC6, CDK1, KIF11, RAN, SGOL1, CCNF, TPX2, NUSAP1, ESPL1, TOPBP1, TACC3, UBE2C, GM9430, CDK2, NCAPD3, WEE1, 6720463M24RIK, RAD51, NCAPD2, MAD2L1, TIMELESS, EREG, SPAG5, NSL1, BUB1B, NUP43, HAUS4, HAUS3, CCDC99, HAUS5, NEK2, MRE11A, TIPIN, ANLN, CEP55, RCC1, C79407, R…	464	283	13588	9.5200438649933	1.8705224655620016E-61	4.676306163905004E-62	1.739161168082968E-61
GOTERM_BP_FAT	GO:0006259~DNA metabolic process	88	13.880126182965299	2.3729796481680623E-44	CLSPN, KIF22, XRCC2, PDGFB, GM13237, DBF4, MCM10, CDT1, PRIM1, CCNE2, CCNE1, MCM8, CDC45, MCM7, CTGF, FANCI, PRIM2, PSMC3IP, PMS2, MYC, FANCA, TOP2A, FANCB, CDC6, GM6091, DTL, GEN1, USP1, NEIL3, LIG1, POLE, TOPBP1, MCM2, MCM3, MCM4, ESCO2, GM9430, GM5648, MCM5, RAD51, MCM6, RFC5, EYA4, UHRF1, RFC3, DCLRE1B, RFC4, RRM2, RRM1, RAD18, DSCC1, BLM, LIN9, UNG, MRE11A, POLA1, TIPIN, CHEK1, POLA2, TK1, R…	464	421	13588	6.121222049307887	4.342552756147554E-41	4.342552756147554E-42	4.0375880337659365E-41
GOTERM_BP_FAT	GO:0051301~cell division	82	12.933753943217665	3.164565938630616E-53	KIFC1, PRC1, GM15452, KNTC1, AURKB, FAM83D, CCNE2, CCNE1, CDC45, CDCA8, CDCA7, OIP5, INCENP, CDCA2, GM5593, TOP2A, CDCA5, CCNA2, CDCA3, CDC7, CDC6, CDK1, KIF11, RAN, LIG1, SGOL1, CCNF, NUSAP1, UBE2C, GM9430, CDK2, WEE1, MCM5, 6720463M24RIK, NCAPD3, NCAPD2, MAD2L1, TIMELESS, SPAG5, NSL1, BUB1B, NUP43, HAUS4, HAUS3, CKS1B, CCDC99, HAUS5, NEK2, TIPIN, ANLN, CEP55, RCC1, C79407, SPC24, SPC25, NCAPH, …	464	281	13588	8.54564977297828	5.791155667694027E-50	8.273079525277182E-51	5.384459818583879E-50
GOTERM_BP_FAT	GO:0000278~mitotic cell cycle	81	12.77602523659306	1.8221742132123163E-57	KIFC1, DBF4, KNTC1, AURKA, AURKB, FAM83D, CDCA8, OIP5, INCENP, MTBP, CDCA2, GM5593, CDCA5, CCNA2, CDCA3, CDC6, CDK1, KIF11, RAN, SGOL1, CCNF, SKP2, NUSAP1, UBE2C, GM9430, WEE1, 6720463M24RIK, NCAPD3, CDK2, RBBP8, NCAPD2, MAD2L1, TIMELESS, SPAG5, NSL1, BUB1B, NUP43, HAUS4, HAUS3, CCDC99, HAUS5, NEK2, TIPIN, POLA1, CHEK1, ANLN, CEP55, RCC1, C79407, SPC24, SPC25, NCAPH, NCAPG2, SAC3D1, F630043A04RIK…	464	244	13588	9.721488128886378	3.334578810178539E-54	6.669157620357078E-55	3.1004011367660273E-54
GOTERM_BP_FAT	GO:0000087~M phase of mitotic cell cycle	72	11.35646687697161	8.969601727189537E-55	KIFC1, KNTC1, AURKB, FAM83D, CDCA8, OIP5, INCENP, CDCA2, GM5593, CDCA5, CCNA2, CDCA3, CDC6, CDK1, KIF11, RAN, SGOL1, CCNF, NUSAP1, UBE2C, GM9430, WEE1, 6720463M24RIK, NCAPD3, CDK2, NCAPD2, MAD2L1, TIMELESS, SPAG5, NSL1, BUB1B, NUP43, HAUS4, HAUS3, CCDC99, HAUS5, NEK2, TIPIN, ANLN, CEP55, RCC1, C79407, SPC24, SPC25, NCAPH, NCAPG2, SAC3D1, F630043A04RIK, BUB1, FBXO5, SKA1, ZWILCH, HELLS, ERCC6L, FA…	464	194	13588	10.8684678279417	1.6414371160756854E-51	2.735728526792809E-52	1.526163809677218E-51
GOTERM_BP_FAT	GO:0000280~nuclear division	70	11.041009463722396	5.993174841511758E-53	KIFC1, KNTC1, AURKB, FAM83D, CDCA8, OIP5, INCENP, CDCA2, GM5593, CDCA5, CCNA2, CDCA3, CDC6, CDK1, KIF11, RAN, SGOL1, CCNF, NUSAP1, UBE2C, GM9430, WEE1, 6720463M24RIK, NCAPD3, CDK2, NCAPD2, MAD2L1, TIMELESS, SPAG5, NSL1, BUB1B, NUP43, HAUS4, HAUS3, CCDC99, HAUS5, NEK2, TIPIN, ANLN, CEP55, RCC1, C79407, SPC24, SPC25, NCAPH, NCAPG2, SAC3D1, F630043A04RIK, BUB1, FBXO5, SKA1, ZWILCH, HELLS, ERCC6L, FA…	464	190	13588	10.789019963702358	1.0967509959966517E-49	1.3709387449958146E-50	1.019729395616003E-49
GOTERM_BP_FAT	GO:0007067~mitosis	70	11.041009463722396	5.993174841511758E-53	KIFC1, KNTC1, AURKB, FAM83D, CDCA8, OIP5, INCENP, CDCA2, GM5593, CDCA5, CCNA2, CDCA3, CDC6, CDK1, KIF11, RAN, SGOL1, CCNF, NUSAP1, UBE2C, GM9430, WEE1, 6720463M24RIK, NCAPD3, CDK2, NCAPD2, MAD2L1, TIMELESS, SPAG5, NSL1, BUB1B, NUP43, HAUS4, HAUS3, CCDC99, HAUS5, NEK2, TIPIN, ANLN, CEP55, RCC1, C79407, SPC24, SPC25, NCAPH, NCAPG2, SAC3D1, F630043A04RIK, BUB1, FBXO5, SKA1, ZWILCH, HELLS, ERCC6L, FA…	464	190	13588	10.789019963702358	1.0967509959966517E-49	1.3709387449958146E-50	1.019729395616003E-49
GOTERM_BP_FAT	GO:0048285~organelle fission	70	11.041009463722396	1.0552731684509903E-51	KIFC1, KNTC1, AURKB, FAM83D, CDCA8, OIP5, INCENP, CDCA2, GM5593, CDCA5, CCNA2, CDCA3, CDC6, CDK1, KIF11, RAN, SGOL1, CCNF, NUSAP1, UBE2C, GM9430, WEE1, 6720463M24RIK, NCAPD3, CDK2, NCAPD2, MAD2L1, TIMELESS, SPAG5, NSL1, BUB1B, NUP43, HAUS4, HAUS3, CCDC99, HAUS5, NEK2, TIPIN, ANLN, CEP55, RCC1, C79407, SPC24, SPC25, NCAPH, NCAPG2, SAC3D1, F630043A04RIK, BUB1, FBXO5, SKA1, ZWILCH, HELLS, ERCC6L, FA…	464	197	13588	10.405653772098722	1.9311498982653124E-48	2.1457221091836806E-49	1.7955309143006282E-48
GOTERM_BP_FAT	GO:0033554~cellular response to stress	53	8.3596214511041	6.224128141291918E-17	CLSPN, KIF22, XRCC2, GM13237, FANCI, AEN, PMS2, FANCA, FANCB, CDK1, SGK1, DTL, GEN1, LIG1, NEIL3, USP1, POLE, TOPBP1, ESCO2, GM5648, RAD51, EYA4, UHRF1, DCLRE1B, TIMELESS, RAD18, TXNRD1, BLM, MRE11A, UNG, POLA1, TIPIN, CHEK1, RPA1, CHD1L, FEN1, TRIP13, EXO1, RAD51AP1, EME1, BRCA2, BRIP1, ATAD5, RAD54L, BRCA1, DNA2, TDP1, EEF1E1, POLD1, PCNA, RAD54B, CHAF1A, CHAF1B, BARD1	464	404	13588	3.8417762034824174	2.0317081350640365E-13	1.354472090042691E-14	1.887379141862766E-13
GOTERM_BP_FAT	GO:0006974~response to DNA damage stimulus	52	8.201892744479496	7.31272726638173E-23	CLSPN, KIF22, XRCC2, GM13237, FANCI, AEN, PMS2, FANCA, FANCB, CDK1, SGK1, DTL, GEN1, LIG1, NEIL3, USP1, POLE, TOPBP1, ESCO2, GM5648, RAD51, EYA4, UHRF1, DCLRE1B, TIMELESS, RAD18, BLM, MRE11A, UNG, POLA1, TIPIN, CHEK1, RPA1, CHD1L, FEN1, TRIP13, EXO1, RAD51AP1, EME1, BRCA2, BRIP1, ATAD5, RAD54L, BRCA1, DNA2, TDP1, EEF1E1, POLD1, PCNA, RAD54B, CHAF1A, CHAF1B, BARD1	464	287	13588	5.305899315150787	1.3382290897478566E-19	1.1151909081232138E-20	1.2442491922646967E-19
GOTERM_BP_FAT	GO:0006260~DNA replication	51	8.04416403785489	5.523198563445292E-36	PDGFB, DBF4, MCM10, CDT1, CCNE2, PRIM1, CCNE1, CDC45, MCM8, MCM7, CTGF, PRIM2, CDC6, GM6091, DTL, LIG1, POLE, MCM2, MCM3, MCM4, MCM5, GM9430, MCM6, RAD51, RFC5, RFC3, RFC4, RRM2, RRM1, DSCC1, BLM, LIN9, TIPIN, POLA1, POLA2, TK1, RPA1, RPA2, POLE2, FEN1, GINS1, GINS2, GINS3, BRCA2, BRCA1, POLD3, DNA2, POLD1, POLD2, PCNA, CHTF18, CHAF1A, CHAF1B	464	152	13588	9.825714609800363	1.0107453371104885E-32	9.188593973731714E-34	9.39763661483393E-33
GOTERM_BP_FAT	GO:0006281~DNA repair	45	7.097791798107256	8.411749516096317E-22	KIF22, CLSPN, XRCC2, BLM, MRE11A, GM13237, UNG, POLA1, CHEK1, RPA1, CHD1L, FANCI, PMS2, FANCA, FANCB, FEN1, TRIP13, EXO1, RAD51AP1, GEN1, LIG1, NEIL3, USP1, EME1, POLE, BRIP1, BRCA2, TOPBP1, RAD54L, ESCO2, BRCA1, GM5648, RAD51, EYA4, DNA2, UHRF1, DCLRE1B, TDP1, POLD1, EEF1E1, PCNA, RAD18, RAD54B, CHAF1A, CHAF1B, BARD1	464	222	13588	5.936043802423113	1.539350161445626E-18	1.0995358296040186E-19	1.4312461219566898E-18
GOTERM_BP_FAT	GO:0006796~phosphate metabolic process	39	6.151419558359621	0.06405892617170153	NEK2, PASK, PKMYT1, TTK, AURKA, CHEK1, CAD, AURKB, IGSF10, CCNE1, VRK1, VRK2, DUSP14, PAK3, B230120H23RIK, BUB1, GM5593, STK39, MASTL, CDC7, CDK1, SGK1, PBK, GSG2, EPHA2, CDC25A, CDK2, WEE1, PPA1, CCNB1, PLK4, PLK2, NME1, RPS6KA2, PLK1, GADD45G, BUB1B, CIT, DUSP8, MELK	464	866	13588	1.3188161981364976	1.0	0.581714176085346	67.58113504054634
GOTERM_BP_FAT	GO:0006793~phosphorus metabolic process	39	6.151419558359621	0.06405892617170153	NEK2, PASK, PKMYT1, TTK, AURKA, CHEK1, CAD, AURKB, IGSF10, CCNE1, VRK1, VRK2, DUSP14, PAK3, B230120H23RIK, BUB1, GM5593, STK39, MASTL, CDC7, CDK1, SGK1, PBK, GSG2, EPHA2, CDC25A, CDK2, WEE1, PPA1, CCNB1, PLK4, PLK2, NME1, RPS6KA2, PLK1, GADD45G, BUB1B, CIT, DUSP8, MELK	464	866	13588	1.3188161981364976	1.0	0.581714176085346	67.58113504054634
GOTERM_BP_FAT	GO:0016310~phosphorylation	35	5.520504731861198	0.03263102484266289	NEK2, PASK, PKMYT1, TTK, AURKA, CHEK1, CAD, AURKB, IGSF10, CCNE1, VRK1, VRK2, PAK3, B230120H23RIK, BUB1, GM5593, STK39, MASTL, CDC7, CDK1, SGK1, PBK, GSG2, EPHA2, CDK2, WEE1, CCNB1, PLK4, PLK2, PLK1, NME1, RPS6KA2, GADD45G, BUB1B, CIT, MELK	464	718	13588	1.4275165690135434	1.0	0.4184512832864804	43.133990720723624
GOTERM_BP_FAT	GO:0051276~chromosome organization	34	5.3627760252365935	3.133270221226526E-6	CCDC99, BLM, NEK2, EZH2, HAT1, RPA1, NCAPH, CHD1L, NCAPG2, ASF1B, CDCA5, TOP2A, HELLS, SETDB2, RBL1, KIF18A, SUV39H1, NUSAP1, BRCA2, WHSC1, MCM2, SMC2, RAD54L, NCAPD3, GSG2, SMC4, CENPH, NCAPD2, EYA4, BAZ1A, MAD2L1, DNMT1, SETD8, CIT	464	404	13588	2.4645356777057015	0.005717486094990676	1.7373925370456345E-4	0.005331076886461172
GOTERM_BP_FAT	GO:0006468~protein amino acid phosphorylation	34	5.3627760252365935	0.01161098343786855	NEK2, PASK, PKMYT1, TTK, AURKA, CHEK1, CAD, AURKB, IGSF10, CCNE1, VRK1, VRK2, PAK3, B230120H23RIK, BUB1, GM5593, STK39, MASTL, CDC7, CDK1, SGK1, PBK, GSG2, CDK2, WEE1, EPHA2, CCNB1, PLK4, PLK2, PLK1, RPS6KA2, GADD45G, BUB1B, CIT, MELK	464	640	13588	1.555738146551724	0.9999999994775117	0.21562526400156634	18.02164724337064
GOTERM_BP_FAT	GO:0007017~microtubule-based process	33	5.205047318611988	1.0383484980459765E-12	HAUS4, KIF23, KIF22, KIFC1, HAUS3, CCDC99, HAUS5, KIF2C, SPC25, SAC3D1, KIF4, TUBB5, TUBB6, FBXO5, RANBP1, TUBA1B, KIF11, GM5620, KIF5C, KIF15, NUF2, TPX2, KIF18A, NUSAP1, KIF18B, BIRC5, NDC80, CENPE, ESPL1, TACC3, CENPJ, GM14150, BRCA1, GM3226, KIF20B, KIF20A	464	211	13588	4.580037587841151	1.9002566187253933E-9	1.0556977514397659E-10	1.7668089213884741E-9
GOTERM_BP_FAT	GO:0007010~cytoskeleton organization	32	5.047318611987381	2.475890171749451E-7	HAUS4, HAUS3, CCDC99, HAUS5, PDGFB, FHDC1, SPC25, SORBS1, SAC3D1, B230120H23RIK, TUBB5, FBXO5, RANBP1, CNN1, TUBA1B, KIF11, GM5620, NUF2, TPX2, KIF18A, NUSAP1, BIRC5, NDC80, CENPE, ESPL1, RACGAP1, TACC3, GM14150, SIRPA, CENPJ, BRCA1, GM3226, TAGLN, LIMCH1, DIAP3	464	326	13588	2.874550454833933	4.5298532867588115E-4	1.6780894663059875E-5	4.2126803402320334E-4
GOTERM_BP_FAT	GO:0051726~regulation of cell cycle	29	4.574132492113565	9.475758038942923E-10	CLSPN, DBF4, TIPIN, CHEK1, CITED2, CDT1, CCNE2, CCNE1, B230120H23RIK, MTBP, FBXO5, RANBP1, ZWILCH, MYC, RECQL4, CDK1, GMNN, SKP2, DBC1, BRCA2, CENPF, NUSAP1, BIRC5, CENPE, TACC3, PLK4, MAD2L1, EREG, GADD45G	464	214	13588	3.968457943925234	1.7340622032735453E-6	8.257445882620118E-8	1.6122854940014975E-6
GOTERM_BP_FAT	GO:0042127~regulation of cell proliferation	29	4.574132492113565	0.017286785798014476	FGF7, BLM, PDGFB, FOXM1, CSF1, E2F7, TIPIN, PAWR, RPA1, MINA, PRL2C3, MSX2, BDNF, CDCA7, SERPINE1, MTBP, MYC, FANCA, GNL3, PRL2C2, KLF5, RECQL4, ODC1, GM9115, EFNB1, GM7278, CENPF, HES1, EREG, EEF1E1, DNMT1	464	538	13588	1.578531598513011	0.9999999999999861	0.2828074050488929	25.673598358199644
GOTERM_BP_FAT	GO:0010605~negative regulation of macromolecule metabolic process	28	4.416403785488959	0.014398247477348358	CLSPN, BLM, TIPIN, ERI1, HAT1, CDT1, CITED2, AHRR, FBXO5, MYC, HELLS, HNRNPAB, GMNN, RBL1, SKP2, SUV39H1, BRCA2, CENPF, MXD3, HES1, DLX2, PA2G4, EREG, TIMELESS, ID2, RAD18, DNMT1, MYBBP1A	464	506	13588	1.6204852119394848	0.9999999999970236	0.24827130953854748	21.867550550839752
GOTERM_BP_FAT	GO:0007059~chromosome segregation	27	4.2586750788643535	6.037368773745486E-22	CCDC99, NEK2, SPC25, EBNA1BP2, INCENP, F630043A04RIK, SKA1, CDCA5, TOP2A, FAM33A, CENPO, SGOL1, NUF2, KIF18A, CENPF, NUSAP1, ESPL1, BIRC5, NDC80, CENPE, NCAPD3, SMC4, CENPH, MAD2L1, NSL1, CIT, NUP43	464	64	13588	12.354391163793101	1.104838485595424E-18	8.498757581503261E-20	1.0272489245799247E-18
GOTERM_BP_FAT	GO:0044271~nitrogen compound biosynthetic process	25	3.943217665615142	1.0867218358324922E-4	BCAT1, ATP1B1, SRM, CTPS, ASNS, CAD, PSPH, PPAT, MTHFD1L, MTHFD1, TYMS, SLC1A3, ATIC, CPOX, DDAH1, DCTD, ODC1, GM9115, GM7278, GM7901, UMPS, DHFR, NME1, RRM2, RRM1, PHGDH, PSAT1, PRPS1	464	302	13588	2.424212148892441	0.1803524945635736	0.004409823660023404	0.18474322029984336
GOTERM_BP_FAT	GO:0045934~negative regulation of nucleobase, nucleoside, nucleotide and nucleic acid metabolic process	25	3.943217665615142	0.004859724373116233	CLSPN, BLM, TIPIN, HAT1, CDT1, CITED2, AHRR, MYC, HELLS, HNRNPAB, GMNN, RBL1, SUV39H1, BRCA2, CENPF, MXD3, HES1, DLX2, PA2G4, TIMELESS, ID2, EREG, RAD18, DNMT1, MYBBP1A	464	397	13588	1.844111004950925	0.9998656383284444	0.11349865821897698	7.95467141271029
GOTERM_BP_FAT	GO:0051172~negative regulation of nitrogen compound metabolic process	25	3.943217665615142	0.005446048249352491	CLSPN, BLM, TIPIN, HAT1, CDT1, CITED2, AHRR, MYC, HELLS, HNRNPAB, GMNN, RBL1, SUV39H1, BRCA2, CENPF, MXD3, HES1, DLX2, PA2G4, TIMELESS, ID2, EREG, RAD18, DNMT1, MYBBP1A	464	401	13588	1.8257158827070255	0.9999543042663889	0.12475089491116043	8.873078622237019
GOTERM_BP_FAT	GO:0031327~negative regulation of cellular biosynthetic process	24	3.7854889589905363	0.0222254507079711	CLSPN, GMNN, RBL1, TIPIN, SUV39H1, CENPF, HAT1, BRCA2, MXD3, BRCA1, CITED2, CDT1, HES1, DLX2, AHRR, PA2G4, ID2, EREG, TIMELESS, DNMT1, MYC, MYBBP1A, HELLS, HNRNPAB	464	430	13588	1.6344827586206896	1.0	0.3318540972457139	31.77972203198678
GOTERM_BP_FAT	GO:0009890~negative regulation of biosynthetic process	24	3.7854889589905363	0.024546764869231432	CLSPN, GMNN, RBL1, TIPIN, SUV39H1, CENPF, HAT1, BRCA2, MXD3, BRCA1, CITED2, CDT1, HES1, DLX2, AHRR, PA2G4, ID2, EREG, TIMELESS, DNMT1, MYC, MYBBP1A, HELLS, HNRNPAB	464	434	13588	1.619418401398379	1.0	0.3515389390875263	34.483682251869965
GOTERM_BP_FAT	GO:0010558~negative regulation of macromolecule biosynthetic process	23	3.627760252365931	0.029288623749807823	CLSPN, GMNN, RBL1, TIPIN, SUV39H1, CENPF, HAT1, BRCA2, MXD3, CITED2, CDT1, HES1, DLX2, AHRR, PA2G4, ID2, EREG, TIMELESS, DNMT1, MYC, MYBBP1A, HELLS, HNRNPAB	464	418	13588	1.6113471374360668	1.0	0.38742195511860655	39.69679632454471
GOTERM_BP_FAT	GO:0000226~microtubule cytoskeleton organization	22	3.4700315457413247	1.3150718543885922E-10	HAUS4, HAUS3, CCDC99, HAUS5, SPC25, SAC3D1, TUBB5, FBXO5, RANBP1, TUBA1B, KIF11, GM5620, TPX2, KIF18A, NUF2, NUSAP1, NDC80, CENPE, BIRC5, ESPL1, TACC3, CENPJ, GM14150, GM3226, BRCA1	464	111	13588	5.804131717924821	2.4065803450046275E-7	1.2032903118353033E-8	2.2375735708735078E-7
GOTERM_BP_FAT	GO:0043933~macromolecular complex subunit organization	20	3.1545741324921135	0.0466328425312781	GM5620, 1110034A24RIK, KIF18A, MCM2, PDSS1, GM14150, TTF2, GM3226, CENPH, CSE1L, RRM2, IPO5, RRM1, TUBB5, FBXO5, TUBB6, ASF1B, GEMIN6, MYC, KPNB1, TUBA1B, HELLS, DCTPP1	464	367	13588	1.5958846189984028	1.0	0.49477424241434154	55.627356890228775
GOTERM_BP_FAT	GO:0006261~DNA-dependent DNA replication	18	2.8391167192429023	1.1159289571054127E-16	POLA1, TIPIN, BRCA2, MCM2, MCM3, MCM4, MCM5, RAD51, MCM6, PRIM1, CCNE2, DNA2, CCNE1, CDC45, MCM7, POLE2, POLD1, PRIM2	464	34	13588	15.503549695740366	2.0317081350640365E-13	1.2656542480726785E-14	1.887379141862766E-13
GOTERM_BP_FAT	GO:0007126~meiosis	18	2.8391167192429023	5.534892686578758E-9	EXO1, MKI67, NEK2, MRE11A, GM15452, SGOL1, BRCA2, TOPBP1, ESPL1, RAD51, RPA1, EREG, PSMC3IP, CKS2, FBXO5, MNS1, PMS2, FANCA, TRIP13	464	88	13588	5.990007836990595	1.0128802290565453E-5	4.4038484159347746E-7	9.41753350858221E-6
GOTERM_BP_FAT	GO:0051327~M phase of meiotic cell cycle	18	2.8391167192429023	5.534892686578758E-9	EXO1, MKI67, NEK2, MRE11A, GM15452, SGOL1, BRCA2, TOPBP1, ESPL1, RAD51, RPA1, EREG, PSMC3IP, CKS2, FBXO5, MNS1, PMS2, FANCA, TRIP13	464	88	13588	5.990007836990595	1.0128802290565453E-5	4.4038484159347746E-7	9.41753350858221E-6
GOTERM_BP_FAT	GO:0051321~meiotic cell cycle	18	2.8391167192429023	7.92106833368449E-9	EXO1, MKI67, NEK2, MRE11A, GM15452, SGOL1, BRCA2, TOPBP1, ESPL1, RAD51, RPA1, EREG, PSMC3IP, CKS2, FBXO5, MNS1, PMS2, FANCA, TRIP13	464	90	13588	5.856896551724138	1.449545009024611E-5	6.039812822100643E-7	1.3477573990172687E-5
GOTERM_BP_FAT	GO:0006310~DNA recombination	17	2.6813880126182967	3.428495344514534E-9	RECQL4, EXO1, XRCC2, RAD51AP1, BLM, UNG, LIG1, EME1, BRCA2, TOPBP1, RAD54L, RAD51, RPA1, PSMC3IP, PMS2, RAD54B, TRIP13	464	75	13588	6.637816091954023	6.274126867267249E-6	2.8518843886438106E-7	5.833531502297262E-6
GOTERM_BP_FAT	GO:0008284~positive regulation of cell proliferation	17	2.6813880126182967	0.03439428914089738	KLF5, RECQL4, ODC1, GM9115, FGF7, PDGFB, BLM, FOXM1, EFNB1, CSF1, GM7278, TIPIN, CENPF, PRL2C3, HES1, RPA1, EREG, MYC, PRL2C2	464	284	13588	1.7529443904808157	1.0	0.42704704393573967	44.87210714673808
GOTERM_BP_FAT	GO:0007018~microtubule-based movement	16	2.5236593059936907	1.5606006295461029E-6	KIF23, KIF22, KIFC1, KIF11, GM5620, KIF15, KIF5C, KIF18A, KIF18B, CENPE, GM14150, GM3226, KIF2C, KIF4, TUBB5, KIF20B, TUBB6, TUBA1B, KIF20A	464	101	13588	4.639125981563673	0.002851827173536714	9.212160752636311E-5	0.002655304562815264
GOTERM_BP_FAT	GO:0008283~cell proliferation	16	2.5236593059936907	0.02248694882190609	GINS1, MKI67, PDGFB, FST, E2F8, POLA1, BRCA2, RACGAP1, TACC3, GM5648, UHRF1, MCM7, EREG, CSE1L, NCAPG2, TXNRD1, HELLS	464	247	13588	1.8969705430685466	1.0	0.32981434732890436	32.089493565499424
GOTERM_BP_FAT	GO:0007346~regulation of mitotic cell cycle	15	2.365930599369085	4.334370012287722E-6	CDK1, DBF4, CENPF, NUSAP1, BRCA2, CENPE, BIRC5, CDT1, MAD2L1, EREG, MTBP, FBXO5, RANBP1, ZWILCH, MYC	464	96	13588	4.575700431034483	0.00790053968841653	2.3326438705284502E-4	0.007374607335264294
GOTERM_BP_FAT	GO:0022613~ribonucleoprotein complex biogenesis	15	2.365930599369085	2.4042657539904934E-4	EXOSC8, EXOSC2, ERI1, DIMT1, DIS3, MINA, EBNA1BP2, PA2G4, NOP2, DKC1, RRS1, NOP58, GEMIN6, NHP2, GM12571	464	137	13588	3.2063302290460607	0.3559851750138012	0.008426479833982925	0.4082954689479057
GOTERM_BP_FAT	GO:0034660~ncRNA metabolic process	15	2.365930599369085	0.009392736900256334	EXOSC8, EXOSC2, ERI1, TRMT61A, IARS, DIMT1, DIS3, EBNA1BP2, PA2G4, NOP2, DKC1, YARS2, TARSL2, NHP2, GM12571	464	202	13588	2.174590303857972	0.9999999683947347	0.1838652390969303	14.834285753017484
GOTERM_BP_FAT	GO:0043066~negative regulation of apoptosis	15	2.365930599369085	0.0346238582736388	STIL, XRCC2, SKP2, CENPF, COL2A1, BIRC5, GDNF, CITED2, TIMP1, MSX2, BDNF, MYC, HELLS, BARD1, NGF	464	239	13588	1.8379382484489974	1.0	0.4264450071825632	45.094687315447565
GOTERM_BP_FAT	GO:0043069~negative regulation of programmed cell death	15	2.365930599369085	0.03992060655765664	STIL, XRCC2, SKP2, CENPF, COL2A1, BIRC5, GDNF, CITED2, TIMP1, MSX2, BDNF, MYC, HELLS, BARD1, NGF	464	244	13588	1.8002755794234033	1.0	0.4599749613160621	50.00128118595277
GOTERM_BP_FAT	GO:0060548~negative regulation of cell death	15	2.365930599369085	0.04156907119992544	STIL, XRCC2, SKP2, CENPF, COL2A1, BIRC5, GDNF, CITED2, TIMP1, MSX2, BDNF, MYC, HELLS, BARD1, NGF	464	245	13588	1.79292751583392	1.0	0.4710528263268723	51.442064289370414
GOTERM_BP_FAT	GO:0034621~cellular macromolecular complex subunit organization	15	2.365930599369085	0.04156907119992544	GM5620, 1110034A24RIK, KIF18A, MCM2, GM14150, TTF2, GM3226, CENPH, CSE1L, IPO5, TUBB5, FBXO5, TUBB6, ASF1B, GEMIN6, KPNB1, TUBA1B, HELLS	464	245	13588	1.79292751583392	1.0	0.4710528263268723	51.442064289370414
GOTERM_BP_FAT	GO:0010564~regulation of cell cycle process	14	2.2082018927444795	9.41874452978221E-7	RECQL4, DBF4, TIPIN, CENPF, NUSAP1, BRCA2, CENPE, BIRC5, CDT1, PLK4, MAD2L1, EREG, FBXO5, RANBP1	464	73	13588	5.616202172886159	0.0017221464617602766	5.943378755923767E-5	0.0016025726736978996
GOTERM_BP_FAT	GO:0042254~ribosome biogenesis	14	2.2082018927444795	1.1092253143612465E-4	EXOSC8, EXOSC2, ERI1, DIMT1, DIS3, MINA, EBNA1BP2, PA2G4, NOP2, DKC1, RRS1, NOP58, NHP2, GM12571	464	112	13588	3.6605603448275863	0.1837213433701923	0.004403309301041047	0.1885654250381119
GOTERM_BP_FAT	GO:0034654~nucleobase, nucleoside, nucleotide and nucleic acid biosynthetic process	14	2.2082018927444795	0.008343204305827481	DCTD, ATP1B1, CTPS, CAD, PPAT, MTHFD1, TYMS, UMPS, DHFR, ATIC, NME1, RRM2, RRM1, PRPS1	464	179	13588	2.290406472741283	0.9999997805436893	0.16683631104346952	13.28591289327653
GOTERM_BP_FAT	GO:0034404~nucleobase, nucleoside and nucleotide biosynthetic process	14	2.2082018927444795	0.008343204305827481	DCTD, ATP1B1, CTPS, CAD, PPAT, MTHFD1, TYMS, UMPS, DHFR, ATIC, NME1, RRM2, RRM1, PRPS1	464	179	13588	2.290406472741283	0.9999997805436893	0.16683631104346952	13.28591289327653
GOTERM_BP_FAT	GO:0016568~chromatin modification	14	2.2082018927444795	0.06118793014397721	SETDB2, EZH2, RBL1, SUV39H1, HAT1, WHSC1, GSG2, EYA4, CHD1L, BAZ1A, DNMT1, SETD8, ASF1B, HELLS	464	236	13588	1.7372150789012275	1.0	0.5697558170162225	65.84689188582675
GOTERM_BP_FAT	GO:0007051~spindle organization	13	2.050473186119874	3.942388193570782E-11	HAUS4, HAUS3, HAUS5, TPX2, NDC80, ESPL1, TACC3, CENPJ, SPC25, SAC3D1, TUBB5, FBXO5, RANBP1	464	28	13588	13.596366995073891	7.214575015179747E-8	3.797144820794074E-9	6.707916444526063E-8
GOTERM_BP_FAT	GO:0006323~DNA packaging	13	2.050473186119874	1.6184602840389831E-4	SUV39H1, NUSAP1, MCM2, SMC2, NCAPD3, NCAPD2, SMC4, NCAPH, NCAPG2, ASF1B, TOP2A, CDCA5, HELLS	464	101	13588	3.7692898600204847	0.25636295223048844	0.006282357465122956	0.2750219116442021
GOTERM_BP_FAT	GO:0006461~protein complex assembly	13	2.050473186119874	0.08905926290511681	GM5620, 1110034A24RIK, PDSS1, GM14150, GM3226, CSE1L, RRM2, IPO5, RRM1, TUBB5, TUBB6, FBXO5, MYC, KPNB1, TUBA1B, DCTPP1	464	227	13588	1.6770849156919339	1.0	0.681974021371032	79.54823707408381
GOTERM_BP_FAT	GO:0070271~protein complex biogenesis	13	2.050473186119874	0.08905926290511681	GM5620, 1110034A24RIK, PDSS1, GM14150, GM3226, CSE1L, RRM2, IPO5, RRM1, TUBB5, TUBB6, FBXO5, MYC, KPNB1, TUBA1B, DCTPP1	464	227	13588	1.6770849156919339	1.0	0.681974021371032	79.54823707408381
GOTERM_BP_FAT	GO:0051130~positive regulation of cellular component organization	12	1.8927444794952681	0.002990029384291469	PLK4, EREG, SORBS1, TNFRSF12A, TIAM1, NUSAP1, RANBP1, CENPE, PTX3, SIRPA, NGF, PRL2C2	464	122	13588	2.880440927077445	0.9958304637839124	0.07328612977750693	4.967485634291902
GOTERM_BP_FAT	GO:0034470~ncRNA processing	12	1.8927444794952681	0.019410414050390894	DIS3, DIMT1, EBNA1BP2, EXOSC8, PA2G4, NOP2, DKC1, EXOSC2, ERI1, TRMT61A, NHP2, GM12571	464	158	13588	2.2241379310344827	0.9999999999999998	0.3039449341918362	28.3597102671597
GOTERM_BP_FAT	GO:0009165~nucleotide biosynthetic process	12	1.8927444794952681	0.03601679461366937	DCTD, MTHFD1, TYMS, UMPS, ATP1B1, DHFR, ATIC, NME1, CTPS, RRM2, RRM1, PRPS1	464	174	13588	2.0196195005945303	1.0	0.43383666086246686	46.427185258196026
GOTERM_BP_FAT	GO:0051052~regulation of DNA metabolic process	11	1.7350157728706623	2.300972283255327E-5	CLSPN, DNA2, EREG, BLM, USP1, GMNN, PCNA, TIPIN, RAD18, BRCA2, CDT1	464	58	13588	5.553953626634958	0.04123403757568622	0.001168990565218464	0.039143473574621
GOTERM_BP_FAT	GO:0006364~rRNA processing	11	1.7350157728706623	1.947795504799864E-4	DIS3, DIMT1, EBNA1BP2, EXOSC8, PA2G4, NOP2, DKC1, EXOSC2, ERI1, NHP2, GM12571	464	74	13588	4.353098788443615	0.29986443341439695	0.007399183924404973	0.33089798390291136
GOTERM_BP_FAT	GO:0016072~rRNA metabolic process	11	1.7350157728706623	2.180322271605499E-4	DIS3, DIMT1, EBNA1BP2, EXOSC8, PA2G4, NOP2, DKC1, EXOSC2, ERI1, NHP2, GM12571	464	75	13588	4.295057471264368	0.3290378012866805	0.008110653780073251	0.3703314736463459
GOTERM_BP_FAT	GO:0006730~one-carbon metabolic process	11	1.7350157728706623	0.006622043639011159	MTHFD1, MTHFD2, SHMT1, SHMT2, DHFR, EZH2, SUV39H1, DNMT1, TRMT61A, HELLS, MTHFD1L	464	117	13588	2.7532419687592102	0.9999947571324511	0.14433815794562688	10.689199807930095
GOTERM_BP_FAT	GO:0016053~organic acid biosynthetic process	11	1.7350157728706623	0.022446031261129318	BCAT1, MTHFD1, DHFR, SLC1A3, PHGDH, FADS3, ASNS, ELOVL7, PSPH, PSAT1, GM7901, BRCA1	464	141	13588	2.2846050379065788	1.0	0.33191660023487035	32.04111001826799
GOTERM_BP_FAT	GO:0046394~carboxylic acid biosynthetic process	11	1.7350157728706623	0.022446031261129318	BCAT1, MTHFD1, DHFR, SLC1A3, PHGDH, FADS3, ASNS, ELOVL7, PSPH, PSAT1, GM7901, BRCA1	464	141	13588	2.2846050379065788	1.0	0.33191660023487035	32.04111001826799
GOTERM_BP_FAT	GO:0033043~regulation of organelle organization	11	1.7350157728706623	0.03799721197899828	RECQL4, FAM33A, PLK4, MAD2L1, EREG, F630043A04RIK, NUSAP1, RANBP1, CENPE, SKA1, NEXN	464	154	13588	2.0917487684729066	1.0	0.44609020759726725	48.26935679970329
GOTERM_BP_FAT	GO:0006270~DNA replication initiation	10	1.5772870662460567	5.568131127343235E-13	CCNE2, CCNE1, CDC45, MCM7, POLA1, MCM2, MCM3, MCM4, MCM5, MCM6	464	10	13588	29.28448275862069	1.0189016297346143E-9	5.993538998438908E-11	9.473422046823998E-10
GOTERM_BP_FAT	GO:0051329~interphase of mitotic cell cycle	10	1.5772870662460567	3.4974818763551486E-5	DBF4, POLA1, MTBP, SKP2, CENPF, BIRC5, CHEK1, CDCA5, TFDP1, RBBP8	464	49	13588	5.976425052779733	0.061999725775899295	0.0017283705261830207	0.05949244809075882
GOTERM_BP_FAT	GO:0051325~interphase	10	1.5772870662460567	4.875619022542053E-5	DBF4, POLA1, MTBP, SKP2, CENPF, BIRC5, CHEK1, CDCA5, TFDP1, RBBP8	464	51	13588	5.7420554428668025	0.08536116117286752	0.002173877680610836	0.08292552097960426
GOTERM_BP_FAT	GO:0000075~cell cycle checkpoint	10	1.5772870662460567	5.720772537692035E-5	CDK1, CLSPN, MAD2L1, B230120H23RIK, TIPIN, CENPE, BIRC5, CHEK1, ZWILCH, CDT1	464	52	13588	5.631631299734749	0.09939915431957846	0.0024895894403863528	0.09729348017148975
GOTERM_BP_FAT	GO:0051028~mRNA transport	10	1.5772870662460567	2.333814478980261E-4	TMEM48, FMR1, NUP93, MAGOHB, THOC4, NUP85, NUP107, NUP35, NUPL1, NUP43	464	62	13588	4.723303670745272	0.3476264127842801	0.008506372221288583	0.39635369218309346
GOTERM_BP_FAT	GO:0050658~RNA transport	10	1.5772870662460567	3.775789314064011E-4	TMEM48, FMR1, NUP93, MAGOHB, THOC4, NUP85, NUP107, NUP35, NUPL1, NUP43	464	66	13588	4.437042842215257	0.4989753237266271	0.012265231382589947	0.6405059670322566
GOTERM_BP_FAT	GO:0051236~establishment of RNA localization	10	1.5772870662460567	3.775789314064011E-4	TMEM48, FMR1, NUP93, MAGOHB, THOC4, NUP85, NUP107, NUP35, NUPL1, NUP43	464	66	13588	4.437042842215257	0.4989753237266271	0.012265231382589947	0.6405059670322566
GOTERM_BP_FAT	GO:0050657~nucleic acid transport	10	1.5772870662460567	3.775789314064011E-4	TMEM48, FMR1, NUP93, MAGOHB, THOC4, NUP85, NUP107, NUP35, NUPL1, NUP43	464	66	13588	4.437042842215257	0.4989753237266271	0.012265231382589947	0.6405059670322566
GOTERM_BP_FAT	GO:0006403~RNA localization	10	1.5772870662460567	4.2326458205913577E-4	TMEM48, FMR1, NUP93, MAGOHB, THOC4, NUP85, NUP107, NUP35, NUPL1, NUP43	464	67	13588	4.370818322182193	0.5391755708457229	0.013499944716855894	0.7177424091848073
GOTERM_BP_FAT	GO:0009309~amine biosynthetic process	10	1.5772870662460567	8.027502529480329E-4	BCAT1, ODC1, GM9115, SRM, GM7278, ASNS, GM7901, PSPH, MTHFD1, SLC1A3, DHFR, PHGDH, PSAT1	464	73	13588	4.011572980632971	0.769987796306256	0.022355902104689518	1.3571225297288492
GOTERM_BP_FAT	GO:0015931~nucleobase, nucleoside, nucleotide and nucleic acid transport	10	1.5772870662460567	8.869308117565406E-4	TMEM48, FMR1, NUP93, MAGOHB, THOC4, NUP85, NUP107, NUP35, NUPL1, NUP43	464	74	13588	3.957362534948742	0.8028525972506018	0.024302895746523667	1.4984287704950638
GOTERM_BP_FAT	GO:0001763~morphogenesis of a branching structure	10	1.5772870662460567	0.027076051194124606	DLX2, FGF7, PDGFB, TIMELESS, CD44, RSPO3, CSF1, CTNND2, SEMA3A, GDNF	464	125	13588	2.342758620689655	1.0	0.37193661080368745	37.31491360401644
GOTERM_BP_FAT	GO:0050767~regulation of neurogenesis	10	1.5772870662460567	0.03661525525530908	HES1, DLX2, BDNF, XRCC2, TNFRSF12A, TIAM1, SEMA3A, CIT, NGF, PRL2C2	464	132	13588	2.2185214211076283	1.0	0.43653060135837063	46.99027935229185
GOTERM_BP_FAT	GO:0009314~response to radiation	10	1.5772870662460567	0.055860764671414556	XRCC2, SLC1A3, USP1, AEN, TIPIN, RAD18, BRCA2, RAD54B, RAD54L, MYC	464	143	13588	2.047865927176272	1.0	0.5438849970758752	62.3952941695783
GOTERM_BP_FAT	GO:0051960~regulation of nervous system development	10	1.5772870662460567	0.06643939707706109	HES1, DLX2, BDNF, XRCC2, TNFRSF12A, TIAM1, SEMA3A, CIT, NGF, PRL2C2	464	148	13588	1.978681267474371	1.0	0.5928822589189827	68.95586655487665
GOTERM_BP_FAT	GO:0060284~regulation of cell development	10	1.5772870662460567	0.09388966722615434	HES1, DLX2, BDNF, XRCC2, TNFRSF12A, TIAM1, SEMA3A, CIT, NGF, PRL2C2	464	159	13588	1.8417913684667102	1.0	0.6924950098621118	81.31716525430231
GOTERM_BP_FAT	GO:0000070~mitotic sister chromatid segregation	9	1.4195583596214512	5.5441458551479475E-8	CCDC99, MAD2L1, NEK2, KIF18A, NUSAP1, CIT, CDCA5, NCAPD3, SMC4	464	18	13588	14.642241379310345	1.0145272525607929E-4	4.058306642296117E-6	9.433273915337992E-5
GOTERM_BP_FAT	GO:0000819~sister chromatid segregation	9	1.4195583596214512	9.291980626128693E-8	CCDC99, MAD2L1, NEK2, KIF18A, NUSAP1, CIT, CDCA5, NCAPD3, SMC4	464	19	13588	13.871597096188747	1.7002879688321482E-4	6.5401037449008825E-6	1.5810149031070253E-4
GOTERM_BP_FAT	GO:0030261~chromosome condensation	9	1.4195583596214512	3.5916415731200034E-7	NCAPH, NCAPG2, NUSAP1, SMC2, CDCA5, TOP2A, NCAPD3, NCAPD2, SMC4	464	22	13588	11.98001567398119	6.570545709447817E-4	2.347367184263316E-5	6.111104805306411E-4
GOTERM_BP_FAT	GO:0000910~cytokinesis	9	1.4195583596214512	2.145478108900519E-6	PRC1, INCENP, BRCA2, NUSAP1, BIRC5, ANLN, AURKB, RACGAP1, CIT	464	27	13588	9.761494252873565	0.003918531590949681	1.2268713429286482E-4	0.0036504349825050575
GOTERM_BP_FAT	GO:0006302~double-strand break repair	9	1.4195583596214512	8.677768962423195E-5	RPA1, XRCC2, MRE11A, POLA1, BRCA2, RAD54B, RAD54L, RAD51, TRIP13	464	43	13588	6.129310344827586	0.14684160981580685	0.003602813842225716	0.14754833879756513
GOTERM_BP_FAT	GO:0006913~nucleocytoplasmic transport	9	1.4195583596214512	0.016612385612030735	AAAS, CSE1L, GM10184, RAN, IPO5, GM10259, NOP58, POLA2, KPNA2, KPNB1, MYBBP1A	464	96	13588	2.74542025862069	0.9999999999999515	0.27580519583066765	24.800928132633082
GOTERM_BP_FAT	GO:0051169~nuclear transport	9	1.4195583596214512	0.01860063647001202	AAAS, CSE1L, GM10184, RAN, IPO5, GM10259, NOP58, POLA2, KPNA2, KPNB1, MYBBP1A	464	98	13588	2.68939127375088	0.9999999999999988	0.2957412153918637	27.34641041873227
GOTERM_BP_FAT	GO:0006275~regulation of DNA replication	8	1.2618296529968454	1.1707510589158855E-6	CLSPN, DNA2, EREG, GMNN, PCNA, TIPIN, BRCA2, CDT1	464	18	13588	13.015325670498084	0.0021401822290404438	7.141330634496956E-5	0.001991996077777003
GOTERM_BP_FAT	GO:0008652~cellular amino acid biosynthetic process	8	1.2618296529968454	6.54700561650643E-4	BCAT1, MTHFD1, DHFR, SLC1A3, PHGDH, ASNS, PSPH, PSAT1, GM7901	464	44	13588	5.324451410658307	0.6983519679662011	0.019776729901914702	1.1081420242672557
GOTERM_BP_FAT	GO:0032886~regulation of microtubule-based process	8	1.2618296529968454	7.529182898825607E-4	FAM33A, PLK4, F630043A04RIK, CENPF, RANBP1, CENPE, SKA1, TACC3	464	45	13588	5.206130268199233	0.7480083763826965	0.021306603823466608	1.2733842698182896
GOTERM_BP_FAT	GO:0032583~regulation of gene-specific transcription	8	1.2618296529968454	0.0076054446522956795	HES1, DLX2, AHRR, TIMELESS, GM13237, MYC, HNRNPAB, CITED2	464	67	13588	3.496654657745754	0.9999991441406255	0.15492274179895094	12.181681004622845
GOTERM_BP_FAT	GO:0048469~cell maturation	8	1.2618296529968454	0.013781376510960897	HES1, EREG, RPS6KA2, FBXO5, BRCA2, TIMP1, TRIP13, FARP2	464	75	13588	3.1236781609195403	0.9999999999906469	0.24121441029468638	21.03131194523864
GOTERM_BP_FAT	GO:0017038~protein import	8	1.2618296529968454	0.021592374934604558	TIMM8A1, CSE1L, GM10184, RAN, IPO5, GM10259, NOP58, GM9797, POLA2, KPNA2, KPNB1	464	82	13588	2.8570227081581163	1.0	0.32932384749103905	31.02426196273671
GOTERM_BP_FAT	GO:0032880~regulation of protein localization	8	1.2618296529968454	0.03376875955765395	SGK1, SORBS1, PANX1, CENPF, CENPE, TACC3, EDA, BARD1	464	90	13588	2.6030651340996167	1.0	0.42388126949179017	44.26130341086969
GOTERM_BP_FAT	GO:0033365~protein localization in organelle	8	1.2618296529968454	0.04759493755827415	TIMM8A1, CSE1L, GM10184, RAN, IPO5, GM10259, NOP58, GM9797, POLA2, KPNA2, KPNB1	464	97	13588	2.415215072875933	1.0	0.496644715493455	56.38313656298878
GOTERM_BP_FAT	GO:0021700~developmental maturation	8	1.2618296529968454	0.056908470392527194	HES1, EREG, RPS6KA2, FBXO5, BRCA2, TIMP1, TRIP13, FARP2	464	101	13588	2.3195629907818365	1.0	0.5480782723164457	63.09904464348666
GOTERM_BP_FAT	GO:0043623~cellular protein complex assembly	8	1.2618296529968454	0.07575314514773104	CSE1L, GM5620, 1110034A24RIK, IPO5, TUBB5, FBXO5, TUBB6, KPNB1, GM14150, TUBA1B, GM3226	464	108	13588	2.169220945083014	1.0	0.629983807041897	73.82493227318562
GOTERM_BP_FAT	GO:0051225~spindle assembly	7	1.1041009463722398	5.8369492973262216E-6	HAUS4, HAUS3, HAUS5, SAC3D1, TPX2, TUBB5, FBXO5	464	15	13588	13.666091954022988	0.010624802165969838	3.051433882343968E-4	0.009931014444963804
GOTERM_BP_FAT	GO:0051053~negative regulation of DNA metabolic process	7	1.1041009463722398	3.908629712405265E-5	CLSPN, BLM, GMNN, TIPIN, RAD18, BRCA2, CDT1	464	20	13588	10.249568965517241	0.06903102035584918	0.0018805800590953048	0.06648391717879454
GOTERM_BP_FAT	GO:0045787~positive regulation of cell cycle	7	1.1041009463722398	9.048798406105217E-4	EREG, BRCA2, CENPF, NUSAP1, CENPE, BIRC5, CITED2	464	34	13588	6.029158215010143	0.8092286654520385	0.02442336639685272	1.5285335181738913
GOTERM_BP_FAT	GO:0010551~regulation of specific transcription from RNA polymerase II promoter	7	1.1041009463722398	0.007451653209561527	HES1, DLX2, AHRR, TIMELESS, GM13237, MYC, CITED2	464	51	13588	4.019438810006761	0.9999988635333297	0.15373420212654465	11.949834841397477
GOTERM_BP_FAT	GO:0051640~organelle localization	7	1.1041009463722398	0.009813914422873427	CCDC99, KIF18A, CENPF, NUSAP1, BIRC5, TACC3, CDCA5	464	54	13588	3.796136653895275	0.9999999854862675	0.18930424923338596	15.44830010946453
GOTERM_BP_FAT	GO:0006606~protein import into nucleus	7	1.1041009463722398	0.011657815895013132	CSE1L, GM10184, RAN, IPO5, GM10259, NOP58, POLA2, KPNA2, KPNB1	464	56	13588	3.6605603448275863	0.9999999995209091	0.21424782066451364	18.087713765198632
GOTERM_BP_FAT	GO:0051170~nuclear import	7	1.1041009463722398	0.013733324488733158	CSE1L, GM10184, RAN, IPO5, GM10259, NOP58, POLA2, KPNA2, KPNB1	464	58	13588	3.534334126040428	0.9999999999897746	0.24277102518753868	20.96581955633827
GOTERM_BP_FAT	GO:0034504~protein localization in nucleus	7	1.1041009463722398	0.01730988177096907	CSE1L, GM10184, RAN, IPO5, GM10259, NOP58, POLA2, KPNA2, KPNB1	464	61	13588	3.360514414923686	0.9999999999999868	0.28066445292137976	25.70331493889325
GOTERM_BP_FAT	GO:0022612~gland morphogenesis	7	1.1041009463722398	0.06667460166846795	FGF7, PDGFB, CD44, CSF1, TNC, SEMA3A, EDA	464	84	13588	2.440373563218391	1.0	0.5916169670430003	69.08867780955046
GOTERM_BP_FAT	GO:0006916~anti-apoptosis	7	1.1041009463722398	0.07960833760623978	BDNF, SKP2, BIRC5, GDNF, MYC, HELLS, CITED2	464	88	13588	2.3294474921630095	1.0	0.6464713330963303	75.62185407781632
GOTERM_BP_FAT	GO:0001558~regulation of cell growth	7	1.1041009463722398	0.09384853712836094	WISP2, TNFRSF12A, CTGF, SEMA3A, IGFBP2, NGF, CYR61	464	92	13588	2.2281671664167915	1.0	0.6947047069354151	81.30273057020099
GOTERM_BP_FAT	GO:0030334~regulation of cell migration	7	1.1041009463722398	0.09384853712836094	PDGFB, RRAS2, CSF1, SEMA3A, NEXN, THBS1, PRL2C2	464	92	13588	2.2281671664167915	1.0	0.6947047069354151	81.30273057020099
GOTERM_BP_FAT	GO:0000724~double-strand break repair via homologous recombination	6	0.9463722397476341	4.611726718037783E-5	RPA1, XRCC2, BRCA2, RAD54B, RAD54L, RAD51	464	13	13588	13.515915119363395	0.08093326751469354	0.0021076893224862836	0.07843884425197123
GOTERM_BP_FAT	GO:0000725~recombinational repair	6	0.9463722397476341	4.611726718037783E-5	RPA1, XRCC2, BRCA2, RAD54B, RAD54L, RAD51	464	13	13588	13.515915119363395	0.08093326751469354	0.0021076893224862836	0.07843884425197123
GOTERM_BP_FAT	GO:0051297~centrosome organization	6	0.9463722397476341	2.66543905952015E-4	HAUS4, HAUS3, KIF11, HAUS5, SAC3D1, BRCA1	464	18	13588	9.761494252873563	0.38604912748040876	0.00916230315227351	0.4525536464475288
GOTERM_BP_FAT	GO:0006284~base-excision repair	6	0.9463722397476341	3.516786347067792E-4	DNA2, NEIL3, UNG, GM13237, POLD1, PCNA	464	19	13588	9.247731397459164	0.4746471218351914	0.011849331441795896	0.5966936502005638
GOTERM_BP_FAT	GO:0031023~microtubule organizing center organization	6	0.9463722397476341	5.817262901720821E-4	HAUS4, HAUS3, KIF11, HAUS5, SAC3D1, BRCA1	464	21	13588	8.366995073891626	0.6552269388508681	0.017886724013579935	0.9852010415845047
GOTERM_BP_FAT	GO:0009069~serine family amino acid metabolic process	6	0.9463722397476341	7.319401670557396E-4	SHMT1, SHMT2, DHFR, PHGDH, PSPH, PSAT1, GM7901	464	22	13588	7.986677115987461	0.7381388673670796	0.021380085855175812	1.2381123591436394
GOTERM_BP_FAT	GO:0051656~establishment of organelle localization	6	0.9463722397476341	0.005529030868654868	CCDC99, KIF18A, CENPF, NUSAP1, BIRC5, CDCA5	464	34	13588	5.167849898580122	0.9999607752149883	0.1249748537596782	9.002362195329038
GOTERM_BP_FAT	GO:0007127~meiosis I	6	0.9463722397476341	0.006273680441568667	GM15452, CKS2, FBXO5, TOPBP1, ESPL1, RAD51, TRIP13	464	35	13588	5.020197044334975	0.9999900406633602	0.13892307068974352	10.154795825784735
GOTERM_BP_FAT	GO:0070507~regulation of microtubule cytoskeleton organization	6	0.9463722397476341	0.007086002711521733	FAM33A, PLK4, F630043A04RIK, RANBP1, CENPE, SKA1	464	36	13588	4.880747126436781	0.999997770083956	0.14841935106142334	11.396288145972022
GOTERM_BP_FAT	GO:0045785~positive regulation of cell adhesion	6	0.9463722397476341	0.014907665246741812	SMOC2, CSF1, NID1, THBS1, CYR61, CITED2	464	43	13588	4.086206896551724	0.9999999999988444	0.25353661904683844	22.551833256370024
GOTERM_BP_FAT	GO:0031589~cell-substrate adhesion	6	0.9463722397476341	0.04420527296771296	SORBS1, TNFRSF12A, CTGF, NID1, EDA, SIRPA	464	57	13588	3.082577132486388	1.0	0.48141538303092457	53.66520648498223
GOTERM_BP_FAT	GO:0042770~DNA damage response, signal transduction	6	0.9463722397476341	0.04420527296771296	CDK1, AEN, TIPIN, BRCA2, CHEK1, BRCA1	464	57	13588	3.082577132486388	1.0	0.48141538303092457	53.66520648498223
GOTERM_BP_FAT	GO:0031344~regulation of cell projection organization	6	0.9463722397476341	0.04420527296771296	TNFRSF12A, TIAM1, SEMA3A, CIT, NGF, PRL2C2	464	57	13588	3.082577132486388	1.0	0.48141538303092457	53.66520648498223
GOTERM_BP_FAT	GO:0070201~regulation of establishment of protein localization	6	0.9463722397476341	0.09426295763697812	SORBS1, PANX1, CENPF, TACC3, EDA, BARD1	464	71	13588	2.4747450218552696	1.0	0.6916447969074745	81.4476934836503
GOTERM_BP_FAT	GO:0006563~L-serine metabolic process	5	0.7886435331230284	4.291954613068466E-5	SHMT1, SHMT2, PHGDH, PSPH, PSAT1, GM7901	464	7	13588	20.917487684729068	0.07553903787308669	0.0020119337265850357	0.07300184932922393
GOTERM_BP_FAT	GO:0050000~chromosome localization	5	0.7886435331230284	8.352639119680137E-5	CCDC99, KIF18A, CENPF, BIRC5, CDCA5	464	8	13588	18.302801724137932	0.1417498568811265	0.0035485651843869537	0.14202384419055303
GOTERM_BP_FAT	GO:0051303~establishment of chromosome localization	5	0.7886435331230284	8.352639119680137E-5	CCDC99, KIF18A, CENPF, BIRC5, CDCA5	464	8	13588	18.302801724137932	0.1417498568811265	0.0035485651843869537	0.14202384419055303
GOTERM_BP_FAT	GO:0001556~oocyte maturation	5	0.7886435331230284	2.372808770980807E-4	EREG, RPS6KA2, FBXO5, BRCA2, TRIP13	464	10	13588	14.642241379310345	0.3522662390357508	0.008479054781224571	0.40296354931305123
GOTERM_BP_FAT	GO:0008156~negative regulation of DNA replication	5	0.7886435331230284	3.628580177663691E-4	CLSPN, GMNN, TIPIN, BRCA2, CDT1	464	11	13588	13.311128526645769	0.48528950190518594	0.012002850970752932	0.6156066547564398
GOTERM_BP_FAT	GO:0006268~DNA unwinding during replication	5	0.7886435331230284	3.628580177663691E-4	MCM7, MCM2, MCM4, MCM6, RAD51	464	11	13588	13.311128526645769	0.48528950190518594	0.012002850970752932	0.6156066547564398
GOTERM_BP_FAT	GO:0032508~DNA duplex unwinding	5	0.7886435331230284	5.296891498695753E-4	MCM7, MCM2, MCM4, MCM6, RAD51	464	12	13588	12.201867816091955	0.6207607312177014	0.016578079511946564	0.8974453455640741
GOTERM_BP_FAT	GO:0032392~DNA geometric change	5	0.7886435331230284	7.446099866339764E-4	MCM7, MCM2, MCM4, MCM6, RAD51	464	13	13588	11.263262599469497	0.7441448573823662	0.02140479879095225	1.2594163862263863
GOTERM_BP_FAT	GO:0048599~oocyte development	5	0.7886435331230284	0.00222416866591865	EREG, RPS6KA2, FBXO5, BRCA2, TRIP13	464	17	13588	8.613083164300203	0.9830037376196308	0.05654903143604939	3.717733503764542
GOTERM_BP_FAT	GO:0009994~oocyte differentiation	5	0.7886435331230284	0.002783490025917009	EREG, RPS6KA2, FBXO5, BRCA2, TRIP13	464	18	13588	8.134578544061304	0.9939086721453534	0.06932347365386637	4.631961245791838
GOTERM_BP_FAT	GO:0010811~positive regulation of cell-substrate adhesion	5	0.7886435331230284	0.012540086708281606	SMOC2, CSF1, NID1, THBS1, CYR61	464	27	13588	5.423052362707536	0.9999999999065374	0.22631773682617196	19.32300693360942
GOTERM_BP_FAT	GO:0006220~pyrimidine nucleotide metabolic process	5	0.7886435331230284	0.012540086708281606	TYMS, UMPS, NME1, CTPS, DUT	464	27	13588	5.423052362707536	0.9999999999065374	0.22631773682617196	19.32300693360942
GOTERM_BP_FAT	GO:0031570~DNA integrity checkpoint	5	0.7886435331230284	0.024931146037217525	CDK1, CLSPN, TIPIN, CHEK1, CDT1	464	33	13588	4.437042842215257	1.0	0.3532990598830934	34.92157051766337
GOTERM_BP_FAT	GO:0048477~oogenesis	5	0.7886435331230284	0.04278564497785156	EREG, RPS6KA2, FBXO5, BRCA2, TRIP13	464	39	13588	3.754420866489832	1.0	0.4755155797515134	52.480207407677845
GOTERM_BP_FAT	GO:0010810~regulation of cell-substrate adhesion	5	0.7886435331230284	0.04630954361537062	SMOC2, CSF1, NID1, THBS1, CYR61	464	40	13588	3.6605603448275863	1.0	0.4950219366429146	55.370632552058794
GOTERM_BP_FAT	GO:0050769~positive regulation of neurogenesis	5	0.7886435331230284	0.049990095589608	XRCC2, TNFRSF12A, TIAM1, NGF, PRL2C2	464	41	13588	3.5712783851976457	1.0	0.5114894804462231	58.212379503442
GOTERM_BP_FAT	GO:0009451~RNA modification	5	0.7886435331230284	0.053826667744712044	DIMT1, DKC1, TRMT61A, NHP2, PUS7	464	42	13588	3.4862479474548445	1.0	0.5329414443039995	60.99275770263684
GOTERM_BP_FAT	GO:0009064~glutamine family amino acid metabolic process	5	0.7886435331230284	0.057818360308230614	SLC1A3, CTPS, PHGDH, ASNS, CAD, GM7901	464	43	13588	3.4051724137931036	1.0	0.5512972648535268	63.700147376395456
GOTERM_BP_FAT	GO:0010720~positive regulation of cell development	5	0.7886435331230284	0.0753096436313547	XRCC2, TNFRSF12A, TIAM1, NGF, PRL2C2	464	47	13588	3.1153705062362436	1.0	0.6302825010497897	73.61040008779219
GOTERM_BP_FAT	GO:0010975~regulation of neuron projection development	5	0.7886435331230284	0.0753096436313547	TNFRSF12A, TIAM1, SEMA3A, CIT, NGF	464	47	13588	3.1153705062362436	1.0	0.6302825010497897	73.61040008779219
GOTERM_BP_FAT	GO:0010212~response to ionizing radiation	5	0.7886435331230284	0.08005490823057773	XRCC2, AEN, BRCA2, RAD54B, RAD54L	464	48	13588	3.0504669540229887	1.0	0.6461063946521115	75.82232881400003
GOTERM_BP_FAT	GO:0007160~cell-matrix adhesion	5	0.7886435331230284	0.08997728732778128	SORBS1, CTGF, NID1, EDA, SIRPA	464	50	13588	2.928448275862069	1.0	0.6834537105126077	79.89611091354995
GOTERM_BP_FAT	GO:0043524~negative regulation of neuron apoptosis	5	0.7886435331230284	0.08997728732778128	BDNF, XRCC2, BIRC5, GDNF, NGF	464	50	13588	2.928448275862069	1.0	0.6834537105126077	79.89611091354995
GOTERM_BP_FAT	GO:0010769~regulation of cell morphogenesis involved in differentiation	5	0.7886435331230284	0.08997728732778128	TNFRSF12A, TIAM1, SEMA3A, CIT, NGF	464	50	13588	2.928448275862069	1.0	0.6834537105126077	79.89611091354995
GOTERM_BP_FAT	GO:0051310~metaphase plate congression	4	0.6309148264984227	7.279898105613518E-4	CCDC99, KIF18A, CENPF, CDCA5	464	6	13588	19.522988505747126	0.736237581406739	0.02161071645959367	1.2314690355911706
GOTERM_BP_FAT	GO:0007076~mitotic chromosome condensation	4	0.6309148264984227	0.001241792508897123	NUSAP1, CDCA5, NCAPD3, SMC4	464	7	13588	16.733990147783253	0.8970891742292935	0.03288667169629644	2.092011038365771
GOTERM_BP_FAT	GO:0009070~serine family amino acid biosynthetic process	4	0.6309148264984227	0.0019367521795008588	DHFR, PHGDH, PSPH, PSAT1, GM7901	464	8	13588	14.642241379310343	0.9712090189734677	0.05011641312181303	3.2447401671140574
GOTERM_BP_FAT	GO:0006544~glycine metabolic process	4	0.6309148264984227	0.006872657149410627	SHMT1, SHMT2, DHFR, PHGDH, GM7901	464	12	13588	9.761494252873563	0.9999966960115673	0.1459407878621819	11.071799676424787
GOTERM_BP_FAT	GO:0033261~regulation of S phase	4	0.6309148264984227	0.006872657149410627	DBF4, TIPIN, BRCA2, CDT1	464	12	13588	9.761494252873563	0.9999966960115673	0.1459407878621819	11.071799676424787
GOTERM_BP_FAT	GO:0006541~glutamine metabolic process	4	0.6309148264984227	0.025379070869870905	CTPS, PHGDH, ASNS, CAD, GM7901	464	19	13588	6.165154264972776	1.0	0.35574212365939595	35.42837228838622
GOTERM_BP_FAT	GO:0006221~pyrimidine nucleotide biosynthetic process	4	0.6309148264984227	0.02912078973288472	TYMS, UMPS, NME1, CTPS	464	20	13588	5.856896551724137	1.0	0.38838852492027953	39.519148613377375
GOTERM_BP_FAT	GO:0010553~negative regulation of specific transcription from RNA polymerase II promoter	4	0.6309148264984227	0.033137303332607046	HES1, AHRR, TIMELESS, MYC	464	21	13588	5.577996715927751	1.0	0.42058792085621066	43.638255929662904
GOTERM_BP_FAT	GO:0031346~positive regulation of cell projection organization	4	0.6309148264984227	0.041983786626286546	TNFRSF12A, TIAM1, NGF, PRL2C2	464	23	13588	5.09295352323838	1.0	0.4717196109211935	51.79832954654533
GOTERM_BP_FAT	GO:0009262~deoxyribonucleotide metabolic process	4	0.6309148264984227	0.041983786626286546	TYMS, RRM2, RRM1, DUT	464	23	13588	5.09295352323838	1.0	0.4717196109211935	51.79832954654533
GOTERM_BP_FAT	GO:0032582~negative regulation of gene-specific transcription	4	0.6309148264984227	0.041983786626286546	HES1, AHRR, TIMELESS, MYC	464	23	13588	5.09295352323838	1.0	0.4717196109211935	51.79832954654533
GOTERM_BP_FAT	GO:0007093~mitotic cell cycle checkpoint	4	0.6309148264984227	0.046806275279912615	CDK1, MAD2L1, CENPE, ZWILCH	464	24	13588	4.880747126436781	1.0	0.4934023467029015	55.764502433103644
GOTERM_BP_FAT	GO:0007435~salivary gland morphogenesis	4	0.6309148264984227	0.06281154705823831	FGF7, PDGFB, SEMA3A, EDA	464	27	13588	4.338441890166028	1.0	0.5769413485727264	66.83808734782326
GOTERM_BP_FAT	GO:0007431~salivary gland development	4	0.6309148264984227	0.08750658339319341	FGF7, PDGFB, SEMA3A, EDA	464	31	13588	3.778642936596218	1.0	0.6777105366755194	78.94694151500858
GOTERM_BP_FAT	GO:0045005~maintenance of fidelity during DNA-dependent DNA replication	3	0.47318611987381703	0.0033972535912802472	POLD1, TIPIN, BRCA2	464	3	13588	29.28448275862069	0.9980257335538294	0.08177150927219012	5.625771416801362
GOTERM_BP_FAT	GO:0006564~L-serine biosynthetic process	3	0.47318611987381703	0.0033972535912802472	PHGDH, PSPH, PSAT1, GM7901	464	3	13588	29.28448275862069	0.9980257335538294	0.08177150927219012	5.625771416801362
GOTERM_BP_FAT	GO:0007080~mitotic metaphase plate congression	3	0.47318611987381703	0.0066412427076032185	CCDC99, KIF18A, CDCA5	464	4	13588	21.963362068965516	0.9999949393256676	0.14303188572883752	10.71856483484419
GOTERM_BP_FAT	GO:0000076~DNA replication checkpoint	3	0.47318611987381703	0.0066412427076032185	CLSPN, TIPIN, CDT1	464	4	13588	21.963362068965516	0.9999949393256676	0.14303188572883752	10.71856483484419
GOTERM_BP_FAT	GO:0032297~negative regulation of DNA replication initiation	3	0.47318611987381703	0.0066412427076032185	CLSPN, TIPIN, CDT1	464	4	13588	21.963362068965516	0.9999949393256676	0.14303188572883752	10.71856483484419
GOTERM_BP_FAT	GO:0000089~mitotic metaphase	3	0.47318611987381703	0.0066412427076032185	RPS6KA2, FBXO5, NDC80	464	4	13588	21.963362068965516	0.9999949393256676	0.14303188572883752	10.71856483484419
GOTERM_BP_FAT	GO:0030174~regulation of DNA replication initiation	3	0.47318611987381703	0.010819773250444531	CLSPN, TIPIN, CDT1	464	5	13588	17.570689655172412	0.9999999977404063	0.20453506767594298	16.897877883558454
GOTERM_BP_FAT	GO:0007098~centrosome cycle	3	0.47318611987381703	0.021715213955469527	KIF11, SAC3D1, BRCA1	464	7	13588	12.55049261083744	1.0	0.32819604434623983	31.17146077632531
GOTERM_BP_FAT	GO:0051323~metaphase	3	0.47318611987381703	0.021715213955469527	RPS6KA2, FBXO5, NDC80	464	7	13588	12.55049261083744	1.0	0.32819604434623983	31.17146077632531
GOTERM_BP_FAT	GO:0033205~cytokinesis during cell cycle	3	0.47318611987381703	0.021715213955469527	BRCA2, NUSAP1, RACGAP1	464	7	13588	12.55049261083744	1.0	0.32819604434623983	31.17146077632531
GOTERM_BP_FAT	GO:0009396~folic acid and derivative biosynthetic process	3	0.47318611987381703	0.02830803454661188	MTHFD1, MTHFD2, MTHFD1L	464	8	13588	10.981681034482758	1.0	0.38252699339717444	38.65187912063561
GOTERM_BP_FAT	GO:0031577~spindle checkpoint	3	0.47318611987381703	0.02830803454661188	MAD2L1, CENPE, BIRC5	464	8	13588	10.981681034482758	1.0	0.38252699339717444	38.65187912063561
GOTERM_BP_FAT	GO:0000154~rRNA modification	3	0.47318611987381703	0.02830803454661188	DIMT1, DKC1, NHP2	464	8	13588	10.981681034482758	1.0	0.38252699339717444	38.65187912063561
GOTERM_BP_FAT	GO:0009263~deoxyribonucleotide biosynthetic process	3	0.47318611987381703	0.02830803454661188	TYMS, RRM2, RRM1	464	8	13588	10.981681034482758	1.0	0.38252699339717444	38.65187912063561
GOTERM_BP_FAT	GO:0046112~nucleobase biosynthetic process	3	0.47318611987381703	0.03558690796094465	UMPS, CAD, PPAT	464	9	13588	9.761494252873563	1.0	0.43264001534480623	46.01923382588203
GOTERM_BP_FAT	GO:0002566~somatic diversification of immune receptors via somatic mutation	3	0.47318611987381703	0.03558690796094465	EXO1, UNG, PMS2	464	9	13588	9.761494252873563	1.0	0.43264001534480623	46.01923382588203
GOTERM_BP_FAT	GO:0016446~somatic hypermutation of immunoglobulin genes	3	0.47318611987381703	0.03558690796094465	EXO1, UNG, PMS2	464	9	13588	9.761494252873563	1.0	0.43264001534480623	46.01923382588203
GOTERM_BP_FAT	GO:0007131~reciprocal meiotic recombination	3	0.47318611987381703	0.03558690796094465	TOPBP1, RAD51, TRIP13	464	9	13588	9.761494252873563	1.0	0.43264001534480623	46.01923382588203
GOTERM_BP_FAT	GO:0001833~inner cell mass cell proliferation	3	0.47318611987381703	0.043497637332806725	GINS1, NCAPG2, BRCA2	464	10	13588	8.785344827586206	1.0	0.4785127077972855	53.07804593609984
GOTERM_BP_FAT	GO:0051148~negative regulation of muscle cell differentiation	3	0.47318611987381703	0.043497637332806725	EREG, EZH2, PRL2C2	464	10	13588	8.785344827586206	1.0	0.4785127077972855	53.07804593609984
GOTERM_BP_FAT	GO:0007090~regulation of S phase of mitotic cell cycle	3	0.47318611987381703	0.05198890892936535	DBF4, BRCA2, CDT1	464	11	13588	7.986677115987461	1.0	0.5229656386071464	59.683398871223694
GOTERM_BP_FAT	GO:0001522~pseudouridine synthesis	3	0.47318611987381703	0.0705214480093442	DKC1, NHP2, PUS7	464	13	13588	6.757957559681698	1.0	0.6077591584511681	71.18637778772174
GOTERM_BP_FAT	GO:0006760~folic acid and derivative metabolic process	3	0.47318611987381703	0.0705214480093442	MTHFD1, MTHFD2, MTHFD1L	464	13	13588	6.757957559681698	1.0	0.6077591584511681	71.18637778772174
GOTERM_BP_FAT	GO:0050772~positive regulation of axonogenesis	3	0.47318611987381703	0.09082676912435923	TNFRSF12A, TIAM1, NGF	464	15	13588	5.856896551724137	1.0	0.6846229095719841	80.21304337680178
GOTERM_BP_FAT	GO:0007143~female meiosis	3	0.47318611987381703	0.09082676912435923	EREG, FBXO5, TRIP13	464	15	13588	5.856896551724137	1.0	0.6846229095719841	80.21304337680178
GOTERM_BP_FAT	GO:0000059~protein import into nucleus, docking	3	0.47318611987381703	0.09082676912435923	CSE1L, IPO5, KPNB1	464	15	13588	5.856896551724137	1.0	0.6846229095719841	80.21304337680178
GOTERM_BP_FAT	GO:0045840~positive regulation of mitosis	3	0.47318611987381703	0.09082676912435923	EREG, NUSAP1, CENPE	464	15	13588	5.856896551724137	1.0	0.6846229095719841	80.21304337680178
GOTERM_BP_FAT	GO:0051785~positive regulation of nuclear division	3	0.47318611987381703	0.09082676912435923	EREG, NUSAP1, CENPE	464	15	13588	5.856896551724137	1.0	0.6846229095719841	80.21304337680178
GOTERM_BP_FAT	GO:0048478~replication fork protection	2	0.31545741324921134	0.06698973864898496	TIPIN, BRCA2	464	2	13588	29.284482758620687	1.0	0.590817980069763	69.26578575776851
GOTERM_BP_FAT	GO:0040001~establishment of mitotic spindle localization	2	0.31545741324921134	0.06698973864898496	CCDC99, NUSAP1	464	2	13588	29.284482758620687	1.0	0.590817980069763	69.26578575776851
GOTERM_BP_FAT	GO:0022616~DNA strand elongation	2	0.31545741324921134	0.06698973864898496	DNA2, POLA1	464	2	13588	29.284482758620687	1.0	0.590817980069763	69.26578575776851
GOTERM_BP_FAT	GO:0046607~positive regulation of centrosome cycle	2	0.31545741324921134	0.06698973864898496	PLK4, RANBP1	464	2	13588	29.284482758620687	1.0	0.590817980069763	69.26578575776851
GOTERM_BP_FAT	GO:0000090~mitotic anaphase	2	0.31545741324921134	0.06698973864898496	FAM33A, SKA1	464	2	13588	29.284482758620687	1.0	0.590817980069763	69.26578575776851
GOTERM_BP_FAT	GO:0051322~anaphase	2	0.31545741324921134	0.06698973864898496	FAM33A, SKA1	464	2	13588	29.284482758620687	1.0	0.590817980069763	69.26578575776851
GOTERM_BP_FAT	GO:0006271~DNA strand elongation during DNA replication	2	0.31545741324921134	0.06698973864898496	DNA2, POLA1	464	2	13588	29.284482758620687	1.0	0.590817980069763	69.26578575776851
GOTERM_BP_FAT	GO:0006273~lagging strand elongation	2	0.31545741324921134	0.06698973864898496	DNA2, POLA1	464	2	13588	29.284482758620687	1.0	0.590817980069763	69.26578575776851
GOTERM_BP_FAT	GO:0008608~attachment of spindle microtubules to kinetochore	2	0.31545741324921134	0.09878598117895816	NUF2, CENPE	464	3	13588	19.522988505747126	1.0	0.7071277357862122	82.96255799557825
GOTERM_BP_FAT	GO:0000084~S phase of mitotic cell cycle	2	0.31545741324921134	0.09878598117895816	POLA1, TFDP1	464	3	13588	19.522988505747126	1.0	0.7071277357862122	82.96255799557825
GOTERM_BP_FAT	GO:0051320~S phase	2	0.31545741324921134	0.09878598117895816	POLA1, TFDP1	464	3	13588	19.522988505747126	1.0	0.7071277357862122	82.96255799557825
GOTERM_BP_FAT	GO:0007089~traversing start control point of mitotic cell cycle	2	0.31545741324921134	0.09878598117895816	DBF4, MTBP	464	3	13588	19.522988505747126	1.0	0.7071277357862122	82.96255799557825
GOTERM_BP_FAT	GO:0045740~positive regulation of DNA replication	2	0.31545741324921134	0.09878598117895816	DNA2, EREG	464	3	13588	19.522988505747126	1.0	0.7071277357862122	82.96255799557825
GOTERM_BP_FAT	GO:0051313~attachment of spindle microtubules to chromosome	2	0.31545741324921134	0.09878598117895816	NUF2, CENPE	464	3	13588	19.522988505747126	1.0	0.7071277357862122	82.96255799557825

## Sheet: CC-FAT-Down in dense
Category	Term	Count	%	PValue	Genes	List Total	Pop Hits	Pop Total	Fold Enrichment	Bonferroni	Benjamini	FDR
GOTERM_CC_FAT	GO:0043228~non-membrane-bounded organelle	169	26.65615141955836	2.815163233485862E-46	KIFC1, PRC1, GM13237, KNTC1, PDLIM1, AURKA, RANGAP1, AURKB, CITED2, PRIM1, EBNA1BP2, CDCA8, OIP5, INCENP, PRIM2, DDX21, GNL3, OXR1, ENC1, KIF5C, FMR1, SGOL1, TOPBP1, SPIRE1, TACC3, GM3226, NCAPD3, GM9430, FARP2, NCAPD2, RFC5, PA2G4, MAD2L1, RND1, RFC4, NOP2, BAZ1A, NME1, SPAG5, RAD18, MYBBP1A, NUP43, CCDC99, BLM, LMNB1, LMNB2, NEK2, TIPIN, CHEK1, ANLN, SPC24, SPC25, SAC3D1, MNS1, FBXO5, SKA1, ASF…	362	1919	12504	3.0419503712511404	7.516485833407252E-44	7.516485833407252E-44	3.694997106119134E-43
GOTERM_CC_FAT	GO:0043232~intracellular non-membrane-bounded organelle	169	26.65615141955836	2.815163233485862E-46	KIFC1, PRC1, GM13237, KNTC1, PDLIM1, AURKA, RANGAP1, AURKB, CITED2, PRIM1, EBNA1BP2, CDCA8, OIP5, INCENP, PRIM2, DDX21, GNL3, OXR1, ENC1, KIF5C, FMR1, SGOL1, TOPBP1, SPIRE1, TACC3, GM3226, NCAPD3, GM9430, FARP2, NCAPD2, RFC5, PA2G4, MAD2L1, RND1, RFC4, NOP2, BAZ1A, NME1, SPAG5, RAD18, MYBBP1A, NUP43, CCDC99, BLM, LMNB1, LMNB2, NEK2, TIPIN, CHEK1, ANLN, SPC24, SPC25, SAC3D1, MNS1, FBXO5, SKA1, ASF…	362	1919	12504	3.0419503712511404	7.516485833407252E-44	7.516485833407252E-44	3.694997106119134E-43
GOTERM_CC_FAT	GO:0005856~cytoskeleton	81	12.77602523659306	1.1794276029641991E-14	KIF23, KIFC1, KIF22, PRC1, KNTC1, RANGAP1, AURKA, PDLIM1, AURKB, GTSE1, FAM83D, KIF2C, CDCA8, PLCB4, INCENP, TUBB5, TUBB6, GM5593, RANBP1, LMOD1, ZYX, MYC, TUBA1B, CDC6, KIF11, ACTA2, MICAL2, ENC1, KIF15, KIF5C, TPX2, NUSAP1, SPIRE1, TOPBP1, NUP85, TACC3, NEXN, GM9430, GM3226, FARP2, SASS6, MAD2L1, RND1, SPAG5, NME1, HAUS4, HAUS3, CCDC99, HAUS5, LMNB1, NEK2, LMNB2, CHEK1, ANLN, CEP55, IVNS1ABP, A…	362	1122	12504	2.4936331137176118	3.142153204294118E-12	2.617905892066119E-13	1.5443202272535927E-11
GOTERM_CC_FAT	GO:0005694~chromosome	78	12.302839116719243	2.4475544739445763E-44	CLSPN, KIF22, GM13237, KNTC1, RANGAP1, AURKB, CITED2, PRIM1, CDCA8, OIP5, FANCI, INCENP, PRIM2, TOP2A, SGOL1, TOPBP1, NUP85, MCM2, NCAPD3, CDK2, RAD51, NCAPD2, RFC5, BAZ1A, MAD2L1, RFC4, APITD1, SPAG5, NSL1, RAD18, BUB1B, NUP107, LIN54, NUP43, CCDC99, BLM, NEK2, POLA1, TIPIN, CHEK1, POLA2, C79407, SPC24, RPA1, RPA2, SPC25, F630043A04RIK, BUB1, SKA1, ZWILCH, ASF1B, HELLS, ERCC6L, FAM33A, CENPO, CE…	362	378	12504	7.127598000526177	6.534970445432018E-42	3.267485222716009E-42	3.212498156668459E-41
GOTERM_CC_FAT	GO:0044427~chromosomal part	66	10.410094637223976	2.2315851952755415E-37	KIF22, KNTC1, RANGAP1, AURKB, CITED2, PRIM1, CDCA8, OIP5, INCENP, PRIM2, SGOL1, NUP85, MCM2, NCAPD3, CDK2, RAD51, RFC5, MAD2L1, RFC4, APITD1, SPAG5, NSL1, BUB1B, RAD18, NUP107, NUP43, CCDC99, BLM, NEK2, TIPIN, POLA1, CHEK1, POLA2, C79407, SPC24, RPA1, SPC25, RPA2, F630043A04RIK, BUB1, SKA1, ZWILCH, ASF1B, HELLS, ERCC6L, FAM33A, CENPO, CENPN, CENPM, MKI67, CENPQ, CENPP, SUV39H1, NUF2, CENPF, CENPE…	362	318	12504	7.168977379339101	5.958332471385696E-35	1.489583117846424E-35	2.9290311625700047E-34
GOTERM_CC_FAT	GO:0044430~cytoskeletal part	65	10.25236593059937	1.0977624593870678E-14	KIF23, KIFC1, KIF22, PRC1, KNTC1, AURKA, AURKB, GTSE1, FAM83D, KIF2C, CDCA8, PLCB4, INCENP, TUBB5, GM5593, TUBB6, RANBP1, MYC, TUBA1B, CDC6, KIF11, KIF15, KIF5C, TPX2, NUSAP1, NUP85, TACC3, GM9430, GM3226, SASS6, MAD2L1, SPAG5, NME1, HAUS4, HAUS3, CCDC99, HAUS5, LMNB1, NEK2, LMNB2, ANLN, CEP55, ANKRD32, SORBS1, SAC3D1, KIF4, F630043A04RIK, FBXO5, MNS1, SKA1, CKAP2, FAM33A, GM5620, DLGAP5, KIF18A,…	362	774	12504	2.900766628121119	2.9346525209916763E-12	2.667865928174251E-13	1.4421797089880783E-11
GOTERM_CC_FAT	GO:0031974~membrane-enclosed lumen	65	10.25236593059937	4.051823902717821E-7	E2F7, LYAR, EZH2, E2F8, TCOF1, GM10053, PDLIM1, HSPE1-RS1, EBNA1BP2, BDNF, CDCA8, DKC1, OIP5, GRWD1, AEN, CPOX, DDX21, MYC, GM11585, TOP2A, OXR1, GNL3, EXOSC8, FMR1, RBL1, CYCS, EXOSC2, NUSAP1, GM9797, GM10108, TIMM23, CDK2, PA2G4, NOP2, TIMM8A1, NRM, NOL10, THOC4, YARS2, NHP2, MYBBP1A, NGF, LMNB1, LMNB2, LIN9, POLA1, ERI1, CHEK1, DIMT1, RPA1, MINA, WDHD1, GEMIN6, TFDP1, RRP12, MKI67, EME1, PNO1,…	362	1174	12504	1.9124304686249967	1.0817786848116295E-4	5.151592450958198E-6	5.318143062149616E-4
GOTERM_CC_FAT	GO:0070013~intracellular organelle lumen	62	9.779179810725552	1.2080396006508017E-6	E2F7, LYAR, TCOF1, E2F8, EZH2, GM10053, PDLIM1, HSPE1-RS1, EBNA1BP2, BDNF, CDCA8, DKC1, OIP5, GRWD1, AEN, DDX21, MYC, GM11585, TOP2A, OXR1, GNL3, EXOSC8, FMR1, RBL1, CYCS, EXOSC2, NUSAP1, GM10108, CDK2, PA2G4, NOP2, NRM, NOL10, THOC4, YARS2, NHP2, MYBBP1A, NGF, LMNB1, LMNB2, LIN9, POLA1, ERI1, CHEK1, DIMT1, MINA, RPA1, WDHD1, GEMIN6, TFDP1, RRP12, MKI67, EME1, PNO1, CENPF, RPF2, DIS3, DNA2, PLK4,…	362	1133	12504	1.8901756935335223	3.2249475559142926E-4	1.2901787499575157E-5	0.001585581284857529
GOTERM_CC_FAT	GO:0043233~organelle lumen	62	9.779179810725552	1.3258621347626392E-6	E2F7, LYAR, TCOF1, E2F8, EZH2, GM10053, PDLIM1, HSPE1-RS1, EBNA1BP2, BDNF, CDCA8, DKC1, OIP5, GRWD1, AEN, DDX21, MYC, GM11585, TOP2A, OXR1, GNL3, EXOSC8, FMR1, RBL1, CYCS, EXOSC2, NUSAP1, GM10108, CDK2, PA2G4, NOP2, NRM, NOL10, THOC4, YARS2, NHP2, MYBBP1A, NGF, LMNB1, LMNB2, LIN9, POLA1, ERI1, CHEK1, DIMT1, MINA, RPA1, WDHD1, GEMIN6, TFDP1, RRP12, MKI67, EME1, PNO1, CENPF, RPF2, DIS3, DNA2, PLK4,…	362	1136	12504	1.8851840323710218	3.539427721321875E-4	1.3615500564334582E-5	0.0017402249763098787
GOTERM_CC_FAT	GO:0015630~microtubule cytoskeleton	58	9.14826498422713	9.998569259307939E-22	KIF23, KIFC1, KIF22, PRC1, KNTC1, AURKA, AURKB, GTSE1, FAM83D, KIF2C, CDCA8, INCENP, TUBB5, GM5593, TUBB6, RANBP1, TUBA1B, MYC, CDC6, KIF11, KIF15, KIF5C, TPX2, NUSAP1, NUP85, TACC3, GM9430, GM3226, SASS6, MAD2L1, SPAG5, NME1, HAUS4, HAUS3, CCDC99, HAUS5, NEK2, CEP55, ANKRD32, SAC3D1, KIF4, F630043A04RIK, FBXO5, SKA1, CKAP2, FAM33A, GM5620, DLGAP5, KIF18A, CENPF, KIF18B, CENPE, BIRC5, RACGAP1, GM…	362	450	12504	4.452007366482505	2.6696179922352197E-19	2.6696179922352196E-20	1.312346084909897E-18
GOTERM_CC_FAT	GO:0031981~nuclear lumen	55	8.675078864353312	1.0390179501162191E-7	E2F7, LYAR, TCOF1, E2F8, EZH2, PDLIM1, EBNA1BP2, CDCA8, DKC1, OIP5, GRWD1, AEN, DDX21, GM11585, TOP2A, MYC, OXR1, GNL3, EXOSC8, RBL1, FMR1, EXOSC2, NUSAP1, CDK2, PA2G4, NOP2, NRM, NOL10, THOC4, NHP2, MYBBP1A, LMNB1, LMNB2, LIN9, POLA1, ERI1, CHEK1, DIMT1, MINA, RPA1, WDHD1, GEMIN6, TFDP1, RRP12, MKI67, EME1, PNO1, CENPF, RPF2, DIS3, PLK4, PCNA, NOP58, RRS1, GM7879, UTP20	362	883	12504	2.1515051025196623	2.7741395921654366E-5	1.5412088524291434E-6	1.3637453972759062E-4
GOTERM_CC_FAT	GO:0000775~chromosome, centromeric region	45	7.097791798107256	4.1125693367727915E-39	CCDC99, NEK2, KNTC1, RANGAP1, AURKB, C79407, SPC24, SPC25, CDCA8, OIP5, INCENP, F630043A04RIK, BUB1, SKA1, ZWILCH, HELLS, ERCC6L, CENPO, FAM33A, CENPN, CENPM, MKI67, CENPQ, SGOL1, CENPP, NUF2, SUV39H1, CENPF, NUP85, NDC80, CENPE, BIRC5, CENPK, MLF1IP, CENPI, 2610039C10RIK, CENPH, MAD2L1, APITD1, SPAG5, NSL1, DNMT1, BUB1B, NUP107, NUP43	362	111	12504	14.00328505300881	1.0980560129183353E-36	3.6601867097277845E-37	5.3978865656303215E-36
GOTERM_CC_FAT	GO:0000793~condensed chromosome	39	6.151419558359621	9.844721108373117E-32	CCDC99, NEK2, GM13237, KNTC1, RANGAP1, RPA1, SPC24, SPC25, INCENP, F630043A04RIK, BUB1, SKA1, ZWILCH, TOP2A, ERCC6L, FAM33A, CENPN, CENPM, MKI67, SGOL1, NUF2, CENPF, NUP85, NDC80, CENPE, TOPBP1, MLF1IP, NCAPD3, BRCA1, CDK2, NCAPD2, CENPH, RAD51, MAD2L1, SPAG5, NSL1, BUB1B, NUP107, NUP43	362	107	12504	12.589869365415398	2.628540535935622E-29	5.2570810718712444E-30	1.292152993947209E-28
GOTERM_CC_FAT	GO:0005730~nucleolus	34	5.3627760252365935	8.593392527310468E-11	LYAR, TCOF1, POLA1, ERI1, MINA, DIMT1, EBNA1BP2, CDCA8, DKC1, GRWD1, AEN, DDX21, TOP2A, GNL3, OXR1, EXOSC8, RRP12, MKI67, EME1, PNO1, FMR1, EXOSC2, NUSAP1, RPF2, DIS3, PLK4, PA2G4, NOP2, NOL10, NOP58, RRS1, UTP20, MYBBP1A, NHP2	362	310	12504	3.7884156121903403	2.2944358191168135E-8	1.5296238720097222E-9	1.1279118750096018E-7
GOTERM_CC_FAT	GO:0005819~spindle	33	5.205047318611988	6.572547506736909E-24	HAUS4, KIF22, KIFC1, HAUS3, CCDC99, HAUS5, PRC1, NEK2, KNTC1, AURKA, AURKB, FAM83D, SAC3D1, INCENP, F630043A04RIK, FBXO5, SKA1, MYC, FAM33A, CDC6, DLGAP5, KIF15, KIF18A, TPX2, CENPF, NUSAP1, BIRC5, CENPE, NUP85, RACGAP1, GM9430, MAD2L1, SPAG5, RPS6KA2	362	109	12504	10.45749911298089	1.754870184298755E-21	1.9498557603319498E-22	8.626691244170575E-21
GOTERM_CC_FAT	GO:0005874~microtubule	31	4.889589905362776	1.1674876296171318E-11	HAUS4, KIF23, KIF22, KIFC1, HAUS3, HAUS5, PRC1, GTSE1, KIF2C, INCENP, KIF4, F630043A04RIK, TUBB5, TUBB6, SKA1, TUBA1B, FAM33A, CKAP2, KIF11, GM5620, KIF5C, KIF15, KIF18A, TPX2, NUSAP1, KIF18B, BIRC5, CENPJ, GM14150, GM3226, MID2, SPAG5, KIF20B, KIF20A	362	240	12504	4.461602209944752	3.11719383638831E-9	2.397841925017019E-10	1.5323675661704783E-8
GOTERM_CC_FAT	GO:0031967~organelle envelope	30	4.73186119873817	9.689415821398956E-4	HCCS, LMNB1, LMNB2, POLA1, NUP93, ANKLE1, CSE1L, PARL, CPOX, GM10259, MNS1, ABCB10, NUP35, KPNB1, GM5529, GM8429, SHMT2, GM10184, SLC25A5, CENPF, NUP85, GM9797, TIMM23, NUPL1, AAAS, TIMM8A1, TMEM48, NRM, IPO5, PCNA, NUP107, HSPD1, TMPO, NUP43, KPNA2	362	540	12504	1.9189686924493554	0.2280479325130611	0.007583826551440076	1.2643245852367868
GOTERM_CC_FAT	GO:0031975~envelope	30	4.73186119873817	0.0010324876947401661	HCCS, LMNB1, LMNB2, POLA1, NUP93, ANKLE1, CSE1L, PARL, CPOX, GM10259, MNS1, ABCB10, NUP35, KPNB1, GM5529, GM8429, SHMT2, GM10184, SLC25A5, CENPF, NUP85, GM9797, TIMM23, NUPL1, AAAS, TIMM8A1, TMEM48, NRM, IPO5, PCNA, NUP107, HSPD1, TMPO, NUP43, KPNA2	362	542	12504	1.9118876271635643	0.241047911168231	0.007849505536895895	1.346724573352065
GOTERM_CC_FAT	GO:0000779~condensed chromosome, centromeric region	28	4.416403785488959	3.6872357661374385E-26	CCDC99, KNTC1, RANGAP1, SPC24, SPC25, INCENP, F630043A04RIK, BUB1, SKA1, ZWILCH, ERCC6L, FAM33A, CENPN, CENPM, SGOL1, NUF2, CENPF, NDC80, CENPE, NUP85, MLF1IP, CENPH, MAD2L1, SPAG5, NSL1, BUB1B, NUP107, NUP43	362	60	12504	16.119337016574587	9.84491949558696E-24	1.4064170707981373E-24	4.8396218462211694E-23
GOTERM_CC_FAT	GO:0000777~condensed chromosome kinetochore	27	4.2586750788643535	1.7846430113684435E-26	CCDC99, KNTC1, RANGAP1, SPC24, SPC25, INCENP, F630043A04RIK, BUB1, SKA1, ZWILCH, ERCC6L, FAM33A, CENPN, CENPM, NUF2, CENPF, NDC80, CENPE, NUP85, MLF1IP, CENPH, MAD2L1, SPAG5, NSL1, BUB1B, NUP107, NUP43	362	53	12504	17.59658084019598	4.764996840353744E-24	7.9416614005895735E-25	2.3424044062613153E-23
GOTERM_CC_FAT	GO:0000776~kinetochore	27	4.2586750788643535	3.0083728343164383E-24	CCDC99, KNTC1, RANGAP1, SPC24, SPC25, INCENP, F630043A04RIK, BUB1, SKA1, ZWILCH, ERCC6L, FAM33A, CENPN, CENPM, NUF2, CENPF, NDC80, CENPE, NUP85, MLF1IP, CENPH, MAD2L1, SPAG5, NSL1, BUB1B, NUP107, NUP43	362	62	12504	15.04223846016753	8.03235546762489E-22	1.0040444334531113E-22	3.948591252082535E-21
GOTERM_CC_FAT	GO:0012505~endomembrane system	26	4.100946372239748	0.01233573748828155	LMNB1, LMNB2, POLA1, NUP93, ANKLE1, CSE1L, 6530401D17RIK, GM10259, MNS1, NUP35, KPNB1, GM10184, CENPF, NUP85, CFTR, NUPL1, 2900062L11RIK, TMEM48, AAAS, NRM, CHST7, IPO5, SPCS3, PCNA, NUP107, TMPO, EDA, KPNA2, NUP43	362	535	12504	1.6786492487220528	0.963634155631393	0.0741774386212517	15.033885911453137
GOTERM_CC_FAT	GO:0005635~nuclear envelope	21	3.3123028391167195	1.597716879661487E-8	LMNB1, LMNB2, GM10184, POLA1, NUP93, CENPF, NUP85, ANKLE1, NUPL1, AAAS, TMEM48, NRM, CSE1L, IPO5, PCNA, GM10259, MNS1, NUP107, TMPO, NUP35, NUP43, KPNB1, KPNA2	362	153	12504	4.740981475463113	4.26589500746033E-6	2.509355041535599E-7	2.0970573255674196E-5
GOTERM_CC_FAT	GO:0005815~microtubule organizing center	20	3.1545741324921135	2.2918700018740244E-6	HAUS4, HAUS3, KIFC1, HAUS5, DLGAP5, CENPF, BIRC5, AURKA, CEP55, TACC3, ANKRD32, CENPJ, BRCA1, CCNB1, SASS6, PLK4, MAD2L1, SAC3D1, NME1, GM5593, RANBP1	362	189	12504	3.655178461808296	6.11742800764481E-4	2.1854403751131457E-5	0.0030081152158301094
GOTERM_CC_FAT	GO:0030529~ribonucleoprotein complex	20	3.1545741324921135	0.07692380863737071	SNRPA1, MRPS28, GM10184, SNRPD1, SNORA68, TTF2, BRCA1, GM14277, PA2G4, SNORA70, DKC1, RPS6KA2, GM10259, NOP58, THOC4, GM7879, SNRPF, UTP20, GEMIN6, GM11585, NHP2, KPNA2, GM12571, HNRNPAB	362	462	12504	1.4953002798306665	0.9999999994770915	0.30821226638182786	65.02714708986893
GOTERM_CC_FAT	GO:0000228~nuclear chromosome	19	2.996845425867508	1.0796886324649505E-8	NEK2, SGOL1, SUV39H1, TIPIN, POLA1, TOPBP1, POLA2, MCM2, NCAPD3, RAD51, CITED2, PRIM1, RPA1, RPA2, BAZ1A, INCENP, PRIM2, BUB1, RAD18	362	121	12504	5.423861924113054	2.8827644955597975E-6	1.801730243888855E-7	1.4171278051033909E-5
GOTERM_CC_FAT	GO:0005813~centrosome	19	2.996845425867508	8.275139287738849E-7	HAUS4, HAUS3, KIFC1, HAUS5, DLGAP5, CENPF, AURKA, BIRC5, CEP55, TACC3, ANKRD32, CENPJ, BRCA1, CCNB1, SASS6, PLK4, SAC3D1, NME1, GM5593, RANBP1	362	160	12504	4.1017955801104975	2.2092190357592134E-4	9.606315181431846E-6	0.0010861346140922379
GOTERM_CC_FAT	GO:0044454~nuclear chromosome part	16	2.5236593059936907	2.45153711279849E-7	SGOL1, SUV39H1, TIPIN, POLA1, POLA2, MCM2, NCAPD3, CITED2, RAD51, PRIM1, RPA1, RPA2, INCENP, PRIM2, BUB1, RAD18	362	103	12504	5.36566003325645	6.545390674839169E-5	3.2727970917800775E-6	3.217720723314166E-4
GOTERM_CC_FAT	GO:0005657~replication fork	12	1.8927444794952681	1.7808225628984723E-11	RFC5, RPA1, PRIM1, RPA2, RFC4, BLM, PRIM2, PCNA, POLA1, DNMT1, CHEK1, POLA2	362	24	12504	17.2707182320442	4.75478922901118E-9	3.396277703515693E-10	2.3373869506571054E-8
GOTERM_CC_FAT	GO:0005643~nuclear pore	12	1.8927444794952681	8.059741054039785E-7	GM10184, NUP93, NUP85, NUPL1, AAAS, TMEM48, CSE1L, IPO5, GM10259, NUP107, NUP35, KPNA2, NUP43, KPNB1	362	59	12504	7.025376907950182	2.1517202005716385E-4	9.781550927456806E-6	0.001057863146258775
GOTERM_CC_FAT	GO:0046930~pore complex	12	1.8927444794952681	7.138188146350134E-6	GM10184, NUP93, NUP85, NUPL1, AAAS, TMEM48, CSE1L, IPO5, GM10259, NUP107, NUP35, KPNA2, NUP43, KPNB1	362	73	12504	5.678044350261106	0.0019040879575418224	6.352808325349457E-5	0.009368708292956107
GOTERM_CC_FAT	GO:0000785~chromatin	12	1.8927444794952681	0.00839339343700318	KIF22, OIP5, INCENP, SUV39H1, POLA1, TIPIN, DNMT1, RAD18, TMPO, ASF1B, HELLS, CITED2	362	165	12504	2.5121044701155197	0.8946528251741187	0.05217291147262104	10.47310198261513
GOTERM_CC_FAT	GO:0005876~spindle microtubule	8	1.2618296529968454	2.390906849380201E-7	FAM33A, SPAG5, F630043A04RIK, TPX2, KIF18A, NUSAP1, BIRC5, SKA1	362	17	12504	16.254793630159245	6.383518295227653E-5	3.3598480664309704E-6	3.138141681402473E-4
GOTERM_CC_FAT	GO:0000794~condensed nuclear chromosome	8	1.2618296529968454	1.779754503158124E-4	RPA1, NEK2, INCENP, SGOL1, BUB1, TOPBP1, NCAPD3, RAD51	362	42	12504	6.579321231254933	0.046412102740148176	0.0014840125871793397	0.23334691906068405
GOTERM_CC_FAT	GO:0005875~microtubule associated complex	7	1.1041009463722398	0.02233236584594388	HAUS4, HAUS3, KIFC1, CDCA8, HAUS5, KIF5C, BIRC5	362	76	12504	3.1814480953765627	0.9975953019295064	0.11806056601624904	25.65415934844961
GOTERM_CC_FAT	GO:0000940~outer kinetochore of condensed chromosome	6	0.9463722397476341	1.017346020719207E-6	FAM33A, CCDC99, F630043A04RIK, BUB1B, CENPF, SKA1	362	8	12504	25.906077348066297	2.7159463721171395E-4	1.1317916190023425E-5	0.0013352928784238216
GOTERM_CC_FAT	GO:0030894~replisome	6	0.9463722397476341	2.2348006060291905E-6	RPA1, PRIM1, RPA2, PRIM2, POLA1, POLA2	362	9	12504	23.027624309392262	5.965144430262193E-4	2.2099475378900557E-5	0.002933211756206422
GOTERM_CC_FAT	GO:0043601~nuclear replisome	6	0.9463722397476341	2.2348006060291905E-6	RPA1, PRIM1, RPA2, PRIM2, POLA1, POLA2	362	9	12504	23.027624309392262	5.965144430262193E-4	2.2099475378900557E-5	0.002933211756206422
GOTERM_CC_FAT	GO:0043596~nuclear replication fork	6	0.9463722397476341	4.363782293195976E-6	RPA1, PRIM1, RPA2, PRIM2, POLA1, POLA2	362	10	12504	20.724861878453037	0.0011644539112428687	4.017617272533691E-5	0.005727460552396035
GOTERM_CC_FAT	GO:0034399~nuclear periphery	6	0.9463722397476341	0.013141279794251282	LMNB1, NRM, LMNB2, PCNA, POLA1, CENPF	362	49	12504	4.229563648663885	0.9707530575160305	0.0771349638648764	15.938970162368882
GOTERM_CC_FAT	GO:0032993~protein-DNA complex	6	0.9463722397476341	0.06538937894669235	RPA1, PRIM1, RPA2, PRIM2, POLA1, POLA2	362	75	12504	2.763314917127072	0.9999999855987519	0.2715024886747617	58.835945202471486
GOTERM_CC_FAT	GO:0045121~membrane raft	6	0.9463722397476341	0.09911053817983909	SORBS1, NRM, EFNB1, SDPR, TUBB5, KIF18A	362	85	12504	2.438219044523887	0.9999999999992106	0.37645276011310624	74.58745435830336
GOTERM_CC_FAT	GO:0005732~small nucleolar ribonucleoprotein complex	5	0.7886435331230284	9.441407420380505E-4	SNORA70, NOP58, SNORA68, UTP20, NHP2	362	16	12504	10.794198895027625	0.2229143128424783	0.007613435164142368	1.2321481899182252
GOTERM_CC_FAT	GO:0045120~pronucleus	5	0.7886435331230284	0.0015165234986801697	BLM, EZH2, CENPF, CCNA2, NCAPD2	362	18	12504	9.594843462246777	0.33316931710355346	0.010892114576738887	1.9722900824152512
GOTERM_CC_FAT	GO:0000922~spindle pole	5	0.7886435331230284	0.003916486398945882	CCDC99, MAD2L1, NEK2, DLGAP5, CENPF	362	23	12504	7.509007926975738	0.6492757474275577	0.027195847522748617	5.020218009184041
GOTERM_CC_FAT	GO:0005901~caveola	5	0.7886435331230284	0.00808661850666896	SORBS1, NRM, SDPR, TUBB5, KIF18A	362	28	12504	6.168113654301499	0.8855828743557477	0.052755099701205954	10.108885787287337
GOTERM_CC_FAT	GO:0031965~nuclear membrane	5	0.7886435331230284	0.02328891779644161	LMNB1, NRM, LMNB2, PCNA, NUP85	362	38	12504	4.544925850537947	0.9981483759012559	0.12050014553710453	26.60325528254659
GOTERM_CC_FAT	GO:0000792~heterochromatin	5	0.7886435331230284	0.05910547335035991	INCENP, SUV39H1, DNMT1, RAD18, HELLS	362	51	12504	3.38641533961651	0.9999999138150251	0.25209404336339136	55.051427562196245
GOTERM_CC_FAT	GO:0005658~alpha DNA polymerase:primase complex	4	0.6309148264984227	9.343119876427764E-5	PRIM1, PRIM2, POLA1, POLA2	362	4	12504	34.5414364640884	0.024638683411467688	8.044277426428881E-4	0.12256217361947819
GOTERM_CC_FAT	GO:0031262~Ndc80 complex	4	0.6309148264984227	9.343119876427764E-5	SPC24, SPC25, NUF2, NDC80	362	4	12504	34.5414364640884	0.024638683411467688	8.044277426428881E-4	0.12256217361947819
GOTERM_CC_FAT	GO:0005652~nuclear lamina	4	0.6309148264984227	0.0011995986819130814	LMNB1, NRM, LMNB2, PCNA	362	8	12504	17.2707182320442	0.27420314204159046	0.008862855540512582	1.5631136154432346
GOTERM_CC_FAT	GO:0030496~midbody	4	0.6309148264984227	0.004324189430267382	NEK2, INCENP, BIRC5, AURKB	362	12	12504	11.513812154696133	0.6855914620654577	0.0292324755161244	5.52921179490049
GOTERM_CC_FAT	GO:0005637~nuclear inner membrane	4	0.6309148264984227	0.008387158089700218	LMNB1, NRM, LMNB2, PCNA	362	15	12504	9.211049723756906	0.8944758066764162	0.053372061262291326	10.465712707250386
GOTERM_CC_FAT	GO:0001673~male germ cell nucleus	4	0.6309148264984227	0.014110491585688313	RPA1, BLM, TOPBP1, TRIP13	362	18	12504	7.675874769797421	0.9775021295553707	0.08086157945555827	17.016141413091436
GOTERM_CC_FAT	GO:0043073~germ cell nucleus	4	0.6309148264984227	0.024466502630631208	RPA1, BLM, TOPBP1, TRIP13	362	22	12504	6.280261175288799	0.9986582740679083	0.12390081511038842	27.75628768179672
GOTERM_CC_FAT	GO:0015030~Cajal body	4	0.6309148264984227	0.0458811245103852	DKC1, OIP5, GEMIN6, NHP2	362	28	12504	4.934490923441199	0.9999964201551627	0.20723287288553305	46.01467243251993
GOTERM_CC_FAT	GO:0005721~centromeric heterochromatin	3	0.47318611987381703	0.015856069047607523	INCENP, DNMT1, HELLS	362	7	12504	14.803472770323598	0.9859831260924085	0.08859835529817461	18.924055300831544
GOTERM_CC_FAT	GO:0070652~HAUS complex	3	0.47318611987381703	0.02074155916997994	HAUS4, HAUS3, HAUS5	362	8	12504	12.953038674033149	0.9962881926755659	0.11225333066304644	24.050610034582476
GOTERM_CC_FAT	GO:0031080~Nup107-160 complex	3	0.47318611987381703	0.02074155916997994	NUP85, NUP107, NUP43	362	8	12504	12.953038674033149	0.9962881926755659	0.11225333066304644	24.050610034582476
GOTERM_CC_FAT	GO:0000307~cyclin-dependent protein kinase holoenzyme complex	3	0.47318611987381703	0.026164569376819224	CCNE1, PCNA, CDK2	362	9	12504	11.513812154696131	0.9991573494251809	0.12960060827255826	29.38951051945853
GOTERM_CC_FAT	GO:0016600~flotillin complex	3	0.47318611987381703	0.03209016828587853	SORBS1, NRM, TUBB5	362	10	12504	10.362430939226519	0.9998348347618208	0.15420002824627632	34.825413982591314
GOTERM_CC_FAT	GO:0000178~exosome (RNase complex)	3	0.47318611987381703	0.04531714269870737	DIS3, EXOSC8, EXOSC2	362	12	12504	8.6353591160221	0.999995808338766	0.208345675979134	45.594327460109504
GOTERM_CC_FAT	GO:0032133~chromosome passenger complex	2	0.31545741324921134	0.05691024429231041	CDCA8, BIRC5	362	2	12504	34.5414364640884	0.9999998394322557	0.24756928660931288	53.655322525016636

## Sheet: BP-FAT-Up-in spheres
Category	Term	Count	%	PValue	Genes	List Total	Pop Hits	Pop Total	Fold Enrichment	Bonferroni	Benjamini	FDR
GOTERM_BP_FAT	GO:0006508~proteolysis	45	7.165605095541401	0.018072051152161206	CPM, CTSA, MMP28, MYLIP, MMP3, RNF182, CRADD, ERLEC1, USP18, CASP4, ISG15, TPP1, FBXO44, MMP1A, FBXL16, PRSS35, MMP1B, DPP7, PLAT, AGBL3, CAPN5, SOCS2, FBXO2, MMP19, SOCS6, UBE2L6, MARCH9, MCPT8, MMP13, FURIN, QPCT, ADAMTS7, MMP10, CTSL, CBLB, CTSD, FBXO32, ASB3, CTSB, PGCP, CTSH, PMEPA1, FBXL2, ADAMTS4, CTSF	420	1034	13588	1.4079856313898866	0.9999999999999994	0.3824008152590197	26.81904643940993
GOTERM_BP_FAT	GO:0006955~immune response	31	4.936305732484077	1.4082167872709323E-4	CPLX2, ENPP1, ENPP2, H2-D1, CX3CL1, TGFB1, FTH1, B2M, TMEM173, MLL5, TNFRSF1B, PROCR, TAP2, OASL2, BCL6, H2-K1, LY96, H2-GS10, COLEC12, TNFSF9, H2-Q8, CD180, TRAF3IP2, CBLB, IRF7, VEGFA, H2-T23, OAS1A, H2-DMA, OAS1G, CD14	420	471	13588	2.12934991406329	0.23788982475701892	0.044267634759740604	0.24082224146506626
GOTERM_BP_FAT	GO:0043067~regulation of programmed cell death	31	4.936305732484077	0.0023631806196451077	FGFR1, FGF8, HSPA1A, PPT1, HSPA1B, CX3CL1, SOX9, ITM2B, TGFB1, CRADD, SERINC3, CASP4, SHISA5, BCL6, SKIL, FGF2, BMF, DEDD2, SPP1, COL18A1, CLN3, NR4A2, NR4A1, BIRC3, BCL2L11, AMIGO2, CDKN1A, NUPR1, BTG1, VEGFA, ERN1, SYNGAP1	420	560	13588	1.7909353741496599	0.9895793960624234	0.15552144474335428	3.969759893125757
GOTERM_BP_FAT	GO:0007155~cell adhesion	31	4.936305732484077	0.002460748274450072	IGFBP7, EDIL3, NEO1, CX3CL1, SOX9, ALCAM, CD9, LGALS3BP, RGMB, ARHGAP6, COL7A1, ITGB8, MSLN, PKD1, GPNMB, FNDC3A, THBS3, DPT, SPP1, COL18A1, F11R, HAPLN4, TMEM8, PCDH19, BCL2L11, CDH13, AMIGO2, SNED1, ITGA7, VCAN, ROM1	420	561	13588	1.7877429759782701	0.991371057678371	0.1561131901990579	4.130424071162286
GOTERM_BP_FAT	GO:0022610~biological adhesion	31	4.936305732484077	0.0024766543868466216	IGFBP7, EDIL3, NEO1, CX3CL1, SOX9, ALCAM, CD9, LGALS3BP, RGMB, ARHGAP6, COL7A1, ITGB8, MSLN, PKD1, GPNMB, FNDC3A, THBS3, DPT, SPP1, COL18A1, F11R, HAPLN4, TMEM8, PCDH19, BCL2L11, CDH13, AMIGO2, SNED1, ITGA7, VCAN, ROM1	420	562	13588	1.7845619386544653	0.9916324333945448	0.15205928518595502	4.15659258167328
GOTERM_BP_FAT	GO:0010941~regulation of cell death	31	4.936305732484077	0.0025709823839522032	FGFR1, FGF8, HSPA1A, PPT1, HSPA1B, CX3CL1, SOX9, ITM2B, TGFB1, CRADD, SERINC3, CASP4, SHISA5, BCL6, SKIL, FGF2, BMF, DEDD2, SPP1, COL18A1, CLN3, NR4A2, NR4A1, BIRC3, BCL2L11, AMIGO2, CDKN1A, NUPR1, BTG1, VEGFA, ERN1, SYNGAP1	420	563	13588	1.7813922016408694	0.9930277079563001	0.13970431513434978	4.311641507622655
GOTERM_BP_FAT	GO:0016265~death	30	4.777070063694268	0.0014977114593618566	1810011O10RIK, MEF2A, FGF8, YPEL3, PPT1, GLI2, ITM2B, CRADD, TGFB1, MAP3K5, TNFRSF1B, TMEM173, CASP4, SHISA5, DAP, XAF1, FGF2, BMF, DEDD2, NR4A2, BIRC3, NTN1, BCL2L11, DNASE2A, DDIT4, TRAF3IP2, RASSF5, SH3KBP1, ERN1, DRAM1	420	519	13588	1.8700798238370493	0.9444932739734406	0.15639726869106707	2.533455271144369
GOTERM_BP_FAT	GO:0042127~regulation of cell proliferation	30	4.777070063694268	0.002533649280147555	SAT1, WNT5A, FGFR1, FGF8, PTGS2, PTGS1, GLI2, SOX9, TGFB1, FTH1, CD9, OSR2, PTGES, BCL6, FGF2, DPT, COL18A1, CEBPA, NTN1, CBLB, CDKN1A, NUPR1, BTG1, GRN, ZMIZ1, VEGFA, HBEGF, TGFBR3, TGIF1, KLF4	420	538	13588	1.8040361125862983	0.9925056916266688	0.14602933271834728	4.250304555405426
GOTERM_BP_FAT	GO:0008219~cell death	29	4.617834394904459	0.002119578294832277	1810011O10RIK, MEF2A, FGF8, YPEL3, PPT1, GLI2, ITM2B, CRADD, TGFB1, MAP3K5, TNFRSF1B, TMEM173, CASP4, SHISA5, DAP, XAF1, FGF2, BMF, DEDD2, BIRC3, NTN1, BCL2L11, DNASE2A, DDIT4, TRAF3IP2, RASSF5, SH3KBP1, ERN1, DRAM1	420	507	13588	1.8505306659152814	0.9833110054841413	0.16302139754042932	3.5675137318129213
GOTERM_BP_FAT	GO:0042981~regulation of apoptosis	29	4.617834394904459	0.007007988005468082	FGFR1, FGF8, HSPA1A, PPT1, HSPA1B, CX3CL1, SOX9, ITM2B, TGFB1, CRADD, SERINC3, CASP4, SHISA5, BCL6, SKIL, BMF, DEDD2, SPP1, COL18A1, CLN3, NR4A2, NR4A1, BIRC3, BCL2L11, CDKN1A, NUPR1, BTG1, VEGFA, ERN1, SYNGAP1	420	553	13588	1.6965986394557824	0.9999987166025786	0.23762749818420104	11.343746830272883
GOTERM_BP_FAT	GO:0055114~oxidation reduction	29	4.617834394904459	0.06445757048675238	TM7SF2, CYP2U1, PAM, PTGS2, CYP2F2, HSD3B7, PTGS1, IL4I1, FTH1, PLOD2, IDH1, SMOX, KDM3A, NQO1, GFOD1, KDM5B, HSD17B7, SCD1, CYP4V3, GMPR, SOD3, AKR1B8, RDH10, AKR1B3, AKR1B10, AOX1, JMJD1C, LEPREL1, CP	420	672	13588	1.3961592970521544	1.0	0.6604242086963629	68.04134833944157
GOTERM_BP_FAT	GO:0006915~apoptosis	27	4.2993630573248405	0.002554761251519493	1810011O10RIK, MEF2A, FGF8, YPEL3, PPT1, GLI2, ITM2B, CRADD, MAP3K5, TMEM173, CASP4, SHISA5, XAF1, DAP, FGF2, BMF, DEDD2, BIRC3, NTN1, BCL2L11, DNASE2A, DDIT4, TRAF3IP2, RASSF5, SH3KBP1, ERN1, DRAM1	420	465	13588	1.8785253456221196	0.9928055134259063	0.14290049565606355	4.284995314788009
GOTERM_BP_FAT	GO:0012501~programmed cell death	27	4.2993630573248405	0.0032358217566362067	1810011O10RIK, MEF2A, FGF8, YPEL3, PPT1, GLI2, ITM2B, CRADD, MAP3K5, TMEM173, CASP4, SHISA5, XAF1, DAP, FGF2, BMF, DEDD2, BIRC3, NTN1, BCL2L11, DNASE2A, DDIT4, TRAF3IP2, RASSF5, SH3KBP1, ERN1, DRAM1	420	473	13588	1.8467532467532466	0.998073443073405	0.15942344340705183	5.397772148200919
GOTERM_BP_FAT	GO:0042592~homeostatic process	25	3.9808917197452227	0.09102263533166971	BBS4, PPT1, HSPA1A, HSPA1B, TENC1, TGFB1, FTH1, DMPK, MTM1, CD9, MLL5, TPP1, BCL6, SKIL, PPP3CA, GM12892, CLN3, STIM2, SOCS6, BCL2L11, DNASE2A, NPC2, VEGFA, GAA, TGFBR3, CHRNB1	420	584	13588	1.384947814742335	1.0	0.7315147108948561	80.4834942173789
GOTERM_BP_FAT	GO:0035295~tube development	21	3.343949044585987	2.0280573103186893E-4	CEBPA, WNT5A, BBS4, FGFR1, FGF8, CLCN2, MGP, GREM1, GLI2, TGFB1, BCL2L11, SEMA5A, RDH10, HOXA5, VEGFA, PDGFRA, TGIF1, TCTN1, HS6ST1, AREG, FGF2	420	264	13588	2.5734848484848487	0.32379022333511176	0.034943236723007476	0.3466493557906958
GOTERM_BP_FAT	GO:0043009~chordate embryonic development	20	3.1847133757961785	0.06291201416088865	CEBPA, BBS4, FGFR1, FGF8, SIX4, GLI2, BCL2L11, RDH10, OSR2, HOXA5, GRN, ZMIZ1, PDGFRA, TGIF1, HBEGF, TGFBR3, PKD1, TCTN1, HS6ST1, SKIL	420	421	13588	1.5369302115145345	1.0	0.6605881398603661	67.12529143802392
GOTERM_BP_FAT	GO:0009792~embryonic development ending in birth or egg hatching	20	3.1847133757961785	0.0675520012853109	CEBPA, BBS4, FGFR1, FGF8, SIX4, GLI2, BCL2L11, RDH10, OSR2, HOXA5, GRN, ZMIZ1, PDGFRA, TGIF1, HBEGF, TGFBR3, PKD1, TCTN1, HS6ST1, SKIL	420	425	13588	1.5224649859943975	1.0	0.666093282292024	69.80367326685783
GOTERM_BP_FAT	GO:0060429~epithelium development	19	3.0254777070063694	0.0018891836377116417	COL18A1, WNT5A, BBS4, F11R, FGF8, PTGS2, PTGS1, SOX9, GLI2, GREM1, TGFB1, RDH10, HOXA5, VEGFA, CAR9, TGIF1, TCTN1, AREG, FGF2	420	271	13588	2.268248111052539	0.9739485511303279	0.159450250722722	3.1856172685903683
GOTERM_BP_FAT	GO:0001501~skeletal system development	19	3.0254777070063694	0.0032568808694610728	WNT5A, FGFR1, PTGS2, MGP, SIX4, SOX9, GLI2, MMP13, TGFB1, RDH10, OSR2, GLA, HOXA5, PDGFRA, PKD1, GPNMB, CHRD, SPP1, IGFBP5	420	285	13588	2.156825396825397	0.9981503820595179	0.15639848279338397	5.431985452318521
GOTERM_BP_FAT	GO:0006928~cell motion	19	3.0254777070063694	0.0357838372832525	PLAT, CCK, VAV3, NR4A2, CX3CL1, SIX4, GLI2, NTN1, TGFB1, ALCAM, SEMA5A, CD9, TNS1, NAV1, VEGFA, HBEGF, ETV1, LRP5, NR2F1	420	367	13588	1.6749189048916568	1.0	0.5460650625643042	46.41345673809391
GOTERM_BP_FAT	GO:0001568~blood vessel development	18	2.8662420382165608	0.0015063473820095966	COL18A1, FGFR1, FGF8, MMP19, CX3CL1, PNPLA6, SEMA5A, ARHGAP22, ZMIZ1, VEGFA, ITGA7, HBEGF, TGFBR3, PKD1, HS6ST1, FGF2, TNFAIP2, C1GALT1	420	244	13588	2.3866510538641688	0.9454116522501893	0.14917765714907816	2.547886553844436
GOTERM_BP_FAT	GO:0001944~vasculature development	18	2.8662420382165608	0.0019582735111033623	COL18A1, FGFR1, FGF8, MMP19, CX3CL1, PNPLA6, SEMA5A, ARHGAP22, ZMIZ1, VEGFA, ITGA7, HBEGF, TGFBR3, PKD1, HS6ST1, FGF2, TNFAIP2, C1GALT1	420	250	13588	2.3293714285714286	0.9772049788441834	0.15791416187511131	3.300288158458198
GOTERM_BP_FAT	GO:0016044~membrane organization	18	2.8662420382165608	0.00464079458979332	ABCA7, CLN3, ARC, VAV3, A4GALT, MRC2, PPT1, COLEC12, CD9, LRP1, LRP11, RIN2, SH3KBP1, AGRN, MERTK, DNM1, LRP5, EPN2	420	272	13588	2.140966386554622	0.9998732038231021	0.18833921856202296	7.654970471143252
GOTERM_BP_FAT	GO:0008285~negative regulation of cell proliferation	17	2.7070063694267517	0.0015949417465125867	CEBPA, WNT5A, PTGS2, FTH1, TGFB1, CD9, CBLB, CDKN1A, NUPR1, PTGES, BTG1, TGFBR3, TGIF1, BCL6, FGF2, KLF4, DPT	420	224	13588	2.4553146258503404	0.9539993049976042	0.14960797522532288	2.695818319993193
GOTERM_BP_FAT	GO:0048729~tissue morphogenesis	17	2.7070063694267517	0.0029461897428772013	WNT5A, BBS4, FGF8, SOX9, GLI2, GREM1, TGFB1, RDH10, FOXQ1, HOXA5, CAR9, TGIF1, TGFBR3, TCTN1, AREG, CHRD, KLF4	420	238	13588	2.3108843537414967	0.9966257708700282	0.15413851190105043	4.926042765227113
GOTERM_BP_FAT	GO:0007167~enzyme linked receptor protein signaling pathway	17	2.7070063694267517	0.010697863646291394	PLAT, FGFR1, FGF8, TGFB1, EPHB6, RGMB, VEGFA, PDGFRA, GFRA1, HBEGF, TGFBR3, AGRN, SKIL, SYNGAP1, INSR, FGF2, NR1H3	420	273	13588	2.0146171289028434	0.9999999990238004	0.30510093087434154	16.818147485396608
GOTERM_BP_FAT	GO:0030030~cell projection organization	17	2.7070063694267517	0.03889688686723386	BBS4, FGFR1, MTSS1, CCK, VAV3, NR4A2, LPAR1, NRN1, GLI2, NTN1, ALCAM, SEMA5A, BBS2, TSGA10, ETV1, TCTN1, SYNGAP1	420	319	13588	1.7241080758322138	1.0	0.564757283638206	49.29963075552711
GOTERM_BP_FAT	GO:0048514~blood vessel morphogenesis	16	2.547770700636943	0.0012351958717170164	COL18A1, FGFR1, FGF8, MMP19, CX3CL1, PNPLA6, SEMA5A, ARHGAP22, ZMIZ1, VEGFA, ITGA7, HBEGF, HS6ST1, TNFAIP2, FGF2, C1GALT1	420	198	13588	2.6143338143338144	0.9078341489052618	0.14695619011725947	2.0938102750804544
GOTERM_BP_FAT	GO:0048732~gland development	15	2.388535031847134	0.0032019639775409826	WNT5A, PLAG1, FGFR1, FGF8, CLCN2, SOCS2, SOX9, GLI2, NTN1, TGFB1, BCL2L11, HOXA5, VEGFA, AREG, FGF2	420	197	13588	2.463379260333575	0.9979429827433234	0.1620166887618376	5.342741290768571
GOTERM_BP_FAT	GO:0051056~regulation of small GTPase mediated signal transduction	15	2.388535031847134	0.01124338942296109	ARHGEF3, VAV3, ARHGEF6, ARHGEF19, SIPA1L2, RABGAP1L, LPAR1, RALGDS, RALGAPA2, GRTP1, BCL6, RAPGEF3, AGAP1, FGD6, IQSEC2	420	228	13588	2.12844611528822	0.9999999996631374	0.3047768691030218	17.599965480677405
GOTERM_BP_FAT	GO:0040008~regulation of growth	15	2.388535031847134	0.02764891191865827	FGFR1, SOCS2, IGFBP7, ATRN, ADIPOR2, SOCS6, PPT1, NPY1R, NTN1, BCL2L11, TGFB1, BBS2, CREG1, AGRN, IGFBP5	420	256	13588	1.8956473214285712	1.0	0.5001312259611688	38.123780292305284
GOTERM_BP_FAT	GO:0003006~reproductive developmental process	15	2.388535031847134	0.0346198177224564	WNT5A, PLAG1, BBS4, FGF8, SOX9, GLI2, BCL2L11, TGFB1, BBS2, RDH10, VEGFA, PDGFRA, AREG, INSR, FNDC3A	420	264	13588	1.8382034632034632	1.0	0.5421469286241936	45.295068344079205
GOTERM_BP_FAT	GO:0008284~positive regulation of cell proliferation	15	2.388535031847134	0.05731269997719794	COL18A1, FGFR1, FGF8, GLI2, NTN1, TGFB1, CDKN1A, OSR2, ZMIZ1, GRN, VEGFA, HBEGF, TGIF1, BCL6, FGF2	420	284	13588	1.7087525150905432	1.0	0.6515199980843421	63.59526235300868
GOTERM_BP_FAT	GO:0000902~cell morphogenesis	15	2.388535031847134	0.09768276937849185	COL18A1, BBS4, CCK, NR4A2, SOX9, NRN1, GLI2, NTN1, TGFB1, SEMA5A, ALCAM, BBS2, ETV1, BCL6, TCTN1	420	309	13588	1.5705039297272305	1.0	0.7428469118607182	82.79233813683793
GOTERM_BP_FAT	GO:0001525~angiogenesis	14	2.229299363057325	2.3578525490830607E-4	COL18A1, FGFR1, FGF8, MMP19, CX3CL1, PNPLA6, SEMA5A, ARHGAP22, VEGFA, HBEGF, HS6ST1, TNFAIP2, FGF2, C1GALT1	420	133	13588	3.4055137844611525	0.3654780423641365	0.037197473396444414	0.4029131308159295
GOTERM_BP_FAT	GO:0035239~tube morphogenesis	14	2.229299363057325	0.0024809581571777805	WNT5A, BBS4, FGF8, GLI2, GREM1, BCL2L11, TGFB1, SEMA5A, RDH10, HOXA5, VEGFA, TGIF1, TCTN1, AREG	420	171	13588	2.6487329434697857	0.9917017843397282	0.14762083823315375	4.16367192739645
GOTERM_BP_FAT	GO:0006897~endocytosis	14	2.229299363057325	0.005562814472246335	ABCA7, CLN3, ARC, MRC2, PPT1, COLEC12, LRP1, LRP11, RIN2, SH3KBP1, MERTK, DNM1, EPN2, LRP5	420	188	13588	2.4092198581560282	0.9999787812774753	0.20463130355703651	9.10860203357281
GOTERM_BP_FAT	GO:0010324~membrane invagination	14	2.229299363057325	0.005562814472246335	ABCA7, CLN3, ARC, MRC2, PPT1, COLEC12, LRP1, LRP11, RIN2, SH3KBP1, MERTK, DNM1, EPN2, LRP5	420	188	13588	2.4092198581560282	0.9999787812774753	0.20463130355703651	9.10860203357281
GOTERM_BP_FAT	GO:0016477~cell migration	14	2.229299363057325	0.03531667926546714	PLAT, VAV3, CCK, NR4A2, SIX4, CX3CL1, NTN1, TGFB1, TNS1, NAV1, VEGFA, HBEGF, LRP5, NR2F1	420	240	13588	1.8872222222222221	1.0	0.5453187411809213	45.96722348241583
GOTERM_BP_FAT	GO:0043069~negative regulation of programmed cell death	14	2.229299363057325	0.03935109559655339	FGFR1, CLN3, FGF8, NR4A2, HSPA1A, PPT1, HSPA1B, CX3CL1, AMIGO2, CDKN1A, CASP4, VEGFA, BCL6, SYNGAP1, SPP1	420	244	13588	1.8562841530054646	1.0	0.5651314884307064	49.708291607324185
GOTERM_BP_FAT	GO:0060548~negative regulation of cell death	14	2.229299363057325	0.04058886732237288	FGFR1, CLN3, FGF8, NR4A2, HSPA1A, PPT1, HSPA1B, CX3CL1, AMIGO2, CDKN1A, CASP4, VEGFA, BCL6, SYNGAP1, SPP1	420	245	13588	1.8487074829931973	1.0	0.5727180268846825	50.806254648721925
GOTERM_BP_FAT	GO:0001701~in utero embryonic development	14	2.229299363057325	0.07049267256852738	CEBPA, FGFR1, GLI2, BCL2L11, RDH10, ZMIZ1, GRN, PDGFRA, HBEGF, TGFBR3, PKD1, TCTN1, HS6ST1, SKIL	420	267	13588	1.6963795255930088	1.0	0.6676772736715472	71.39328661583824
GOTERM_BP_FAT	GO:0030324~lung development	13	2.0700636942675157	1.5795968696233548E-4	WNT5A, CEBPA, FGFR1, FGF8, CLCN2, MGP, GLI2, RDH10, HOXA5, VEGFA, PDGFRA, HS6ST1, FGF2	420	111	13588	3.7890175890175892	0.2626763250578651	0.04259867195009681	0.2700930238657806
GOTERM_BP_FAT	GO:0030323~respiratory tube development	13	2.0700636942675157	1.87277651425993E-4	WNT5A, CEBPA, FGFR1, FGF8, CLCN2, MGP, GLI2, RDH10, HOXA5, VEGFA, PDGFRA, HS6ST1, FGF2	420	113	13588	3.7219553308048887	0.3032247834887367	0.03548437066122401	0.3201477572943645
GOTERM_BP_FAT	GO:0060541~respiratory system development	13	2.0700636942675157	4.4529807244229116E-4	WNT5A, CEBPA, FGFR1, FGF8, CLCN2, MGP, GLI2, RDH10, HOXA5, VEGFA, PDGFRA, HS6ST1, FGF2	420	124	13588	3.3917818740399386	0.5764870935184664	0.06395347655084849	0.7596485061232894
GOTERM_BP_FAT	GO:0002009~morphogenesis of an epithelium	13	2.0700636942675157	0.007395628533009313	WNT5A, BBS4, FGF8, SOX9, GLI2, GREM1, TGFB1, RDH10, HOXA5, TGIF1, CAR9, TCTN1, AREG	420	173	13588	2.431103770988164	0.9999993956924782	0.2447966942126465	11.934419342969482
GOTERM_BP_FAT	GO:0010648~negative regulation of cell communication	13	2.0700636942675157	0.012730199230485212	CLN3, SOCS2, SOCS6, GREM1, DDIT4, CBLB, LRP1, RGS2, TGIF1, BCL6, SKIL, DDIT4L, CHRD	420	186	13588	2.2611879160266257	0.9999999999815176	0.333123758972929	19.695802665507177
GOTERM_BP_FAT	GO:0007169~transmembrane receptor protein tyrosine kinase signaling pathway	13	2.0700636942675157	0.016013993117589952	PLAT, FGFR1, FGF8, EPHB6, VEGFA, PDGFRA, HBEGF, GFRA1, AGRN, SYNGAP1, FGF2, INSR, NR1H3	420	192	13588	2.190525793650794	0.9999999999999701	0.3717337187023788	24.148202899417605
GOTERM_BP_FAT	GO:0040007~growth	13	2.0700636942675157	0.01661834538100917	WNT5A, PLAG1, PTGS2, SOX9, GLI2, TENC1, TGFB1, RDH10, HOXA5, ZMIZ1, HBEGF, TGFBR3, AREG	420	193	13588	2.179175919072292	0.9999999999999909	0.37835397526751113	24.941870046985837
GOTERM_BP_FAT	GO:0043066~negative regulation of apoptosis	13	2.0700636942675157	0.06695748547215169	FGFR1, CLN3, FGF8, NR4A2, PPT1, HSPA1A, HSPA1B, CX3CL1, CDKN1A, CASP4, VEGFA, BCL6, SYNGAP1, SPP1	420	239	13588	1.7597529388324369	1.0	0.6657301176352247	69.47235437097741
GOTERM_BP_FAT	GO:0001763~morphogenesis of a branching structure	12	1.910828025477707	0.0016678248588790998	SEMA5A, WNT5A, FGFR1, RDH10, FGF8, HOXA5, VEGFA, AREG, SOX9, GREM1, GLI2, TGFB1	420	125	13588	3.1058285714285714	0.9600417464505135	0.14870452504256915	2.8173574387241107
GOTERM_BP_FAT	GO:0009100~glycoprotein metabolic process	12	1.910828025477707	0.00583900405967734	ST3GAL1, GNPTG, CLN3, ST6GAL1, MGAT3, GALNT7, MAMDC2, POMT1, FBXO2, HS6ST1, MGAT5, C1GALT1	420	147	13588	2.6410106899902814	0.9999875830866135	0.20970005615965914	9.539823863084695
GOTERM_BP_FAT	GO:0009968~negative regulation of signal transduction	12	1.910828025477707	0.01699962286053466	CBLB, LRP1, SOCS2, RGS2, SOCS6, TGIF1, BCL6, DDIT4L, SKIL, GREM1, CHRD, DDIT4	420	171	13588	2.2703425229741017	0.9999999999999957	0.3723884200774049	25.438553906860783
GOTERM_BP_FAT	GO:0000904~cell morphogenesis involved in differentiation	12	1.910828025477707	0.06431361024183829	COL18A1, ALCAM, SEMA5A, CCK, NR4A2, ETV1, TCTN1, SOX9, GLI2, NRN1, NTN1, TGFB1	420	212	13588	1.8312668463611859	1.0	0.6626707465848937	67.95704859819452
GOTERM_BP_FAT	GO:0031175~neuron projection development	12	1.910828025477707	0.07524321548507895	ALCAM, SEMA5A, FGFR1, BBS4, CCK, NR4A2, ETV1, TCTN1, GLI2, SYNGAP1, NRN1, NTN1	420	218	13588	1.7808650065530798	1.0	0.6839550609007674	73.79588160352554
GOTERM_BP_FAT	GO:0060562~epithelial tube morphogenesis	11	1.7515923566878981	0.0022484472386750326	WNT5A, BBS4, RDH10, FGF8, HOXA5, TGIF1, TCTN1, AREG, GREM1, GLI2, TGFB1	420	111	13588	3.206091806091806	0.9869913152772422	0.1594388072086459	3.7805046473346704
GOTERM_BP_FAT	GO:0046578~regulation of Ras protein signal transduction	11	1.7515923566878981	0.053972655691764626	ARHGEF3, VAV3, ARHGEF6, GRTP1, ARHGEF19, RABGAP1L, BCL6, LPAR1, AGAP1, FGD6, IQSEC2	420	181	13588	1.9661667982109972	1.0	0.639158603967557	61.32273313081464
GOTERM_BP_FAT	GO:0045596~negative regulation of cell differentiation	11	1.7515923566878981	0.05562154940794291	ENPP1, TGFBR3, BCL6, SKIL, SOX9, GLI2, SYNGAP1, CHRD, NTN1, KLF4, TGFB1	420	182	13588	1.9553636839351127	1.0	0.6436043503418674	62.46081663825373
GOTERM_BP_FAT	GO:0048858~cell projection morphogenesis	11	1.7515923566878981	0.09583232756572255	ALCAM, SEMA5A, BBS4, BBS2, CCK, NR4A2, ETV1, TCTN1, GLI2, NRN1, NTN1	420	202	13588	1.7617633191890618	1.0	0.7382055080132173	82.1780789569607
GOTERM_BP_FAT	GO:0019882~antigen processing and presentation	10	1.5923566878980893	0.0014158408295574226	H2-K1, PROCR, TAP2, H2-GS10, H2-D1, H2-T23, H2-DMA, H2-Q8, B2M, TAPBP	420	87	13588	3.7186644772851665	0.9349820718151064	0.15702524184525657	2.396543230499648
GOTERM_BP_FAT	GO:0048754~branching morphogenesis of a tube	10	1.5923566878980893	0.0022587933218697954	SEMA5A, WNT5A, RDH10, FGF8, HOXA5, VEGFA, AREG, GREM1, GLI2, TGFB1	420	93	13588	3.4787506400409627	0.987248938575802	0.15445563887084357	3.797585135986292
GOTERM_BP_FAT	GO:0048589~developmental growth	10	1.5923566878980893	0.0037011673744906724	PLAG1, WNT5A, RDH10, PTGS2, ZMIZ1, HBEGF, AREG, SOX9, GLI2, TGFB1	420	100	13588	3.235238095238095	0.9992173280341968	0.16756908752732802	6.1510774907201915
GOTERM_BP_FAT	GO:0060348~bone development	10	1.5923566878980893	0.010748863224243111	GLA, PTGS2, MGP, GPNMB, SOX9, GLI2, MMP13, CHRD, IGFBP5, SPP1	420	118	13588	2.741727199354318	0.9999999991162074	0.30192418387904574	16.891532221385
GOTERM_BP_FAT	GO:0007548~sex differentiation	10	1.5923566878980893	0.01923949279171701	WNT5A, RDH10, FGF8, VEGFA, PDGFRA, AREG, SOX9, FNDC3A, BCL2L11, TGFB1	420	130	13588	2.4886446886446887	1.0	0.39734725496739265	28.29446989290252
GOTERM_BP_FAT	GO:0009991~response to extracellular stimulus	10	1.5923566878980893	0.021962465797541582	CLN3, MLL5, GSDMD, ARSA, ADIPOR2, NR4A2, MGP, CTSD, CP, KLF4	420	133	13588	2.4325098460436805	1.0	0.4351358308211716	31.627670286102106
GOTERM_BP_FAT	GO:0001655~urogenital system development	10	1.5923566878980893	0.03698745809545903	PLAG1, WNT5A, FGFR1, RDH10, FGF8, SOX9, GREM1, GLI2, TENC1, BCL2L11	420	146	13588	2.215916503587736	1.0	0.5501857904973659	47.547231538761345
GOTERM_BP_FAT	GO:0060284~regulation of cell development	10	1.5923566878980893	0.057867229879567085	SOCS2, BTG1, TGFBR3, TGIF1, AGRN, GLI2, SYNGAP1, FGF2, NTN1, TGFB1	420	159	13588	2.034740940401318	1.0	0.651778485894239	63.96016517859243
GOTERM_BP_FAT	GO:0015674~di-, tri-valent inorganic cation transport	10	1.5923566878980893	0.06163934447632996	ATP2A3, STIM2, CACNB2, SLC25A37, SLC24A6, PKD1, PPP3CA, ITPR3, FTH1, ITPR2	420	161	13588	2.0094646554273883	1.0	0.6560199464910385	66.35247232979266
GOTERM_BP_FAT	GO:0007517~muscle organ development	10	1.5923566878980893	0.09487099248923304	MTSS1, CRYAB, MYL6B, TGFBR3, ETV1, MKX, PPP3CA, AGRN, SIX4, TGFB1	420	176	13588	1.8382034632034632	1.0	0.7393572728094144	81.85086926310888
GOTERM_BP_FAT	GO:0030879~mammary gland development	9	1.4331210191082804	0.004975745107459994	WNT5A, SOCS2, VEGFA, AREG, GLI2, FGF2, NTN1, BCL2L11, TGFB1	420	86	13588	3.3857142857142857	0.9999337563501506	0.19251114116540546	8.185557615411454
GOTERM_BP_FAT	GO:0001503~ossification	9	1.4331210191082804	0.016680837230909337	GLA, PTGS2, MGP, GPNMB, GLI2, MMP13, CHRD, IGFBP5, SPP1	420	106	13588	2.746900269541779	0.9999999999999919	0.3751673628998994	25.023490037671113
GOTERM_BP_FAT	GO:0009101~glycoprotein biosynthetic process	9	1.4331210191082804	0.02827640081928895	ST3GAL1, GNPTG, ST6GAL1, MGAT3, GALNT7, POMT1, HS6ST1, MGAT5, C1GALT1	420	117	13588	2.4886446886446887	1.0	0.5036107807244636	38.80387459030313
GOTERM_BP_FAT	GO:0044092~negative regulation of molecular function	9	1.4331210191082804	0.051690284322581014	CLN3, CDKN1A, ZFP462, GLA, STIM2, NR4A1, HSPA1A, HSPA1B, NQO1, SPRY4	420	132	13588	2.205844155844156	1.0	0.6263452243595782	59.69372121757266
GOTERM_BP_FAT	GO:0016042~lipid catabolic process	9	1.4331210191082804	0.05553979857083029	PLD3, GLA, SMPDL3A, ENPP2, ABHD4, PLA2G7, PPT1, PNPLA6, LIPE	420	134	13588	2.1729211087420044	1.0	0.6464999575181118	62.40514243949089
GOTERM_BP_FAT	GO:0048002~antigen processing and presentation of peptide antigen	8	1.2738853503184715	8.025012979445973E-5	H2-K1, TAP2, H2-D1, H2-T23, H2-DMA, H2-Q8, B2M, TAPBP	420	35	13588	7.39482993197279	0.14342098504279843	0.05029408365657473	0.13730451141591438
GOTERM_BP_FAT	GO:0022612~gland morphogenesis	8	1.2738853503184715	0.014906403878958346	PLAG1, WNT5A, FGFR1, FGF8, AREG, SOX9, GLI2, TGFB1	420	84	13588	3.0811791383219957	0.9999999999997381	0.3552891314455374	22.67310655181354
GOTERM_BP_FAT	GO:0043413~biopolymer glycosylation	8	1.2738853503184715	0.022222567495956178	ST3GAL1, GNPTG, ST6GAL1, MGAT3, GALNT7, POMT1, MGAT5, C1GALT1	420	91	13588	2.844165358451073	1.0	0.43470385106353393	31.938310237501433
GOTERM_BP_FAT	GO:0070085~glycosylation	8	1.2738853503184715	0.022222567495956178	ST3GAL1, GNPTG, ST6GAL1, MGAT3, GALNT7, POMT1, MGAT5, C1GALT1	420	91	13588	2.844165358451073	1.0	0.43470385106353393	31.938310237501433
GOTERM_BP_FAT	GO:0006486~protein amino acid glycosylation	8	1.2738853503184715	0.022222567495956178	ST3GAL1, GNPTG, ST6GAL1, MGAT3, GALNT7, POMT1, MGAT5, C1GALT1	420	91	13588	2.844165358451073	1.0	0.43470385106353393	31.938310237501433
GOTERM_BP_FAT	GO:0035113~embryonic appendage morphogenesis	8	1.2738853503184715	0.030214658667583206	WNT5A, FGFR1, RDH10, FGF8, GREM1, GLI2, MMP13, LRP5	420	97	13588	2.668237604320079	1.0	0.5098506207888208	40.860448763314864
GOTERM_BP_FAT	GO:0030326~embryonic limb morphogenesis	8	1.2738853503184715	0.030214658667583206	WNT5A, FGFR1, RDH10, FGF8, GREM1, GLI2, MMP13, LRP5	420	97	13588	2.668237604320079	1.0	0.5098506207888208	40.860448763314864
GOTERM_BP_FAT	GO:0045137~development of primary sexual characteristics	8	1.2738853503184715	0.041744890041033225	WNT5A, RDH10, FGF8, VEGFA, PDGFRA, SOX9, FNDC3A, BCL2L11	420	104	13588	2.4886446886446887	1.0	0.5793026733989213	51.81128386522671
GOTERM_BP_FAT	GO:0048872~homeostasis of number of cells	8	1.2738853503184715	0.06030727692866634	MLL5, VEGFA, TGFBR3, BCL6, SKIL, BCL2L11, DNASE2A, TGFB1	420	113	13588	2.2904340497260853	1.0	0.6541823319080187	65.52528101528033
GOTERM_BP_FAT	GO:0031667~response to nutrient levels	8	1.2738853503184715	0.06502285312237885	CLN3, MLL5, ARSA, ADIPOR2, MGP, CTSD, CP, KLF4	420	115	13588	2.2506004140786753	1.0	0.6576225672303642	68.37034896116467
GOTERM_BP_FAT	GO:0035107~appendage morphogenesis	8	1.2738853503184715	0.06502285312237885	WNT5A, FGFR1, RDH10, FGF8, GREM1, GLI2, MMP13, LRP5	420	115	13588	2.2506004140786753	1.0	0.6576225672303642	68.37034896116467
GOTERM_BP_FAT	GO:0035108~limb morphogenesis	8	1.2738853503184715	0.06502285312237885	WNT5A, FGFR1, RDH10, FGF8, GREM1, GLI2, MMP13, LRP5	420	115	13588	2.2506004140786753	1.0	0.6576225672303642	68.37034896116467
GOTERM_BP_FAT	GO:0048736~appendage development	8	1.2738853503184715	0.0751062087189316	WNT5A, FGFR1, RDH10, FGF8, GREM1, GLI2, MMP13, LRP5	420	119	13588	2.1749499799919967	1.0	0.6860536564418478	73.72933548906853
GOTERM_BP_FAT	GO:0060173~limb development	8	1.2738853503184715	0.0751062087189316	WNT5A, FGFR1, RDH10, FGF8, GREM1, GLI2, MMP13, LRP5	420	119	13588	2.1749499799919967	1.0	0.6860536564418478	73.72933548906853
GOTERM_BP_FAT	GO:0006816~calcium ion transport	8	1.2738853503184715	0.08047404811152443	ATP2A3, STIM2, CACNB2, SLC24A6, PKD1, PPP3CA, ITPR3, ITPR2	420	121	13588	2.139000393545848	1.0	0.6984426527175083	76.22107292872829
GOTERM_BP_FAT	GO:0032963~collagen metabolic process	7	1.1146496815286624	5.359558605848375E-5	MMP10, MMP19, MMP1A, MMP3, MMP13, MMP1B, TENC1	420	23	13588	9.846376811594203	0.09822357556117656	0.09822357556117656	0.09171943712202868
GOTERM_BP_FAT	GO:0044259~multicellular organismal macromolecule metabolic process	7	1.1146496815286624	6.961461825029021E-5	MMP10, MMP19, MMP1A, MMP3, MMP13, MMP1B, TENC1	420	24	13588	9.436111111111112	0.1256646427518442	0.06494098729109299	0.11911781926902121
GOTERM_BP_FAT	GO:0044236~multicellular organismal metabolic process	7	1.1146496815286624	1.13009413413069E-4	MMP10, MMP19, MMP1A, MMP3, MMP13, MMP1B, TENC1	420	26	13588	8.71025641025641	0.1958805708810586	0.053043261279269505	0.19330319445848287
GOTERM_BP_FAT	GO:0007050~cell cycle arrest	7	1.1146496815286624	0.007981720761554383	CDKN1A, MLL5, ERN1, PKD1, SKIL, SESN1, SESN3	420	57	13588	3.973099415204678	0.9999998066017921	0.2571633611473664	12.820453049483493
GOTERM_BP_FAT	GO:0045444~fat cell differentiation	7	1.1146496815286624	0.01102421679477317	CEBPA, SCD1, BBS4, BBS2, RGS2, BBS9, SDF4	420	61	13588	3.712568306010929	0.9999999994834257	0.3040220628854894	17.286694336843833
GOTERM_BP_FAT	GO:0001666~response to hypoxia	7	1.1146496815286624	0.013787812200325739	PLAT, ATP1B1, VEGFA, NR4A2, MMP13, SOD3, TGFB1	420	64	13588	3.5385416666666663	0.9999999999976621	0.3463002352158281	21.155971977722032
GOTERM_BP_FAT	GO:0070482~response to oxygen levels	7	1.1146496815286624	0.014807485002819108	PLAT, ATP1B1, VEGFA, NR4A2, MMP13, SOD3, TGFB1	420	65	13588	3.4841025641025642	0.9999999999996821	0.3577172019239585	22.54005996199131
GOTERM_BP_FAT	GO:0051216~cartilage development	7	1.1146496815286624	0.03310949388009954	WNT5A, FGFR1, HOXA5, MGP, PKD1, SOX9, MMP13	420	78	13588	2.9034188034188033	1.0	0.5300957781738956	43.81117275808008
GOTERM_BP_FAT	GO:0035023~regulation of Rho protein signal transduction	7	1.1146496815286624	0.0495540986854391	ARHGEF3, VAV3, ARHGEF6, ARHGEF19, BCL6, LPAR1, FGD6	420	86	13588	2.6333333333333333	1.0	0.6211779624103648	58.11070713177485
GOTERM_BP_FAT	GO:0030099~myeloid cell differentiation	7	1.1146496815286624	0.07611301570653906	CEBPA, MLL5, VEGFA, TGFBR3, BCL6, DNASE2A, TGFB1	420	96	13588	2.359027777777778	1.0	0.6855393130183178	74.21466756201497
GOTERM_BP_FAT	GO:0043086~negative regulation of catalytic activity	7	1.1146496815286624	0.0919091987563059	CLN3, CDKN1A, GLA, NR4A1, HSPA1A, HSPA1B, NQO1, SPRY4	420	101	13588	2.2422442244224423	1.0	0.7325929417203498	80.80684052072931
GOTERM_BP_FAT	GO:0030198~extracellular matrix organization	7	1.1146496815286624	0.0919091987563059	COL18A1, SMOC2, SERAC1, POMT1, OLFML2B, PDGFRA, DPT	420	101	13588	2.2422442244224423	1.0	0.7325929417203498	80.80684052072931
GOTERM_BP_FAT	GO:0030574~collagen catabolic process	6	0.9554140127388535	1.2393665258730185E-4	MMP10, MMP19, MMP1A, MMP3, MMP13, MMP1B	420	17	13588	11.418487394957983	0.21265489450882846	0.04669246349602929	0.21197562784929236
GOTERM_BP_FAT	GO:0002474~antigen processing and presentation of peptide antigen via MHC class I	6	0.9554140127388535	1.2393665258730185E-4	H2-K1, H2-D1, H2-T23, H2-Q8, B2M, TAPBP	420	17	13588	11.418487394957983	0.21265489450882846	0.04669246349602929	0.21197562784929236
GOTERM_BP_FAT	GO:0044243~multicellular organismal catabolic process	6	0.9554140127388535	1.6728280100825673E-4	MMP10, MMP19, MMP1A, MMP3, MMP13, MMP1B	420	18	13588	10.784126984126983	0.2758201575547361	0.03522202283007636	0.28601299723399753
GOTERM_BP_FAT	GO:0007033~vacuole organization	6	0.9554140127388535	0.003621886387337103	CLN3, TPP1, GAA, CTSD, PPT1, GBA	420	34	13588	5.709243697478992	0.9990874811767819	0.1682240404445381	6.023137221690655
GOTERM_BP_FAT	GO:0031214~biomineral formation	6	0.9554140127388535	0.004120515985852637	ENPP1, GLA, PTGS2, GPNMB, MMP13, SPP1	420	35	13588	5.546122448979592	0.9996525522871269	0.17656096620616923	6.82508084962008
GOTERM_BP_FAT	GO:0030278~regulation of ossification	6	0.9554140127388535	0.023241733944585112	ANK, ENPP1, MGP, SOX9, CHRD, TGFB1	420	53	13588	3.6625336927223717	1.0	0.4451867294656965	33.142743977523146
GOTERM_BP_FAT	GO:0046546~development of primary male sexual characteristics	6	0.9554140127388535	0.023241733944585112	WNT5A, FGF8, PDGFRA, SOX9, FNDC3A, BCL2L11	420	53	13588	3.6625336927223717	1.0	0.4451867294656965	33.142743977523146
GOTERM_BP_FAT	GO:0002822~regulation of adaptive immune response based on somatic recombination of immune receptors built from immunoglobulin superfamily domains	6	0.9554140127388535	0.028725360285081502	H2-K1, TAP2, BCL6, H2-Q8, TGFB1, B2M	420	56	13588	3.466326530612245	1.0	0.5047948367499726	39.28614618776181
GOTERM_BP_FAT	GO:0002819~regulation of adaptive immune response	6	0.9554140127388535	0.028725360285081502	H2-K1, TAP2, BCL6, H2-Q8, TGFB1, B2M	420	56	13588	3.466326530612245	1.0	0.5047948367499726	39.28614618776181
GOTERM_BP_FAT	GO:0046661~male sex differentiation	6	0.9554140127388535	0.03071994100828035	WNT5A, FGF8, PDGFRA, SOX9, FNDC3A, BCL2L11	420	57	13588	3.4055137844611525	1.0	0.511553108250808	41.38578042394448
GOTERM_BP_FAT	GO:0006665~sphingolipid metabolic process	6	0.9554140127388535	0.04198081449676751	CLN3, SGMS2, GLA, SMPDL3A, ITGB8, GBA	420	62	13588	3.1308755760368663	1.0	0.5775863334334086	52.01400335540113
GOTERM_BP_FAT	GO:0050678~regulation of epithelial cell proliferation	6	0.9554140127388535	0.04449483378593631	WNT5A, GRN, VEGFA, TGFBR3, FGF2, TGFB1	420	63	13588	3.0811791383219953	1.0	0.5917618335615003	54.12490114846384
GOTERM_BP_FAT	GO:0006643~membrane lipid metabolic process	6	0.9554140127388535	0.047097123751240644	CLN3, SGMS2, GLA, SMPDL3A, ITGB8, GBA	420	64	13588	3.033035714285714	1.0	0.6056805279346382	56.21762671227313
GOTERM_BP_FAT	GO:0002706~regulation of lymphocyte mediated immunity	6	0.9554140127388535	0.049787926979679605	H2-K1, TAP2, BCL6, H2-Q8, TGFB1, B2M	420	65	13588	2.9863736263736262	1.0	0.6193311425685852	58.28679590132371
GOTERM_BP_FAT	GO:0002703~regulation of leukocyte mediated immunity	6	0.9554140127388535	0.0645719555659914	H2-K1, TAP2, BCL6, H2-Q8, TGFB1, B2M	420	70	13588	2.773061224489796	1.0	0.6580268916858093	68.10818063082962
GOTERM_BP_FAT	GO:0030031~cell projection assembly	6	0.9554140127388535	0.0645719555659914	BBS4, BBS2, MTSS1, VAV3, TSGA10, LPAR1	420	70	13588	2.773061224489796	1.0	0.6580268916858093	68.10818063082962
GOTERM_BP_FAT	GO:0045926~negative regulation of growth	6	0.9554140127388535	0.06779402290741446	BBS2, SOCS2, ADIPOR2, PPT1, NTN1, TGFB1	420	71	13588	2.734004024144869	1.0	0.6586173463205929	69.93757779851826
GOTERM_BP_FAT	GO:0007584~response to nutrient	6	0.9554140127388535	0.08521132255495958	MLL5, ARSA, ADIPOR2, MGP, CP, KLF4	420	76	13588	2.5541353383458647	1.0	0.7172642159579773	78.23357713085512
GOTERM_BP_FAT	GO:0016331~morphogenesis of embryonic epithelium	6	0.9554140127388535	0.09277692373473873	BBS4, RDH10, FGF8, TGIF1, TCTN1, GLI2	420	78	13588	2.4886446886446882	1.0	0.7335800533262882	81.1184262361545
GOTERM_BP_FAT	GO:0060602~branch elongation of an epithelium	5	0.7961783439490446	1.6147036710836024E-4	WNT5A, RDH10, AREG, SOX9, TGFB1	420	10	13588	16.176190476190474	0.2676534791967877	0.03818935844767868	0.2760880758454154
GOTERM_BP_FAT	GO:0060560~developmental growth involved in morphogenesis	5	0.7961783439490446	0.0012078852766875172	WNT5A, RDH10, AREG, SOX9, TGFB1	420	16	13588	10.110119047619046	0.9028422201651536	0.15340252245204944	2.0479650862802568
GOTERM_BP_FAT	GO:0007040~lysosome organization	5	0.7961783439490446	0.004194305198927561	CLN3, TPP1, GAA, PPT1, GBA	420	22	13588	7.352813852813853	0.9996988282917881	0.17555394887074294	6.943206911634192
GOTERM_BP_FAT	GO:0002478~antigen processing and presentation of exogenous peptide antigen	5	0.7961783439490446	0.004955533578304367	H2-K1, TAP2, H2-DMA, B2M, TAPBP	420	23	13588	7.033126293995859	0.9999311092294079	0.19570984821690152	8.153622567397512
GOTERM_BP_FAT	GO:0019884~antigen processing and presentation of exogenous antigen	5	0.7961783439490446	0.01015280348203828	H2-K1, TAP2, H2-DMA, B2M, TAPBP	420	28	13588	5.7772108843537415	0.9999999971752787	0.2963789068606436	16.030024922228602
GOTERM_BP_FAT	GO:0006914~autophagy	5	0.7961783439490446	0.014514828078506875	CLN3, ARSA, CTSD, TMEM74, DRAM1	420	31	13588	5.218125960061443	0.9999999999994363	0.3564091421191602	22.14517100593255
GOTERM_BP_FAT	GO:0006518~peptide metabolic process	5	0.7961783439490446	0.028797269208563736	PAM, TPP1, IDH1, MGST1, TAPBP	420	38	13588	4.256892230576441	1.0	0.5013595609824869	39.363057346215356
GOTERM_BP_FAT	GO:0030218~erythrocyte differentiation	5	0.7961783439490446	0.05990166703261565	MLL5, VEGFA, TGFBR3, BCL6, DNASE2A	420	48	13588	3.3700396825396823	1.0	0.6548898780980048	65.26962558947436
GOTERM_BP_FAT	GO:0060485~mesenchyme development	5	0.7961783439490446	0.06764290901962489	FGFR1, RDH10, HOXA5, SOX9, TGFB1	420	50	13588	3.235238095238095	1.0	0.6606922989069075	69.85403597107577
GOTERM_BP_FAT	GO:0034101~erythrocyte homeostasis	5	0.7961783439490446	0.07169831748268023	MLL5, VEGFA, TGFBR3, BCL6, DNASE2A	420	51	13588	3.171802054154995	1.0	0.6712695798610575	72.02195263889622
GOTERM_BP_FAT	GO:0001916~positive regulation of T cell mediated cytotoxicity	4	0.6369426751592357	0.0021287486248357176	H2-K1, TAP2, H2-Q8, B2M	420	9	13588	14.37883597883598	0.9836042481283536	0.15741484028223307	3.5826848509260767
GOTERM_BP_FAT	GO:0001914~regulation of T cell mediated cytotoxicity	4	0.6369426751592357	0.003993477799761976	H2-K1, TAP2, H2-Q8, B2M	420	11	13588	11.764502164502165	0.9995556248703041	0.17549414574571764	6.621379885304157
GOTERM_BP_FAT	GO:0002711~positive regulation of T cell mediated immunity	4	0.6369426751592357	0.006611798812305718	H2-K1, TAP2, H2-Q8, B2M	420	13	13588	9.954578754578755	0.9999972295773225	0.22983713902538272	10.736194857735615
GOTERM_BP_FAT	GO:0030282~bone mineralization	4	0.6369426751592357	0.008224743114508985	GLA, PTGS2, GPNMB, MMP13	420	14	13588	9.243537414965987	0.9999998794419419	0.25961683875484165	13.185378178419537
GOTERM_BP_FAT	GO:0048854~brain morphogenesis	4	0.6369426751592357	0.010048841242095072	WNT5A, BBS4, BBS2, FGF8	420	15	13588	8.627301587301588	0.999999996540932	0.2982815540978119	15.878905893852323
GOTERM_BP_FAT	GO:0002709~regulation of T cell mediated immunity	4	0.6369426751592357	0.016832325062209472	H2-K1, TAP2, H2-Q8, B2M	420	18	13588	7.18941798941799	0.999999999999994	0.3736205853091089	25.221000099116942
GOTERM_BP_FAT	GO:0001912~positive regulation of leukocyte mediated cytotoxicity	4	0.6369426751592357	0.032627832057756025	H2-K1, TAP2, H2-Q8, B2M	420	23	13588	5.6265010351966875	1.0	0.5289584725507951	43.3300237962108
GOTERM_BP_FAT	GO:0031343~positive regulation of cell killing	4	0.6369426751592357	0.032627832057756025	H2-K1, TAP2, H2-Q8, B2M	420	23	13588	5.6265010351966875	1.0	0.5289584725507951	43.3300237962108
GOTERM_BP_FAT	GO:0060603~mammary gland duct morphogenesis	4	0.6369426751592357	0.04478125748378266	WNT5A, AREG, GLI2, TGFB1	420	26	13588	4.977289377289377	1.0	0.5904501611971875	54.35976915863324
GOTERM_BP_FAT	GO:0009636~response to toxin	4	0.6369426751592357	0.0588573200218039	HTR1B, NUPR1, CYP2F2, NR4A2	420	29	13588	4.462397372742201	1.0	0.6548461517843522	64.60313493853774
GOTERM_BP_FAT	GO:0001910~regulation of leukocyte mediated cytotoxicity	4	0.6369426751592357	0.06395816258147793	H2-K1, TAP2, H2-Q8, B2M	420	30	13588	4.313650793650794	1.0	0.6636899800711751	67.7480092147784
GOTERM_BP_FAT	GO:0031341~regulation of cell killing	4	0.6369426751592357	0.06395816258147793	H2-K1, TAP2, H2-Q8, B2M	420	30	13588	4.313650793650794	1.0	0.6636899800711751	67.7480092147784
GOTERM_BP_FAT	GO:0050679~positive regulation of epithelial cell proliferation	4	0.6369426751592357	0.0692556627078048	GRN, VEGFA, FGF2, TGFB1	420	31	13588	4.174500768049155	1.0	0.6638247614424077	70.73445696358087
GOTERM_BP_FAT	GO:0060443~mammary gland morphogenesis	4	0.6369426751592357	0.08042008359330963	WNT5A, AREG, GLI2, TGFB1	420	33	13588	3.9215007215007223	1.0	0.7008758266493712	76.19716940214066
GOTERM_BP_FAT	GO:0002824~positive regulation of adaptive immune response based on somatic recombination of immune receptors built from immunoglobulin superfamily domains	4	0.6369426751592357	0.08627616433791022	H2-K1, TAP2, H2-Q8, B2M	420	34	13588	3.806162464985995	1.0	0.7166904544314492	78.6633127720074
GOTERM_BP_FAT	GO:0002821~positive regulation of adaptive immune response	4	0.6369426751592357	0.08627616433791022	H2-K1, TAP2, H2-Q8, B2M	420	34	13588	3.806162464985995	1.0	0.7166904544314492	78.6633127720074
GOTERM_BP_FAT	GO:0051781~positive regulation of cell division	4	0.6369426751592357	0.09850758063844789	FGF8, VEGFA, FGF2, TGFB1	420	36	13588	3.594708994708995	1.0	0.7435562134979987	83.05966354909245
GOTERM_BP_FAT	GO:0006672~ceramide metabolic process	4	0.6369426751592357	0.09850758063844789	CLN3, SGMS2, GLA, ITGB8	420	36	13588	3.594708994708995	1.0	0.7435562134979987	83.05966354909245
GOTERM_BP_FAT	GO:0032020~ISG15-protein conjugation	3	0.47770700636942676	0.005461701977468021	USP18, ISG15, UBE2L6	420	4	13588	24.264285714285712	0.9999741835719415	0.20519862085169382	8.950249075642258
GOTERM_BP_FAT	GO:0002428~antigen processing and presentation of peptide antigen via MHC class Ib	3	0.47770700636942676	0.005461701977468021	TAP2, H2-Q8, B2M	420	4	13588	24.264285714285712	0.9999741835719415	0.20519862085169382	8.950249075642258
GOTERM_BP_FAT	GO:0060751~mammary gland duct branch elongation	3	0.47770700636942676	0.008917526703601521	WNT5A, AREG, TGFB1	420	5	13588	19.41142857142857	0.9999999686818271	0.2738384206461256	14.217791620940046
GOTERM_BP_FAT	GO:0042695~thelarche	3	0.47770700636942676	0.013104689733316282	WNT5A, AREG, TGFB1	420	6	13588	16.176190476190477	0.9999999999911096	0.33662847066253454	20.215721851080293
GOTERM_BP_FAT	GO:0060744~mammary gland branching involved in thelarche	3	0.47770700636942676	0.013104689733316282	WNT5A, AREG, TGFB1	420	6	13588	16.176190476190477	0.9999999999911096	0.33662847066253454	20.215721851080293
GOTERM_BP_FAT	GO:0002475~antigen processing and presentation via MHC class Ib	3	0.47770700636942676	0.01797501822286913	TAP2, H2-Q8, B2M	420	7	13588	13.86530612244898	0.9999999999999993	0.38489450132853686	26.695137254465028
GOTERM_BP_FAT	GO:0046543~development of secondary female sexual characteristics	3	0.47770700636942676	0.029583703878466466	WNT5A, AREG, TGFB1	420	9	13588	10.784126984126983	1.0	0.5066026555471628	40.198232853060624
GOTERM_BP_FAT	GO:0006684~sphingomyelin metabolic process	3	0.47770700636942676	0.03623666287928797	CLN3, SGMS2, SMPDL3A	420	10	13588	9.705714285714285	1.0	0.5466514155216375	46.84268575809188
GOTERM_BP_FAT	GO:0045136~development of secondary sexual characteristics	3	0.47770700636942676	0.043401815119016904	WNT5A, AREG, TGFB1	420	11	13588	8.823376623376623	1.0	0.5862134614121112	53.21812419195812
GOTERM_BP_FAT	GO:0030279~negative regulation of ossification	3	0.47770700636942676	0.05104140735696909	ENPP1, SOX9, TGFB1	420	12	13588	8.088095238095239	1.0	0.6251278304135137	59.218931051985216
GOTERM_BP_FAT	GO:0021544~subpallium development	3	0.47770700636942676	0.05911951800233853	BBS4, BBS2, FGF8	420	13	13588	7.465934065934065	1.0	0.6532058025364119	64.77158984754749
GOTERM_BP_FAT	GO:0006692~prostanoid metabolic process	3	0.47770700636942676	0.06760198048309014	PTGS2, PTGES, PTGS1	420	14	13588	6.93265306122449	1.0	0.6634072528964072	69.83137143943677
GOTERM_BP_FAT	GO:0006693~prostaglandin metabolic process	3	0.47770700636942676	0.06760198048309014	PTGS2, PTGES, PTGS1	420	14	13588	6.93265306122449	1.0	0.6634072528964072	69.83137143943677
GOTERM_BP_FAT	GO:0001759~induction of an organ	3	0.47770700636942676	0.07645630959768349	FGFR1, FGF8, FGF2	420	15	13588	6.47047619047619	1.0	0.6844972843617887	74.37821347308619
GOTERM_BP_FAT	GO:0021955~central nervous system neuron axonogenesis	3	0.47770700636942676	0.07645630959768349	NR4A2, TCTN1, GLI2	420	15	13588	6.47047619047619	1.0	0.6844972843617887	74.37821347308619
GOTERM_BP_FAT	GO:0060749~mammary gland alveolus development	3	0.47770700636942676	0.07645630959768349	SOCS2, VEGFA, AREG	420	15	13588	6.47047619047619	1.0	0.6844972843617887	74.37821347308619
GOTERM_BP_FAT	GO:0030500~regulation of bone mineralization	3	0.47770700636942676	0.08565163070439001	ANK, MGP, SOX9	420	16	13588	6.066071428571428	1.0	0.7165729432640172	78.4122501153464
GOTERM_BP_FAT	GO:0006493~protein amino acid O-linked glycosylation	3	0.47770700636942676	0.08565163070439001	GALNT7, POMT1, C1GALT1	420	16	13588	6.066071428571428	1.0	0.7165729432640172	78.4122501153464
GOTERM_BP_FAT	GO:0070167~regulation of biomineral formation	3	0.47770700636942676	0.08565163070439001	ANK, MGP, SOX9	420	16	13588	6.066071428571428	1.0	0.7165729432640172	78.4122501153464
GOTERM_BP_FAT	GO:0060425~lung morphogenesis	3	0.47770700636942676	0.09515861167793777	RDH10, FGF8, HOXA5	420	17	13588	5.709243697478992	1.0	0.7380298085081385	81.94935450684544
GOTERM_BP_FAT	GO:0045766~positive regulation of angiogenesis	3	0.47770700636942676	0.09515861167793777	BTG1, CX3CL1, FGF2	420	17	13588	5.709243697478992	1.0	0.7380298085081385	81.94935450684544
GOTERM_BP_FAT	GO:0046208~spermine catabolic process	2	0.3184713375796179	0.06072340227044171	SAT1, SMOX	420	2	13588	32.352380952380955	1.0	0.6535525139225127	65.78572212440494
GOTERM_BP_FAT	GO:0002481~antigen processing and presentation of exogenous protein antigen via MHC class Ib, TAP-dependent	2	0.3184713375796179	0.08969122903762783	TAP2, B2M	420	3	13588	21.56825396825397	1.0	0.7285852234296134	79.98825560462761
GOTERM_BP_FAT	GO:0002477~antigen processing and presentation of exogenous peptide antigen via MHC class Ib	2	0.3184713375796179	0.08969122903762783	TAP2, B2M	420	3	13588	21.56825396825397	1.0	0.7285852234296134	79.98825560462761

## Sheet: CC-FAT-Up-in spheres
Category	Term	Count	%	PValue	Genes	List Total	Pop Hits	Pop Total	Fold Enrichment	Bonferroni	Benjamini	FDR
GOTERM_CC_FAT	GO:0031224~intrinsic to membrane	198	31.528662420382165	0.08200662707434699	S100A4, ATP1B1, ADCY7, SGMS2, TGOLN1, LPAR1, AQP1, TMEM151A, HTR1B, PLD3, F11R, PTPRG, TMEM200A, COLEC12, MGAT3, ABCB1A, PDGFRA, MGAT5, ORAI2, GPR146, RTP4, CLCN2, ENPP1, ENPP2, GPR149, CACNB2, NRN1, SEMA5A, ALCAM, SERINC3, SERINC2, EPHB6, PROCR, PPP1R3F, TCTN2, LAPTM4B, SCD1, ST6GAL1, PCDH19, EPS8, ATP2A3, TGFBR3, AREG, CHRNB1, TMEM119, SLC46A1, BTBD11, TM7SF2, SLC27A1, H2-D1, RNF182, SLC23A2, P…	388	5914	12504	1.078949478609206	0.9999999999396225	0.44470740920637697	67.6393438219445
GOTERM_CC_FAT	GO:0005886~plasma membrane	127	20.222929936305732	1.3609804191704233E-5	ATP1B1, SGMS2, ADCY7, TGOLN1, LPAR1, AQP1, TAPBP, B2M, GNG8, HTR1B, INSR, 4931408A02RIK, F11R, ARC, SLCO4A1, CRYAB, H2-GS10, STIM2, TANC1, GEM, PNPLA6, RND2, TNS1, ABCB1A, VEGFA, PDGFRA, CAR9, NEU1, VAMP1, SEPT9, PAM, SNX9, BBS4, ABCA7, CGNL1, GPR146, ENPP1, ENPP2, BBS9, GPR149, CACNB2, CX3CL1, NRN1, ABCA3, SERINC3, ALCAM, EPHB6, ITGB8, MSLN, MFAP3L, BLNK, MUC1, DIXDC1, VAV3, SLC6A12, FURIN, PCDH…	388	2906	12504	1.4083978402310187	0.0037357263688874154	4.1577150102445337E-4	0.01794384805309246
GOTERM_CC_FAT	GO:0005576~extracellular region	83	13.21656050955414	1.2997947646336364E-5	GNPTG, ASPN, FGF8, GLB1L, FAM20A, 5730469M10RIK, IGFBP7, MMP28, EDIL3, MMP3, TGFB1, B2M, ST3GAL1, ISG15, SERPINE2, SMPDL3A, SERAC1, CREG1, MMP1A, FGF2, GFOD1, GPC1, MMP1B, PRSS35, LY96, OLFML2B, MMP19, MGP, MCPT8, MMP13, ADAMTS7, MMP10, NPC2, GRN, VEGFA, PLA2G7, VCAN, PGCP, CTSB, ADAMTS4, WNT5A, CCK, ADAMTSL2, MAMDC2, ENPP1, ENPP2, 1500015O10RIK, PPT1, CX3CL1, GREM1, ISM1, SMOC2, EPHB6, LGALS3BP,…	388	1680	12504	1.5921575846833578	0.0035680780599927076	4.4670755059650347E-4	0.017137209598427905
GOTERM_CC_FAT	GO:0044459~plasma membrane part	70	11.146496815286625	0.004034767962017242	ATP1B1, SGMS2, H2-D1, NBEA, CPEB1, AQP1, TENC1, B2M, TAPBP, GNG8, ANK, SLC23A2, GPC1, H2-K1, CLN3, F11R, ARC, SLCO4A1, H2-GS10, MMP19, TANC1, GEM, PNPLA6, ARHGAP26, STOM, RND2, BBS2, NPTXR, TNS1, ABCB1A, PDGFRA, SH3KBP1, CTSB, JAM2, VAMP1, CGNL1, ABCA7, BBS4, PAM, ENPP2, BBS9, CACNB2, ALCAM, LY6A, RGMB, RAB43, ITGB8, 9030425E11RIK, GPNMB, TMEM45A, LY6C1, MUC1, DIXDC1, SLC6A12, TMEM8, H2-Q8, LY6C2…	388	1633	12504	1.3814306727861567	0.6710355667825698	0.0568369317305355	5.1912451834252415
GOTERM_CC_FAT	GO:0044421~extracellular region part	54	8.598726114649681	3.5532095839654024E-8	ASPN, MMP28, MMP3, TGFB1, SERPINE2, SMPDL3A, SERAC1, MMP1A, MMP1B, GPC1, FGF2, LY96, OLFML2B, MMP19, MGP, MMP13, ADAMTS7, MMP10, GRN, VEGFA, PLA2G7, VCAN, ADAMTS4, WNT5A, MAMDC2, ADAMTSL2, ENPP1, PPT1, CX3CL1, GREM1, SMOC2, LGALS3BP, COL7A1, C1QTNF1, COL6A3, TCTN1, AGRN, OLFM1, DPT, SPP1, COL18A1, PLAT, HAPLN4, GGH, TNFSF9, NTN1, SOD3, ARSA, HBEGF, TGFBR3, CP, AREG, CHRD, IGFBP5	388	774	12504	2.2483816830496286	9.771278785208892E-6	2.442828647364337E-6	4.6851170865114256E-5
GOTERM_CC_FAT	GO:0005783~endoplasmic reticulum	41	6.528662420382165	0.00415539659560602	CYP2U1, TM7SF2, SLC27A1, CYP2F2, PTGS2, HSD3B7, PTGS1, ERLEC1, TAPBP, TMEM173, PLOD2, TAP2, POMT1, SHISA5, IIGP1, HSD17B7, AGPAT2, OLFM1, PLD3, SCD1, CLN3, CCPG1, STIM2, SLC24A6, MGP, CYP4V3, ITPR3, PNPLA6, TMEM38B, AGTRAP, ITPR2, MGST3, RDH10, ATP2A3, ERN1, TGFBR3, ORMDL2, PTGFRN, LEPREL1, H2-DMA, MGST1	388	838	12504	1.576729080038383	0.6818126498588788	0.05564747581946328	5.342543443339121
GOTERM_CC_FAT	GO:0000267~cell fraction	40	6.369426751592357	7.84365959702448E-6	CYP2U1, SAT1, GNPTG, SNX9, PTGS2, CYP2F2, PTGS1, PPT1, CPEB1, GLI2, ITM2B, ITM2C, TAPBP, TNFRSF1B, PTGES, TPP1, PPP3CA, FNDC3A, NT5E, SDF4, PLD3, CLN3, A4GALT, CRYAB, ITPR3, PNPLA6, BCL2L11, ITPR2, MGST3, PCX, RDH10, LAMP2, LRP1, EPS8, ARSA, SH3KBP1, CTSB, SYNGAP1, VAMP1, MGST1	388	596	12504	2.162872759980627	0.0021546901638768157	3.080975065902214E-4	0.010341837302196843
GOTERM_CC_FAT	GO:0005794~Golgi apparatus	36	5.7324840764331215	0.0022683646421537743	GNPTG, ABCA7, SGMS2, GALNT7, HS3ST1, TGOLN1, RABGAP1L, NBEA, PPT1, ITM2B, ABCA5, ST3GAL1, SERINC3, GALNTL4, MSLN, MAN1A, IIGP1, FNDC3A, RAB20, SDF4, SCAMP1, NMNAT2, CLN3, ST6GAL1, A4GALT, MARCH9, FURIN, SOD3, AGTRAP, CHST1, MGAT3, ABCB1A, GLA, PTGFRN, LEPREL1, MGAT5	388	682	12504	1.701121625298546	0.4644756141049323	0.040779135417475576	2.949983951498636
GOTERM_CC_FAT	GO:0005626~insoluble fraction	35	5.573248407643312	4.2590206484386674E-5	CYP2U1, GNPTG, SNX9, PTGS2, CYP2F2, PTGS1, PPT1, CPEB1, GLI2, ITM2B, ITM2C, TAPBP, TNFRSF1B, PTGES, PPP3CA, FNDC3A, NT5E, PLD3, CLN3, A4GALT, CRYAB, ITPR3, PNPLA6, BCL2L11, ITPR2, MGST3, RDH10, LAMP2, LRP1, EPS8, SH3KBP1, ARSA, SYNGAP1, VAMP1, MGST1	388	528	12504	2.1362464854732894	0.011644231232150859	0.0011705699683588477	0.05614314932343989
GOTERM_CC_FAT	GO:0005624~membrane fraction	34	5.414012738853503	5.019479735845593E-5	CYP2U1, GNPTG, SNX9, PTGS2, CYP2F2, PTGS1, PPT1, CPEB1, GLI2, ITM2B, ITM2C, TAPBP, TNFRSF1B, PTGES, PPP3CA, FNDC3A, NT5E, PLD3, CLN3, A4GALT, ITPR3, PNPLA6, BCL2L11, ITPR2, MGST3, RDH10, LAMP2, LRP1, EPS8, SH3KBP1, ARSA, SYNGAP1, VAMP1, MGST1	388	510	12504	2.1484536082474226	0.013709078550534937	0.001254114369449999	0.06616458749224563
GOTERM_CC_FAT	GO:0005615~extracellular space	30	4.777070063694268	0.0012179284461768677	ENPP1, PPT1, CX3CL1, GREM1, TGFB1, SERPINE2, SMPDL3A, C1QTNF1, COL6A3, TCTN1, AGRN, GPC1, FGF2, OLFM1, SPP1, PLAT, LY96, GGH, MGP, TNFSF9, SOD3, GRN, VEGFA, PLA2G7, ARSA, HBEGF, AREG, CP, CHRD, IGFBP5	388	511	12504	1.8919845865192566	0.28475808370134503	0.027541493028845565	1.5940482100358921
GOTERM_CC_FAT	GO:0031012~extracellular matrix	29	4.617834394904459	3.525487677985923E-7	WNT5A, ASPN, ADAMTSL2, MAMDC2, MMP28, MMP3, TGFB1, SMOC2, LGALS3BP, COL7A1, SERAC1, COL6A3, AGRN, MMP1A, GPC1, MMP1B, DPT, COL18A1, HAPLN4, OLFML2B, MMP19, NTN1, MMP13, ADAMTS7, MMP10, VEGFA, TGFBR3, VCAN, ADAMTS4	388	309	12504	3.0245220698628765	9.694622865819014E-5	1.9389997661045655E-5	4.6485551369324085E-4
GOTERM_CC_FAT	GO:0031410~cytoplasmic vesicle	29	4.617834394904459	0.0022685128436086294	PAM, SLC27A1, TGOLN1, 1500015O10RIK, PPT1, ABCA3, TGFB1, TPP1, GPNMB, FNDC3A, PLAT, SCAMP1, CLN3, ARC, GGH, TMEM74, FURIN, AGTRAP, RND2, STOM, LAMP2, SH3KBP1, SEMA4C, ARSA, CTSD, NEU1, CTSB, VAMP1, EPN2	388	508	12504	1.8397191330465137	0.46449748879116626	0.03828233241218326	2.9501740302896984
GOTERM_CC_FAT	GO:0031982~vesicle	29	4.617834394904459	0.0030480688909525467	PAM, SLC27A1, TGOLN1, 1500015O10RIK, PPT1, ABCA3, TGFB1, TPP1, GPNMB, FNDC3A, PLAT, SCAMP1, CLN3, ARC, GGH, TMEM74, FURIN, AGTRAP, RND2, STOM, LAMP2, SH3KBP1, SEMA4C, ARSA, CTSD, NEU1, CTSB, VAMP1, EPN2	388	519	12504	1.8007270126929265	0.5680731446498652	0.04818281517288403	3.9452627434834464
GOTERM_CC_FAT	GO:0005764~lysosome	27	4.2993630573248405	3.954486121280829E-11	IL4I1, CTSA, PPT1, ABCA5, SIAE, TPP1, DPP7, GBA, CLN3, GGH, MARCH9, TMEM74, DNASE2A, GNS, CTSL, LAMP2, NPC2, GLA, ARSA, GAA, CTSD, NEU1, CTSB, H2-DMA, CTSH, DRAM1, CTSF	388	178	12504	4.888335456967451	1.0874823153095292E-8	1.0874823153095292E-8	5.2142190565263036E-8
GOTERM_CC_FAT	GO:0000323~lytic vacuole	27	4.2993630573248405	4.4970014650811485E-11	IL4I1, CTSA, PPT1, ABCA5, SIAE, TPP1, DPP7, GBA, CLN3, GGH, MARCH9, TMEM74, DNASE2A, GNS, CTSL, LAMP2, NPC2, GLA, ARSA, GAA, CTSD, NEU1, CTSB, H2-DMA, CTSH, DRAM1, CTSF	388	179	12504	4.8610263203363475	1.2366757506931947E-8	6.183378808977125E-9	5.929565727313957E-8
GOTERM_CC_FAT	GO:0005773~vacuole	27	4.2993630573248405	8.44256658333308E-10	IL4I1, CTSA, PPT1, ABCA5, SIAE, TPP1, DPP7, GBA, CLN3, GGH, MARCH9, TMEM74, DNASE2A, GNS, CTSL, LAMP2, NPC2, GLA, ARSA, GAA, CTSD, NEU1, CTSB, H2-DMA, CTSH, DRAM1, CTSF	388	204	12504	4.265312310491208	2.3217055589164204E-7	7.739019125541091E-8	1.1132026078719548E-6
GOTERM_CC_FAT	GO:0005578~proteinaceous extracellular matrix	26	4.140127388535031	5.727528100748115E-6	WNT5A, ASPN, ADAMTSL2, MAMDC2, MMP28, MMP3, TGFB1, SMOC2, LGALS3BP, COL7A1, AGRN, MMP1A, GPC1, MMP1B, DPT, COL18A1, HAPLN4, MMP19, NTN1, MMP13, ADAMTS7, MMP10, VEGFA, TGFBR3, VCAN, ADAMTS4	388	297	12504	2.821201707799646	0.001573834959150422	2.6247800301426594E-4	0.007551822810492048
GOTERM_CC_FAT	GO:0012505~endomembrane system	25	3.9808917197452227	0.04412623679188525	GNPTG, SGMS2, NBEA, ST3GAL1, PTGES, POMT1, SHISA5, TFDP2, MAN1A, FNDC3A, LAPTM4B, SCAMP1, CLN3, ST6GAL1, CCPG1, FURIN, PNPLA6, CHST1, LAMP2, LRP1, ABCB1A, ERN1, SEMA4C, TSGA10, EPN2	388	535	12504	1.5059254263416513	0.9999959248007362	0.3299089245758997	44.846956475524166
GOTERM_CC_FAT	GO:0016023~cytoplasmic membrane-bounded vesicle	22	3.5031847133757963	0.01831964668630889	SCAMP1, PLAT, CLN3, ARC, TGOLN1, GGH, 1500015O10RIK, PPT1, ABCA3, FURIN, TGFB1, STOM, LAMP2, TPP1, ARSA, SEMA4C, CTSD, NEU1, CTSB, GPNMB, FNDC3A, EPN2	388	414	12504	1.712535484834902	0.9938087643190185	0.18403582116972328	21.635207810035762
GOTERM_CC_FAT	GO:0031988~membrane-bounded vesicle	22	3.5031847133757963	0.021088829724160554	SCAMP1, PLAT, CLN3, ARC, TGOLN1, GGH, 1500015O10RIK, PPT1, ABCA3, FURIN, TGFB1, STOM, LAMP2, TPP1, ARSA, SEMA4C, CTSD, NEU1, CTSB, GPNMB, FNDC3A, EPN2	388	420	12504	1.6880706921944033	0.9971528970941999	0.20183546018177123	24.500391644065378
GOTERM_CC_FAT	GO:0009986~cell surface	21	3.343949044585987	0.0013083835693300403	H2-K1, MUC1, LY6C1, ENPP1, MRC2, MMP19, H2-D1, CX3CL1, H2-Q8, LY6C2, IL6RA, ADAMTS7, ALCAM, LY6A, CDH13, LRP1, LAYN, ARSA, TGFBR3, CTSB, AGRN, GPC1	388	305	12504	2.218894710157174	0.3023523261194171	0.027315463598530654	1.7114957401683673
GOTERM_CC_FAT	GO:0044431~Golgi apparatus part	16	2.547770700636943	0.004738236407588165	GNPTG, SCAMP1, CLN3, ST6GAL1, A4GALT, SGMS2, HS3ST1, TGOLN1, NBEA, FURIN, SOD3, CHST1, ST3GAL1, ABCB1A, MAN1A, SDF4	388	227	12504	2.271492801671284	0.7291287856170701	0.06030112402733345	6.070430729499399
GOTERM_CC_FAT	GO:0042598~vesicular fraction	15	2.388535031847134	0.0015809357035034427	GNPTG, CYP2U1, SNX9, PTGS2, CYP2F2, PTGS1, ITPR3, ITPR2, TAPBP, MGST3, RDH10, PTGES, PPP3CA, FNDC3A, MGST1	388	182	12504	2.6560552849212646	0.3528009252001224	0.030600689990260665	2.06459647818632
GOTERM_CC_FAT	GO:0005792~microsome	14	2.229299363057325	0.003269585690081943	GNPTG, CYP2U1, SNX9, PTGS2, CYP2F2, PTGS1, ITPR3, ITPR2, TAPBP, MGST3, RDH10, PTGES, PPP3CA, MGST1	388	176	12504	2.5634957825679474	0.5936779380608669	0.048802767614563036	4.226299486368246
GOTERM_CC_FAT	GO:0031225~anchored to membrane	14	2.229299363057325	0.01228703873337426	LY6C1, CPM, MMP19, RFTN2, NRN1, LY6C2, LY6A, CDH13, RGMB, MSLN, GFRA1, CP, NT5E, GPC1, CD14	388	207	12504	2.1795906170626025	0.9666222521017521	0.13208463628572464	15.042194918405293
GOTERM_CC_FAT	GO:0005768~endosome	13	2.0700636942675157	0.09223428199287306	SCAMP1, ABCA7, CLN3, ARC, RABGAP1L, TPD52L1, FURIN, ABCA5, LAMP2, ARSA, H2-DMA, SDF4, INSR	388	252	12504	1.6624938635247912	0.999999999997228	0.4693253954775357	72.08360927612078
GOTERM_CC_FAT	GO:0009897~external side of plasma membrane	12	1.910828025477707	0.055628385090762095	LY6C1, H2-K1, MMP19, H2-D1, H2-Q8, LY6C2, ALCAM, LY6A, CDH13, LRP1, ARSA, CTSB, GPC1	388	206	12504	1.8772895606045443	0.9999998540163008	0.3705661015048305	52.984107346107564
GOTERM_CC_FAT	GO:0030141~secretory granule	9	1.4331210191082804	0.02876473853848213	PLAT, SCAMP1, ARC, LAMP2, ARSA, 1500015O10RIK, FNDC3A, ABCA3, TGFB1	388	117	12504	2.47898493259318	0.9996732456403872	0.24922827737464992	31.944187462538707
GOTERM_CC_FAT	GO:0000139~Golgi membrane	9	1.4331210191082804	0.0626281365057482	ST3GAL1, GNPTG, CLN3, ST6GAL1, SGMS2, ABCB1A, MAN1A, FURIN, CHST1	388	137	12504	2.1170893219956355	0.9999999811298135	0.3898477352464551	57.37720963546008
GOTERM_CC_FAT	GO:0016323~basolateral plasma membrane	9	1.4331210191082804	0.07152422926712432	DIXDC1, ATP1B1, TNS1, SLC23A2, LAYN, SH3KBP1, AQP1, TENC1, ARHGAP26	388	141	12504	2.05703005044966	0.9999999986294082	0.4239542507342037	62.413155412758826
GOTERM_CC_FAT	GO:0042611~MHC protein complex	7	1.1146496815286624	0.005173994513182752	H2-K1, H2-GS10, H2-D1, H2-T23, H2-DMA, H2-Q8, B2M	388	52	12504	4.338223632038065	0.759862149247769	0.06278524114492812	6.6112498217839155
GOTERM_CC_FAT	GO:0045121~membrane raft	7	1.1146496815286624	0.04792351386672894	STOM, CLN3, RGMB, TNFRSF1B, PPT1, LIPE, CD14	388	85	12504	2.6539721043056397	0.9999986361838995	0.34429103849710696	47.667013411769354
GOTERM_CC_FAT	GO:0005625~soluble fraction	7	1.1146496815286624	0.08649127241626037	SAT1, SNX9, PCX, CRYAB, TPP1, CTSB, SDF4	388	99	12504	2.2786629178381754	0.9999999999842967	0.4548856333658978	69.66293219437514
GOTERM_CC_FAT	GO:0042612~MHC class I protein complex	6	0.9554140127388535	0.009185488765487125	H2-K1, H2-GS10, H2-D1, H2-T23, H2-Q8, B2M	388	42	12504	4.603829160530192	0.920950596529583	0.10446503352759495	11.456463426914276
GOTERM_CC_FAT	GO:0005925~focal adhesion	6	0.9554140127388535	0.031116377087246776	DIXDC1, TNS1, LAYN, SH3KBP1, TENC1, ARHGAP26	388	57	12504	3.3922951709169835	0.9998322377881308	0.2590019937942205	34.085178237892734
GOTERM_CC_FAT	GO:0005924~cell-substrate adherens junction	6	0.9554140127388535	0.040053818249544584	DIXDC1, TNS1, LAYN, SH3KBP1, TENC1, ARHGAP26	388	61	12504	3.1698495859388203	0.9999868812179629	0.3125151736002809	41.66695733970685
GOTERM_CC_FAT	GO:0030055~cell-substrate junction	6	0.9554140127388535	0.05321186728519589	DIXDC1, TNS1, LAYN, SH3KBP1, TENC1, ARHGAP26	388	66	12504	2.92970946579194	0.9999997052040067	0.36597451572441986	51.37281558501796
GOTERM_CC_FAT	GO:0005604~basement membrane	6	0.9554140127388535	0.07537737162758668	COL18A1, SMOC2, COL7A1, VEGFA, AGRN, NTN1	388	73	12504	2.6487784211269596	0.9999999995632405	0.4245518277675927	64.41869029542671
GOTERM_CC_FAT	GO:0005802~trans-Golgi network	5	0.7961783439490446	0.05681212475762257	SCAMP1, CLN3, TGOLN1, NBEA, SOD3	388	47	12504	3.4283834174161	0.9999998966030951	0.36844016717558403	53.755266039238045
GOTERM_CC_FAT	GO:0014069~postsynaptic density	5	0.7961783439490446	0.07243540613580363	ARC, EPS8, SEMA4C, TANC1, CPEB1	388	51	12504	3.159490600363857	0.9999999989537276	0.4196702131861949	62.89662890766443
GOTERM_CC_FAT	GO:0030665~clathrin coated vesicle membrane	4	0.6369426751592357	0.0993142761904234	SCAMP1, SEMA4C, FURIN, EPN2	388	36	12504	3.580756013745704	0.9999999999996781	0.4877519979674847	74.82197416400854
GOTERM_CC_FAT	GO:0060170~cilium membrane	3	0.47770700636942676	0.02364239622009946	BBS4, BBS2, BBS9	388	8	12504	12.085051546391753	0.9986118032124682	0.21627291997616427	27.056375756448503

## Sheet: BP-FAT_Down in spheres
Category	Term	Count	%	PValue	Genes	List Total	Pop Hits	Pop Total	Fold Enrichment	Bonferroni	Benjamini	FDR
GOTERM_BP_FAT	GO:0007049~cell cycle	160	18.244013683010262	1.4582347893486955E-77	ADCY3, KIFC1, JUB, PRC1, DBF4, KNTC1, PKMYT1, AURKA, AURKB, PTTG1, CDCA8, DDX11, OIP5, CDKN2C, B230120H23RIK, INCENP, CDCA2, PMS2, H2AFX, NUP37, CCNA2, CDCA5, ASPM, CDCA3, RAN, SGOL2, LIG1, RBL1, SGOL1, 4632434I11RIK, SKP2, ESPL1, TOPBP1, TACC3, AHR, 6720463M24RIK, WEE1, NCAPD3, GM9430, ESCO2, NCAPD2, UHRF1, MAD2L1, TIMELESS, SPAG5, STMN1, NEK6, DSCC1, GM3833, CCDC99, NEK2, MRE11A, TIPIN, CHEK1, …	638	611	13588	5.577166780394953	3.343732371976559E-74	3.343732371976559E-74	2.547188353871095E-74
GOTERM_BP_FAT	GO:0022402~cell cycle process	118	13.45496009122007	3.866923656609792E-63	ADCY3, KIFC1, DBF4, KNTC1, AURKB, PTTG1, CDCA8, OIP5, INCENP, CDCA2, PMS2, NUP37, H2AFX, CCNA2, CDCA5, ASPM, CDCA3, RAN, SGOL2, SGOL1, SKP2, 4632434I11RIK, ESPL1, TOPBP1, TACC3, NCAPD3, GM9430, WEE1, 6720463M24RIK, NCAPD2, MAD2L1, TIMELESS, SPAG5, STMN1, NEK6, CCDC99, GM3833, NEK2, MRE11A, TIPIN, CHEK1, ANLN, RCC1, SPC24, SPC25, NCAPG2, SAC3D1, NPM1, MNS1, FBXO5, SKA1, LFNG, HELLS, TFDP1, ERCC6L,…	638	393	13588	6.3947609817575595	8.866855944606253E-60	2.955618648202084E-60	6.754593276316214E-60
GOTERM_BP_FAT	GO:0022403~cell cycle phase	110	12.542759407069557	2.9546588878069772E-64	ADCY3, KIFC1, DBF4, KNTC1, AURKB, PTTG1, CDCA8, OIP5, INCENP, CDCA2, PMS2, NUP37, H2AFX, CDCA5, CCNA2, ASPM, CDCA3, RAN, SGOL2, SGOL1, SKP2, ESPL1, TOPBP1, TACC3, NCAPD3, GM9430, WEE1, 6720463M24RIK, NCAPD2, MAD2L1, TIMELESS, SPAG5, STMN1, NEK6, CCDC99, GM3833, NEK2, MRE11A, TIPIN, CHEK1, ANLN, RCC1, SPC24, SPC25, NCAPG2, SAC3D1, MNS1, FBXO5, SKA1, LFNG, HELLS, ERCC6L, TFDP1, MKI67, NUF2, BRCA2, …	638	328	13588	7.1425567703952915	6.775032829741399E-61	3.387516414870699E-61	5.161084321712754E-61
GOTERM_BP_FAT	GO:0000279~M phase	102	11.630558722919043	6.983305354073999E-63	ADCY3, KIFC1, KNTC1, PTTG1, AURKB, CDCA8, OIP5, INCENP, CDCA2, PMS2, NUP37, H2AFX, CDCA5, CCNA2, ASPM, CDCA3, RAN, SGOL2, SGOL1, TOPBP1, ESPL1, TACC3, GM9430, NCAPD3, WEE1, 6720463M24RIK, NCAPD2, MAD2L1, TIMELESS, SPAG5, STMN1, NEK6, CCDC99, GM3833, NEK2, MRE11A, TIPIN, ANLN, RCC1, SPC24, SPC25, SAC3D1, NCAPG2, FBXO5, MNS1, SKA1, LFNG, HELLS, ERCC6L, MKI67, NUF2, BRCA2, NDC80, CDC20, PMF1, PLK1, …	638	283	13588	7.676240902998549	1.6012719176891681E-59	4.0031797942229203E-60	1.2198168771825609E-59
GOTERM_BP_FAT	GO:0006259~DNA metabolic process	95	10.832383124287343	8.49895629732891E-39	HMGN1, XRCC2, PDGFB, DBF4, GM13237, PTTG1, MCM10, PRIM1, CTGF, PRIM2, PMS2, H2AFX, DTL, LIG1, NEIL3, USP1, POLE, TOPBP1, GM5806, ESCO2, GM9430, RFC5, RFC3, UHRF1, RFC4, RFC2, DSCC1, GM3833, HMGB2, BLM, MRE11A, TIPIN, CHEK1, TK1, POLE2, GM11663, HELLS, GINS1, RECQL4, GINS2, EME1, BRCA2, BRIP1, RAD54L, BRCA1, DNA2, POLD1, POLD2, PCNA, DNMT1, RAD54B, PARP1, KCTD13, CHAF1A, CHAF1B, GM6195, KIF22, CLS…	638	421	13588	4.805918137886358	1.948810678977519E-35	1.948810678977519E-36	1.4845649451474574E-35
GOTERM_BP_FAT	GO:0051301~cell division	90	10.262257696693272	2.914932080785658E-50	KIFC1, PRC1, GM15452, KNTC1, AURKB, PTTG1, FAM83D, CCNE2, CCNE1, CDC45, CDCA8, CDCA7, OIP5, INCENP, CDCA2, GM5593, NUP37, TOP2A, CCNA2, CDCA5, ASPM, CDCA3, CDC7, CDC6, CDK1, KIF11, RAN, DSN1, SGOL2, LIG1, SGOL1, CCNF, NUSAP1, UBE2C, GM9430, CDK2, NCAPD3, WEE1, 6720463M24RIK, MCM5, NCAPD2, CCND1, MAD2L1, TIMELESS, SPAG5, NSL1, BUB1B, NEK6, HAUS4, CKS1B, CCDC99, HAUS5, NEK2, HAUS1, TIPIN, ANLN, CEP…	638	281	13588	6.821361237854058	6.683939261241513E-47	9.548484658916447E-48	5.0916910656196225E-47
GOTERM_BP_FAT	GO:0000278~mitotic cell cycle	88	10.034207525655644	5.287964351440664E-54	KIFC1, DBF4, KNTC1, AURKA, AURKB, PTTG1, RHOU, FAM83D, CDCA8, OIP5, INCENP, CDCA2, GM5593, NUP37, CDCA5, CCNA2, ASPM, CDCA3, CDC6, CDK1, KIF11, ANP32B, RAN, DSN1, SGOL1, CCNF, SKP2, NUSAP1, UBE2C, GM9430, CDK2, NCAPD3, WEE1, 6720463M24RIK, NCAPD2, CCND1, MAD2L1, TIMELESS, SPAG5, NSL1, GM11223, BUB1B, STMN1, NEK6, HAUS4, CCDC99, HAUS5, NEK2, HAUS1, POLA1, TIPIN, CHEK1, ANLN, CEP55, RCC1, C79407, S…	638	244	13588	7.681175805539853	1.2125302257853443E-50	2.4250604515706888E-51	9.236812418726586E-51
GOTERM_BP_FAT	GO:0000087~M phase of mitotic cell cycle	77	8.779931584948688	1.1375987964008356E-50	KIFC1, KNTC1, AURKB, PTTG1, FAM83D, CDCA8, OIP5, INCENP, CDCA2, GM5593, NUP37, CDCA5, CCNA2, ASPM, CDCA3, CDC6, CDK1, KIF11, RAN, DSN1, SGOL1, CCNF, NUSAP1, UBE2C, GM9430, CDK2, WEE1, 6720463M24RIK, NCAPD3, NCAPD2, MAD2L1, TIMELESS, SPAG5, NSL1, BUB1B, NEK6, HAUS4, CCDC99, HAUS5, NEK2, HAUS1, TIPIN, ANLN, CEP55, RCC1, C79407, SPC24, SPC25, NCAPH, NCAPG2, SAC3D1, F630043A04RIK, BUB1, FBXO5, SKA1, …	638	194	13588	8.453252755065765	2.608514040147116E-47	4.347523400245194E-48	1.9871137533786305E-47
GOTERM_BP_FAT	GO:0007067~mitosis	75	8.551881413911062	4.0290344701372315E-49	KIFC1, KNTC1, AURKB, PTTG1, FAM83D, CDCA8, OIP5, INCENP, CDCA2, GM5593, NUP37, CDCA5, CCNA2, ASPM, CDCA3, CDC6, CDK1, KIF11, RAN, DSN1, SGOL1, CCNF, NUSAP1, UBE2C, GM9430, CDK2, WEE1, 6720463M24RIK, NCAPD3, NCAPD2, MAD2L1, TIMELESS, SPAG5, NSL1, BUB1B, NEK6, HAUS4, CCDC99, HAUS5, NEK2, HAUS1, TIPIN, ANLN, CEP55, RCC1, C79407, SPC24, SPC25, NCAPH, NCAPG2, SAC3D1, F630043A04RIK, BUB1, FBXO5, SKA1, …	638	190	13588	8.407028543144696	9.238576040024671E-46	1.154822005003084E-46	7.037762200326107E-46
GOTERM_BP_FAT	GO:0000280~nuclear division	75	8.551881413911062	4.0290344701372315E-49	KIFC1, KNTC1, AURKB, PTTG1, FAM83D, CDCA8, OIP5, INCENP, CDCA2, GM5593, NUP37, CDCA5, CCNA2, ASPM, CDCA3, CDC6, CDK1, KIF11, RAN, DSN1, SGOL1, CCNF, NUSAP1, UBE2C, GM9430, CDK2, WEE1, 6720463M24RIK, NCAPD3, NCAPD2, MAD2L1, TIMELESS, SPAG5, NSL1, BUB1B, NEK6, HAUS4, CCDC99, HAUS5, NEK2, HAUS1, TIPIN, ANLN, CEP55, RCC1, C79407, SPC24, SPC25, NCAPH, NCAPG2, SAC3D1, F630043A04RIK, BUB1, FBXO5, SKA1, …	638	190	13588	8.407028543144696	9.238576040024671E-46	1.154822005003084E-46	7.037762200326107E-46
GOTERM_BP_FAT	GO:0048285~organelle fission	75	8.551881413911062	8.615223840676322E-48	KIFC1, KNTC1, AURKB, PTTG1, FAM83D, CDCA8, OIP5, INCENP, CDCA2, GM5593, NUP37, CDCA5, CCNA2, ASPM, CDCA3, CDC6, CDK1, KIF11, RAN, DSN1, SGOL1, CCNF, NUSAP1, UBE2C, GM9430, CDK2, WEE1, 6720463M24RIK, NCAPD3, NCAPD2, MAD2L1, TIMELESS, SPAG5, NSL1, BUB1B, NEK6, HAUS4, CCDC99, HAUS5, NEK2, HAUS1, TIPIN, ANLN, CEP55, RCC1, C79407, SPC24, SPC25, NCAPH, NCAPG2, SAC3D1, F630043A04RIK, BUB1, FBXO5, SKA1, …	638	197	13588	8.108301640596407	1.9754708266670806E-44	2.194967585185645E-45	1.5048741117172663E-44
GOTERM_BP_FAT	GO:0033554~cellular response to stress	60	6.841505131128849	4.3435414865645E-15	HMGN1, CLSPN, KIF22, XRCC2, NUAK2, GM13237, PTTG1, FANCI, PMS2, TRPV4, H2AFX, FANCA, FANCB, CDK1, SGK1, DTL, GEN1, LIG1, NEIL3, USP1, POLE, TOPBP1, GM5806, ESCO2, GM5648, RAD51, EYA4, PYCR1, CCND1, UHRF1, RIF1, TIMELESS, FANCD2, HMGB2, BLM, UNG, MRE11A, POLA1, TIPIN, CHEK1, RPA1, GM7862, GM11663, FEN1, GM9855, TRIP13, EXO1, RAD51AP1, EME1, SMC6, BRIP1, BRCA2, ATAD5, RAD54L, BRCA1, DNA2, TDP1, POL…	638	404	13588	3.163040441975232	9.928391442315387E-12	6.619149672815183E-13	7.560618797697316E-12
GOTERM_BP_FAT	GO:0006974~response to DNA damage stimulus	56	6.385404789053592	1.3062923343325457E-19	HMGN1, CLSPN, KIF22, XRCC2, GM13237, PTTG1, FANCI, PMS2, H2AFX, FANCA, FANCB, CDK1, SGK1, DTL, GEN1, LIG1, NEIL3, USP1, POLE, TOPBP1, GM5806, ESCO2, GM5648, RAD51, EYA4, CCND1, UHRF1, RIF1, TIMELESS, FANCD2, HMGB2, BLM, MRE11A, UNG, POLA1, TIPIN, CHEK1, RPA1, GM7862, GM11663, FEN1, TRIP13, GM9855, EXO1, RAD51AP1, EME1, SMC6, BRIP1, BRCA2, ATAD5, RAD54L, BRCA1, DNA2, TDP1, POLD1, PCNA, RAD54B, PAR…	638	287	13588	4.155669393684533	2.995328322624527E-16	2.304098709711175E-17	2.2817811267889727E-16
GOTERM_BP_FAT	GO:0006260~DNA replication	53	6.043329532497149	2.0859546012471072E-31	GM6195, PDGFB, DBF4, MCM10, CDT1, PRIM1, CCNE2, CCNE1, CDC45, MCM8, MCM7, CTGF, PRIM2, CDC6, GM6091, DTL, LIG1, POLE, MCM2, RBBP7, MCM3, MCM4, GM9430, MCM5, MCM6, RAD51, RFC5, RFC3, RFC4, RFC2, RRM2, RRM1, DSCC1, BLM, LIN9, TIPIN, POLA1, POLA2, TK1, RPA1, RPA2, POLE2, FEN1, GINS1, GINS2, BRCA2, BRCA1, DNA2, POLD1, POLD2, PCNA, CHTF18, KCTD13, CHAF1A, CHAF1B	638	152	13588	7.426208546444482	4.783093900659617E-28	4.348267182417834E-29	3.643665139393355E-28
GOTERM_BP_FAT	GO:0007010~cytoskeleton organization	52	5.929304446978335	2.1690920034796833E-14	DLC1, RHOJ, NUAK2, PDGFB, RHOU, ACTG1, GM8399, B230120H23RIK, TUBB5, RANBP1, TUBA1B, KIF11, TPX2, PRKCI, NUSAP1, TMSB10, ESPL1, TACC3, SIRPA, GM3226, TAGLN, TPPP, LIMCH1, GM11223, STMN1, DBN1, HAUS4, ABLIM1, FGD1, CCDC99, HAUS5, HAUS1, ACTG-PS1, FHDC1, SRF, SPC25, SORBS1, SAC3D1, NPM1, PALM2, FBXO5, CNN2, CNN1, GM12715, GM5620, CEP192, NUF2, KIF18A, EVL, CENPE, NDC80, BIRC5, CSRP1, RACGAP1, GM141…	638	326	13588	3.397195992076466	4.964195721157694E-11	3.1026292646174625E-12	3.781419621873283E-11
GOTERM_BP_FAT	GO:0006281~DNA repair	48	5.473204104903079	9.834973248206487E-19	HMGN1, CLSPN, KIF22, XRCC2, GM13237, PTTG1, FANCI, PMS2, H2AFX, FANCA, FANCB, GEN1, NEIL3, LIG1, USP1, POLE, TOPBP1, GM5806, ESCO2, GM5648, RAD51, EYA4, UHRF1, FANCD2, HMGB2, BLM, UNG, MRE11A, POLA1, CHEK1, RPA1, GM7862, GM11663, FEN1, GM9855, TRIP13, EXO1, RAD51AP1, EME1, SMC6, BRCA2, BRIP1, RAD54L, BRCA1, DNA2, TDP1, POLD1, PCNA, RAD54B, PARP1, CHAF1A, CHAF1B, BARD1	638	222	13588	4.604930949758536	2.2551593658137474E-15	1.610828118438391E-16	1.717935239335109E-15
GOTERM_BP_FAT	GO:0051276~chromosome organization	44	5.017103762827822	4.1496457438623016E-7	HMGN1, CCDC99, BLM, NEK2, EZH2, HAT1, H1FX, PTTG1, GM10094, RPA1, GM7862, NCAPH, HJURP, CENPA, NCAPG2, H2AFZ, H2AFX, ASF1B, GM11663, CDCA5, TOP2A, GM8203, HELLS, SGOL2, RBL1, SUV39H1, KIF18A, NUSAP1, BRCA2, SAP18, WHSC1, MCM2, RBBP7, RAD54L, SMC2, NCAPD3, GSG2, NCAPD2, SMC4, CENPH, EYA4, MAD2L1, FANCD2, H2AFY3, H2AFY2, DNMT1, CIT, PARP1	638	404	13588	2.3195629907818365	9.510614205821E-4	3.281028816004561E-5	7.248416560634574E-4
GOTERM_BP_FAT	GO:0006412~translation	43	4.903078677309008	1.22156991155742E-9	RPL17, RPL36A, RPL19, RPL14, RPL13, GM15450, GM10159, GM5786, RBM3, GM10196, GM9083, GM15453, GM14166, RPL22L1, RPS2, GM10059, GM5451, GM13841, GM15501, GM10259, GM14217, TARSL2, RPS27A, GM15500, RPL35A, GM6636, GM6472, GM13573, GM10184, GM8731, GM6834, GM7618, GM5908, GM11539, GM7079, RPS18, GM6136, RPS19, RPS16, GM8430, GM6525, RPS13, GM4167, RPS11, GM10288, GM14072, KPNA2, GM14303, GM7290, GM1…	638	319	13588	2.870864083489746	2.8010559884883435E-6	1.1204239014350748E-7	2.1337913214125592E-6
GOTERM_BP_FAT	GO:0007017~microtubule-based process	37	4.218928164196123	1.267687641857473E-11	HAUS4, KIF23, KIF22, KIFC1, CCDC99, HAUS5, TUBB2B, TUBB2A, HAUS1, SPC25, KIF2C, SAC3D1, KIF4, NPM1, TUBB5, FBXO5, TUBB6, RANBP1, TUBA1B, KIF11, GM5620, CEP192, KIF15, NUF2, TPX2, KIF18A, NUSAP1, KIF18B, NDC80, CENPE, BIRC5, ESPL1, TACC3, GM14150, BRCA1, GM3226, TPPP, GM11223, KIF20B, STMN1, KIF20A	638	211	13588	3.734686297523362	2.9068038531754326E-8	1.4534019543432919E-9	2.214345373729998E-8
GOTERM_BP_FAT	GO:0043933~macromolecular complex subunit organization	37	4.218928164196123	2.2632065879302897E-5	CAV1, TUBB2B, TUBB2A, H1FX, PDSS1, HJURP, CENPA, NPM1, TUBB5, H2AFZ, TUBB6, FBXO5, SCARB1, H2AFX, FAS, LSM2, GEMIN6, ASF1B, TUBA1B, KPNB1, GM8203, MYC, HELLS, DCTPP1, GM5620, 1110034A24RIK, KIF18A, EVL, MCM2, GM14150, GM3226, TTF2, CENPH, TPPP, H2AFY3, RRM2, IPO5, RRM1, H2AFY2, GM11223, CELF2, STMN1	638	367	13588	2.1471902146523965	0.0505723164731422	0.0012061537394966182	0.039525454808408966
GOTERM_BP_FAT	GO:0051726~regulation of cell cycle	35	3.990877993158495	3.4704905130601754E-10	CLSPN, DBF4, TIPIN, CHEK1, CITED2, CDT1, CCNE2, CCNE1, B230120H23RIK, NPM1, FBXO5, RANBP1, H2AFX, ZWILCH, MYC, RUNX3, RECQL4, CDK1, CEP192, GMNN, SKP2, DBC1, NUSAP1, BRCA2, CENPF, BIRC5, CENPE, TACC3, PKIA, CCND1, PLK4, MAD2L1, GADD45G, GADD45B, NEK6	638	214	13588	3.483285969589547	7.957831692495532E-7	3.4599281439895435E-8	6.062119251026843E-7
GOTERM_BP_FAT	GO:0007155~cell adhesion	35	3.990877993158495	0.0749564426598806	DLC1, JUB, EPDR1, CTNND2, POSTN, COL2A1, CDH3, GM13841, VCAM1, WISP2, CGREF1, SORBS1, CTGF, FAT4, PVRL2, COL12A1, KLRA4, SCARB1, ZYX, COL11A1, CYR61, SVEP1, PTPRF, NID1, NID2, MCAM, SIRPA, RPL29, PCDH18, ARVCF, HSPB11, STAB1, FBLN5, CDH18, PERP, EDA	638	561	13588	1.3287401024815741	1.0	0.693692113142155	74.35905400983914
GOTERM_BP_FAT	GO:0022610~biological adhesion	35	3.990877993158495	0.07576890645593495	DLC1, JUB, EPDR1, CTNND2, POSTN, COL2A1, CDH3, GM13841, VCAM1, WISP2, CGREF1, SORBS1, CTGF, FAT4, PVRL2, COL12A1, KLRA4, SCARB1, ZYX, COL11A1, CYR61, SVEP1, PTPRF, NID1, NID2, MCAM, SIRPA, RPL29, PCDH18, ARVCF, HSPB11, STAB1, FBLN5, CDH18, PERP, EDA	638	562	13588	1.3263757962494003	1.0	0.6953634789554216	74.74959952066527
GOTERM_BP_FAT	GO:0010605~negative regulation of macromolecule metabolic process	34	3.8768529076396807	0.03450301968774299	CLSPN, JDP2, CAV1, BLM, RBM3, TIPIN, GM15453, HAT1, CITED2, CDT1, AHRR, NPM1, FBXO5, MYC, HELLS, HNRNPAB, BMP4, ZFP57, GMNN, RBL1, SUV39H1, SKP2, BRCA2, CENPF, RBBP7, PKIA, MXD3, CTNNBIP1, DLX2, DLX1, PA2G4, TIMELESS, ID2, DNMT1, ID3	638	506	13588	1.4310778495049996	1.0	0.49455166251850957	45.84545118973568
GOTERM_BP_FAT	GO:0007059~chromosome segregation	32	3.6488027366020526	1.2209232061213467E-24	CCDC99, NEK2, PTTG1, EBNA1BP2, SPC25, HJURP, INCENP, F630043A04RIK, NUP37, SKA1, CDCA5, TOP2A, FAM33A, DSN1, SGOL2, SGOL1, NUF2, KIF18A, CENPF, NUSAP1, BIRC5, NDC80, CENPE, ESPL1, PMF1, NCAPD3, SMC4, CENPH, MAD2L1, NSL1, CIT, NEK6	638	64	13588	10.648902821316613	2.799576911636248E-21	2.3329807596968735E-22	2.13266162233879E-21
GOTERM_BP_FAT	GO:0065003~macromolecular complex assembly	31	3.534777651083238	6.021623698437596E-4	CAV1, TUBB2B, TUBB2A, H1FX, PDSS1, HJURP, CENPA, NPM1, H2AFZ, TUBB5, TUBB6, FBXO5, H2AFX, FAS, LSM2, GEMIN6, ASF1B, TUBA1B, KPNB1, GM8203, MYC, HELLS, DCTPP1, GM5620, 1110034A24RIK, MCM2, GM14150, GM3226, TPPP, H2AFY3, RRM2, IPO5, RRM1, H2AFY2, CELF2	638	338	13588	1.9533490382296748	0.7487166774564217	0.023532047846673954	1.046635099526838
GOTERM_BP_FAT	GO:0051172~negative regulation of nitrogen compound metabolic process	30	3.4207525655644244	0.01350206916888341	CLSPN, JDP2, CAV1, BLM, TIPIN, HAT1, CITED2, CDT1, AHRR, NPM1, MYC, HELLS, HNRNPAB, ZFP57, GMNN, RBL1, SUV39H1, BRCA2, CENPF, RBBP7, PKIA, MXD3, CTNNBIP1, DLX2, DLX1, PA2G4, TIMELESS, ID2, DNMT1, ID3	638	401	13588	1.5933520430897679	0.999999999999971	0.27725554664755814	21.136813088964846
GOTERM_BP_FAT	GO:0006396~RNA processing	30	3.4207525655644244	0.03763643880119201	GAR1, LSM6, RBM3, GM15453, SNRPD1, EBNA1BP2, NPM3-PS1, LSM5, LSM4, MAGOHB, LSM2, GEMIN6, GM7846, SNRPA1, EXOSC8, GM5461, GM5643, GM13573, EXOSC2, GM8396, HNRNPA1, TTF2, FBL, SLBP, GM14277, DIS3, DDX39, PA2G4, GM13092, GM8186, CELF2, THOC4, SNRNP40, GM7879, SNRPF, SNRPE, NHP2, GM12571, SNRPG	638	437	13588	1.4620919205469038	1.0	0.5166403451795125	48.83475595363092
GOTERM_BP_FAT	GO:0045934~negative regulation of nucleobase, nucleoside, nucleotide and nucleic acid metabolic process	29	3.30672748004561	0.020566387917747023	CLSPN, JDP2, BLM, TIPIN, HAT1, CDT1, CITED2, AHRR, NPM1, MYC, HELLS, HNRNPAB, ZFP57, GMNN, RBL1, SUV39H1, BRCA2, CENPF, RBBP7, PKIA, MXD3, CTNNBIP1, DLX2, DLX1, PA2G4, TIMELESS, ID2, DNMT1, ID3	638	397	13588	1.5557591023585986	1.0	0.3647988467876153	30.440757057664626
GOTERM_BP_FAT	GO:0031327~negative regulation of cellular biosynthetic process	29	3.30672748004561	0.04941636207342502	CLSPN, JDP2, CAV1, TIPIN, HAT1, CDT1, CITED2, AHRR, MYC, HELLS, HNRNPAB, ZFP57, GMNN, RBL1, SUV39H1, BRCA2, CENPF, RBBP7, PKIA, MXD3, BRCA1, CTNNBIP1, DLX2, DLX1, PA2G4, TIMELESS, ID2, DNMT1, ID3	638	430	13588	1.4363636363636363	1.0	0.5881426221328795	58.73862990853467
GOTERM_BP_FAT	GO:0009890~negative regulation of biosynthetic process	29	3.30672748004561	0.05430154141298427	CLSPN, JDP2, CAV1, TIPIN, HAT1, CDT1, CITED2, AHRR, MYC, HELLS, HNRNPAB, ZFP57, GMNN, RBL1, SUV39H1, BRCA2, CENPF, RBBP7, PKIA, MXD3, BRCA1, CTNNBIP1, DLX2, DLX1, PA2G4, TIMELESS, ID2, DNMT1, ID3	638	434	13588	1.4231252618349393	1.0	0.6018869077680451	62.289944151415135
GOTERM_BP_FAT	GO:0034621~cellular macromolecular complex subunit organization	28	3.192702394526796	3.24479302073534E-5	TUBB2B, TUBB2A, H1FX, HJURP, CENPA, H2AFZ, TUBB5, TUBB6, FBXO5, H2AFX, LSM2, GEMIN6, ASF1B, TUBA1B, KPNB1, GM8203, HELLS, GM5620, 1110034A24RIK, KIF18A, EVL, MCM2, GM14150, GM3226, TTF2, CENPH, TPPP, H2AFY3, IPO5, H2AFY2, GM11223, CELF2, STMN1	638	245	13588	2.434034930586655	0.07170370254389935	0.001689578123679536	0.056663654140798325
GOTERM_BP_FAT	GO:0044271~nitrogen compound biosynthetic process	27	3.0786773090079818	0.0020973454217113417	ADCY3, ALDH18A1, SRM, CTPS, ASNS, CAD, PSPH, ADA, MTHFD1, TYMS, ATIC, CPOX, GM15210, DDAH1, IMPDH2, DCTD, GM7901, NME6, APRT, GM5566, PYCR1, NME2, CTH, UMPS, DHFR, RRM2, GM12337, RRM1, PHGDH, PSAT1	638	302	13588	1.904108451493699	0.9918868039850836	0.0673935079638881	3.600974605426688
GOTERM_BP_FAT	GO:0010558~negative regulation of macromolecule biosynthetic process	27	3.0786773090079818	0.08647640633327888	CLSPN, JDP2, TIPIN, HAT1, CDT1, CITED2, AHRR, MYC, HELLS, HNRNPAB, ZFP57, GMNN, RBL1, SUV39H1, BRCA2, CENPF, RBBP7, PKIA, MXD3, CTNNBIP1, DLX2, DLX1, PA2G4, TIMELESS, ID2, DNMT1, ID3	638	418	13588	1.3756955797873138	1.0	0.7376349430047078	79.39996081331387
GOTERM_BP_FAT	GO:0000226~microtubule cytoskeleton organization	25	2.8506271379703536	2.37944155414771E-10	HAUS4, CCDC99, HAUS5, HAUS1, SPC25, SAC3D1, NPM1, TUBB5, FBXO5, RANBP1, TUBA1B, KIF11, GM5620, CEP192, NUF2, KIF18A, TPX2, NUSAP1, BIRC5, NDC80, CENPE, ESPL1, TACC3, GM14150, GM3226, BRCA1, TPPP, GM11223, STMN1	638	111	13588	4.796803072665142	5.456056928476727E-7	2.4800265174818037E-8	4.156316069092725E-7
GOTERM_BP_FAT	GO:0030029~actin filament-based process	25	2.8506271379703536	2.4204381755878373E-6	RHOJ, DLC1, PDGFB, NUAK2, ACTG-PS1, FHDC1, RHOU, SRF, ACTG1, GM5915, GM8399, SORBS1, PALM2, CNN2, CNN1, GM12715, PRKCI, TMSB10, EVL, CSRP1, RACGAP1, FLNC, SIRPA, CORO1C, EPB4.1L3, LIMCH1, DBN1, GM9844, DIAP3	638	176	13588	3.025256483328584	0.005534698260704407	1.6816984130163526E-4	0.004227843902437911
GOTERM_BP_FAT	GO:0007126~meiosis	24	2.7366020524515395	9.00287123475619E-12	ADCY3, GM3833, NEK2, MRE11A, GM15452, PTTG1, RPA1, PSMC3IP, PMS2, MNS1, FBXO5, H2AFX, FANCA, LFNG, TRIP13, EXO1, MKI67, SGOL2, SGOL1, BRCA2, TOPBP1, ESPL1, RAD51, FANCD2, CKS2	638	88	13588	5.808492447990881	2.064367132792455E-8	1.1468705984896133E-9	1.572593166798697E-8
GOTERM_BP_FAT	GO:0051327~M phase of meiotic cell cycle	24	2.7366020524515395	9.00287123475619E-12	ADCY3, GM3833, NEK2, MRE11A, GM15452, PTTG1, RPA1, PSMC3IP, PMS2, MNS1, FBXO5, H2AFX, FANCA, LFNG, TRIP13, EXO1, MKI67, SGOL2, SGOL1, BRCA2, TOPBP1, ESPL1, RAD51, FANCD2, CKS2	638	88	13588	5.808492447990881	2.064367132792455E-8	1.1468705984896133E-9	1.572593166798697E-8
GOTERM_BP_FAT	GO:0051321~meiotic cell cycle	24	2.7366020524515395	1.4925316295946183E-11	ADCY3, GM3833, NEK2, MRE11A, GM15452, PTTG1, RPA1, PSMC3IP, PMS2, MNS1, FBXO5, H2AFX, FANCA, LFNG, TRIP13, EXO1, MKI67, SGOL2, SGOL1, BRCA2, TOPBP1, ESPL1, RAD51, FANCD2, CKS2	638	90	13588	5.679414838035528	3.422367389482872E-8	1.6296988203379215E-9	2.6070912095832455E-8
GOTERM_BP_FAT	GO:0030036~actin cytoskeleton organization	23	2.6225769669327255	9.139623478806637E-6	RHOJ, DLC1, NUAK2, PDGFB, ACTG-PS1, FHDC1, RHOU, SRF, ACTG1, SORBS1, GM8399, PALM2, CNN2, CNN1, GM12715, PRKCI, EVL, TMSB10, CSRP1, RACGAP1, SIRPA, CORO1C, EPB4.1L3, LIMCH1, DIAP3, DBN1, GM9844	638	165	13588	2.968785028973117	0.02073917528283309	5.513545904752837E-4	0.015963540850927327
GOTERM_BP_FAT	GO:0034622~cellular macromolecular complex assembly	23	2.6225769669327255	5.549833029459092E-4	TUBB2B, TUBB2A, H1FX, CENPA, HJURP, TUBB5, H2AFZ, TUBB6, FBXO5, H2AFX, LSM2, GEMIN6, ASF1B, KPNB1, TUBA1B, GM8203, HELLS, GM5620, 1110034A24RIK, MCM2, GM14150, GM3226, TPPP, H2AFY3, H2AFY2, IPO5, CELF2	638	217	13588	2.257371104979559	0.7199900032515578	0.022084589288597578	0.9650062019096795
GOTERM_BP_FAT	GO:0051253~negative regulation of RNA metabolic process	21	2.394526795895097	0.09258389916660366	JDP2, ZFP57, RBL1, SUV39H1, HAT1, RBBP7, PKIA, CITED2, CTNNBIP1, DLX2, DLX1, AHRR, PA2G4, ID2, TIMELESS, NPM1, DNMT1, ID3, MYC, HELLS, HNRNPAB	638	310	13588	1.4427545757912832	1.0	0.7536735350472462	81.67770532402388
GOTERM_BP_FAT	GO:0006310~DNA recombination	20	2.280501710376283	1.0469704551345132E-9	EXO1, RECQL4, GM3833, XRCC2, RAD51AP1, BLM, UNG, LIG1, EME1, SMC6, BRCA2, TOPBP1, RAD54L, RAD51, RPA1, PSMC3IP, PMS2, RAD54B, H2AFX, TRIP13	638	75	13588	5.679414838035528	2.4007004996162706E-6	1.0002930250774256E-7	1.8288077385797408E-6
GOTERM_BP_FAT	GO:0006323~DNA packaging	20	2.280501710376283	1.8932462444351076E-7	SUV39H1, NUSAP1, H1FX, MCM2, SMC2, NCAPD3, NCAPD2, SMC4, NCAPH, HJURP, NCAPG2, CENPA, H2AFY3, H2AFY2, H2AFZ, H2AFX, ASF1B, GM8203, TOP2A, CDCA5, HELLS	638	101	13588	4.217387255966975	4.3402718783236427E-4	1.607844129214442E-5	3.307044449840646E-4
GOTERM_BP_FAT	GO:0008283~cell proliferation	20	2.280501710376283	0.02367138019589156	BMP4, GINS1, MKI67, PDGFB, FST, E2F8, POLA1, BRCA2, RACGAP1, TACC3, GM13841, CXCL12, GM5648, RPL29, CCND1, UHRF1, MCM7, NCAPG2, GM15210, SCARB1, IMPDH2, ASPM, HELLS	638	247	13588	1.7245186755168604	1.0	0.4015282060904125	34.193727708924925
GOTERM_BP_FAT	GO:0033043~regulation of organelle organization	19	2.1664766248574687	3.189898204588258E-4	RECQL4, FAM33A, CAV1, CEP192, NUSAP1, EVL, CENPE, TMSB10, NEXN, MID1, PLK4, MAD2L1, S1PR1, NPM1, F630043A04RIK, GM11223, RANBP1, SKA1, STMN1, GM9844, NEK6	638	154	13588	2.627651345519684	0.5188423676919252	0.01321302848523398	0.5557380500530229
GOTERM_BP_FAT	GO:0043066~negative regulation of apoptosis	19	2.1664766248574687	0.032153531893420836	STIL, XRCC2, NUAK2, SKP2, CENPF, COL2A1, BIRC5, GDNF, ADA, TIMP1, CITED2, GM5566, MSX2, DLX1, NME2, FAS, MYC, HELLS, NGF, BARD1	638	239	13588	1.6931309925105915	1.0	0.4758771936551083	43.49682163158517
GOTERM_BP_FAT	GO:0043069~negative regulation of programmed cell death	19	2.1664766248574687	0.03853377833089873	STIL, XRCC2, NUAK2, SKP2, CENPF, COL2A1, BIRC5, GDNF, ADA, TIMP1, CITED2, GM5566, MSX2, DLX1, NME2, FAS, MYC, HELLS, NGF, BARD1	638	244	13588	1.6584356852870137	1.0	0.519325048082292	49.661736386185375
GOTERM_BP_FAT	GO:0060548~negative regulation of cell death	19	2.1664766248574687	0.039612388662821324	STIL, XRCC2, NUAK2, SKP2, CENPF, COL2A1, BIRC5, GDNF, ADA, TIMP1, CITED2, GM5566, MSX2, DLX1, NME2, FAS, MYC, HELLS, NGF, BARD1	638	245	13588	1.6516665600409441	1.0	0.520757795100564	50.63909845877386
GOTERM_BP_FAT	GO:0006397~mRNA processing	19	2.1664766248574687	0.06662966161107892	LSM6, SNRPD1, LSM5, MAGOHB, LSM4, LSM2, GM7846, GEMIN6, SNRPA1, GM5461, GM5643, GM8396, HNRNPA1, TTF2, GM14277, SLBP, DDX39, GM13092, GM8186, CELF2, GM7879, SNRNP40, THOC4, SNRPF, SNRPE, GM12571, SNRPG	638	262	13588	1.5444973557634785	1.0	0.6639220050527286	70.01426308922444
GOTERM_BP_FAT	GO:0006261~DNA-dependent DNA replication	18	2.0524515393386547	2.2882619319831598E-14	POLA1, TIPIN, BRCA2, MCM2, MCM3, MCM4, MCM5, RAD51, MCM6, PRIM1, CCNE2, DNA2, CCNE1, CDC45, MCM7, POLE2, POLD1, PRIM2	638	34	13588	11.275308869629358	5.244227274658897E-11	3.08486569622346E-12	3.994582442601313E-11
GOTERM_BP_FAT	GO:0008380~RNA splicing	18	2.0524515393386547	0.013624313167991002	LSM6, SNRPD1, LSM5, MAGOHB, LSM4, LSM2, GM7846, GEMIN6, SNRPA1, GM5461, GM5643, HNRNPA1, TTF2, GM14277, DDX39, GM13092, GM8186, CELF2, SNRNP40, GM7879, THOC4, SNRPF, SNRPE, GM12571, SNRPG	638	201	13588	1.9072661769522297	0.9999999999999781	0.27695342125626643	21.307341301975903
GOTERM_BP_FAT	GO:0006461~protein complex assembly	18	2.0524515393386547	0.038567316392437254	CAV1, TUBB2B, GM5620, TUBB2A, 1110034A24RIK, PDSS1, GM14150, GM3226, RRM2, TPPP, IPO5, RRM1, NPM1, TUBB5, FBXO5, TUBB6, FAS, MYC, KPNB1, TUBA1B, DCTPP1	638	227	13588	1.6888127822352341	1.0	0.5167887205423143	49.69239913120313
GOTERM_BP_FAT	GO:0070271~protein complex biogenesis	18	2.0524515393386547	0.038567316392437254	CAV1, TUBB2B, GM5620, TUBB2A, 1110034A24RIK, PDSS1, GM14150, GM3226, RRM2, TPPP, IPO5, RRM1, NPM1, TUBB5, FBXO5, TUBB6, FAS, MYC, KPNB1, TUBA1B, DCTPP1	638	227	13588	1.6888127822352341	1.0	0.5167887205423143	49.69239913120313
GOTERM_BP_FAT	GO:0010564~regulation of cell cycle process	17	1.9384264538198404	1.9612655526522756E-7	RECQL4, CEP192, DBF4, TIPIN, CENPF, NUSAP1, BRCA2, CENPE, BIRC5, PKIA, CDT1, PLK4, MAD2L1, NPM1, FBXO5, RANBP1, NEK6	638	73	13588	4.959762957873491	4.4961712712887625E-4	1.6061236560394043E-5	3.425857579619773E-4
GOTERM_BP_FAT	GO:0007346~regulation of mitotic cell cycle	17	1.9384264538198404	9.025080907116272E-6	CDK1, CEP192, DBF4, CENPF, NUSAP1, BRCA2, CENPE, BIRC5, PKIA, CDT1, CCND1, MAD2L1, FBXO5, RANBP1, ZWILCH, MYC, NEK6	638	96	13588	3.771486415882968	0.020481940114162933	5.591572323633276E-4	0.01576349222192075
GOTERM_BP_FAT	GO:0007018~microtubule-based movement	17	1.9384264538198404	1.7527795942508893E-5	KIF23, KIF22, KIFC1, KIF11, TUBB2B, GM5620, TUBB2A, KIF15, KIF18A, KIF18B, CENPE, GM14150, GM3226, KIF2C, KIF4, TUBB5, KIF20B, TUBB6, TUBA1B, KIF20A	638	101	13588	3.5847791675719294	0.03939461926170951	9.798023221839758E-4	0.03061246047831867
GOTERM_BP_FAT	GO:0034654~nucleobase, nucleoside, nucleotide and nucleic acid biosynthetic process	17	1.9384264538198404	0.010045963129288132	ADCY3, DCTD, CTPS, CAD, ADA, APRT, NME6, MTHFD1, GM5566, TYMS, NME2, UMPS, DHFR, ATIC, RRM2, GM15210, RRM1, GM12337, IMPDH2	638	179	13588	2.022696625278016	0.9999999999118412	0.2246310284027625	16.168922143951658
GOTERM_BP_FAT	GO:0034404~nucleobase, nucleoside and nucleotide biosynthetic process	17	1.9384264538198404	0.010045963129288132	ADCY3, DCTD, CTPS, CAD, ADA, APRT, NME6, MTHFD1, GM5566, TYMS, NME2, UMPS, DHFR, ATIC, RRM2, GM15210, RRM1, GM12337, IMPDH2	638	179	13588	2.022696625278016	0.9999999999118412	0.2246310284027625	16.168922143951658
GOTERM_BP_FAT	GO:0007507~heart development	17	1.9384264538198404	0.0601323281047826	DLC1, BMP4, STIL, CENPF, COL2A1, SRF, TPM1, GJC1, CITED2, VCAM1, MSX2, OSR1, ID2, ADAMTS1, ADAM19, ID3, COL11A1	638	223	13588	1.6235995332949096	1.0	0.6300647947059128	66.15147915279549
GOTERM_BP_FAT	GO:0022613~ribonucleoprotein complex biogenesis	16	1.8244013683010263	0.0019052354753497055	EXOSC8, GAR1, LSM6, EXOSC2, FBL, MRTO4, DIS3, EBNA1BP2, PA2G4, NPM3-PS1, NPM1, NOP58, CELF2, LSM2, GEMIN6, NHP2, GM12571	638	137	13588	2.4873349655630044	0.9873850409670653	0.06410841342430706	3.276293909461292
GOTERM_BP_FAT	GO:0051493~regulation of cytoskeleton organization	15	1.7103762827822122	2.037943909274894E-4	FAM33A, CAV1, CEP192, EVL, CENPE, TMSB10, NEXN, MID1, PLK4, S1PR1, NPM1, F630043A04RIK, GM11223, RANBP1, SKA1, STMN1, GM9844	638	99	13588	3.226940248883823	0.3733381270987872	0.008947198105165088	0.355383482300653
GOTERM_BP_FAT	GO:0009165~nucleotide biosynthetic process	15	1.7103762827822122	0.03438338590525692	DCTD, ADCY3, CTPS, ADA, NME6, MTHFD1, GM5566, TYMS, NME2, UMPS, DHFR, ATIC, RRM2, GM15210, GM12337, RRM1, IMPDH2	638	174	13588	1.8360177278132093	1.0	0.49626900664425877	45.72811969471046
GOTERM_BP_FAT	GO:0045596~negative regulation of cell differentiation	15	1.7103762827822122	0.04726833716489938	BMP4, CAV1, HMGB3, EZH2, FST, EPHB2, DLX2, DLX1, CCND1, RIF1, HLX, SEMA3A, TGFB1I1, CIT, ASPM	638	182	13588	1.7553136518653762	1.0	0.5743293429789686	57.07932739759318
GOTERM_BP_FAT	GO:0051130~positive regulation of cellular component organization	14	1.596351197263398	0.004698396061600576	CAV1, PRKCI, NUSAP1, CENPE, SRF, SIRPA, AHR, PLK4, SORBS1, TPPP, NPM1, RANBP1, PTX3, NGF	638	122	13588	2.4440104835808625	0.9999795762195146	0.1292899842183317	7.897046662422924
GOTERM_BP_FAT	GO:0007051~spindle organization	13	1.4823261117445838	1.5507843647003863E-9	HAUS4, HAUS5, HAUS1, TPX2, NDC80, ESPL1, TACC3, SPC25, SAC3D1, GM11223, TUBB5, FBXO5, RANBP1, STMN1	638	28	13588	9.888266905508285	3.5559422861819456E-6	1.3676724486266778E-7	2.708850399546492E-6
GOTERM_BP_FAT	GO:0032886~regulation of microtubule-based process	13	1.4823261117445838	7.034631868839927E-7	FAM33A, CAV1, CEP192, CENPF, CENPE, MID1, TACC3, PLK4, NPM1, F630043A04RIK, GM11223, RANBP1, STMN1, SKA1	638	45	13588	6.152699407871821	0.0016117414024987564	5.20322480489499E-5	0.0012287752778172845
GOTERM_BP_FAT	GO:0000075~cell cycle checkpoint	13	1.4823261117445838	3.7341872110740176E-6	CLSPN, CDK1, CEP192, TIPIN, CENPE, CHEK1, BIRC5, CDT1, CCND1, MAD2L1, B230120H23RIK, H2AFX, ZWILCH	638	52	13588	5.324451410658307	0.008525953402087061	2.5180674024483096E-4	0.0065225338188756865
GOTERM_BP_FAT	GO:0042254~ribosome biogenesis	13	1.4823261117445838	0.006197254254494027	EXOSC8, GAR1, LSM6, EXOSC2, FBL, MRTO4, DIS3, EBNA1BP2, PA2G4, NPM3-PS1, NPM1, NOP58, NHP2, GM12571	638	112	13588	2.4720667263770713	0.9999993553247974	0.16320945950198906	10.290011848134661
GOTERM_BP_FAT	GO:0051129~negative regulation of cellular component organization	12	1.3683010262257698	0.004083829939541039	RECQL4, CEP192, EVL, CENPE, TMSB10, MID1, EPHB2, S1PR1, MAD2L1, GM11223, SEMA3A, STMN1, CIT, GM9844	638	93	13588	2.7481039538881586	0.9999158908513845	0.11760187522863297	6.89858708171307
GOTERM_BP_FAT	GO:0006730~one-carbon metabolic process	12	1.3683010262257698	0.02134545970888757	MTHFD1, MTHFD2, SHMT1, RAB3B, SHMT2, DHFR, ZFP57, EZH2, SUV39H1, DNMT1, ALDH1L2, HELLS	638	117	13588	2.184390322321357	1.0	0.37296063837638893	31.40092875713163
GOTERM_BP_FAT	GO:0070507~regulation of microtubule cytoskeleton organization	11	1.2542759407069555	4.011463224254235E-6	FAM33A, PLK4, CAV1, CEP192, GM11223, F630043A04RIK, NPM1, RANBP1, CENPE, STMN1, SKA1, MID1	638	36	13588	6.507662835249042	0.00915612863963533	2.554757944605024E-4	0.007006837988909886
GOTERM_BP_FAT	GO:0051329~interphase of mitotic cell cycle	11	1.2542759407069555	7.47222873116726E-5	CCND1, ANP32B, DBF4, POLA1, SKP2, CENPF, BIRC5, CHEK1, CDCA5, RHOU, TFDP1	638	49	13588	4.781140042223786	0.1574688182959254	0.00371795398021324	0.13044174032101896
GOTERM_BP_FAT	GO:0051325~interphase	11	1.2542759407069555	1.067623310049835E-4	CCND1, ANP32B, DBF4, POLA1, SKP2, CENPF, BIRC5, CHEK1, CDCA5, RHOU, TFDP1	638	51	13588	4.593644354293441	0.2171538529674919	0.005195374009858589	0.18632448263853352
GOTERM_BP_FAT	GO:0032880~regulation of protein localization	11	1.2542759407069555	0.009332746038372534	SGK1, SORBS1, PANX1, CEP192, PRKCI, CENPF, CENPE, TACC3, EDA, PKIA, BARD1	638	90	13588	2.6030651340996167	0.9999999995403118	0.21250175819347206	15.107657819834985
GOTERM_BP_FAT	GO:0030198~extracellular matrix organization	11	1.2542759407069555	0.01989443432727717	FBLN1, FBLN5, COL2A1, NID1, POSTN, LOX, COL11A1, SERPINH1, COL5A2, ABI3BP, CYR61	638	101	13588	2.3195629907818365	1.0	0.36632307105094597	29.602441035866633
GOTERM_BP_FAT	GO:0051270~regulation of cell motion	11	1.2542759407069555	0.028431593963825327	JUB, S1PR1, PDGFB, RRAS2, CSF1, GM11223, SEMA3A, STMN1, UNC5C, NEXN, CXCL12, ADA	638	107	13588	2.189494038027715	1.0	0.4489012196204071	39.578723945352145
GOTERM_BP_FAT	GO:0006333~chromatin assembly or disassembly	11	1.2542759407069555	0.03178179833626854	CENPA, HJURP, H2AFY3, H2AFY2, H2AFZ, SUV39H1, H2AFX, H1FX, MCM2, ASF1B, GM8203, HELLS	638	109	13588	2.1493198354950964	1.0	0.4748073283730687	43.11653962995939
GOTERM_BP_FAT	GO:0001763~morphogenesis of a branching structure	11	1.2542759407069555	0.06889352757230491	BMP4, DLX2, FGF7, PDGFB, TIMELESS, CSF1, CTNND2, SEMA3A, GDNF, CXCL12, SRF	638	125	13588	1.874206896551724	1.0	0.6666328402613497	71.25961965929955
GOTERM_BP_FAT	GO:0006270~DNA replication initiation	10	1.1402508551881414	9.928654577772888E-12	CCNE2, CCNE1, CDC45, MCM7, POLA1, MCM2, MCM3, MCM4, MCM5, MCM6	638	10	13588	21.297805642633225	2.276631050346367E-8	1.198226851073514E-9	1.734291599220228E-8
GOTERM_BP_FAT	GO:0006302~double-strand break repair	10	1.1402508551881414	1.3902655371230755E-4	RPA1, XRCC2, MRE11A, POLA1, BRCA2, RAD54B, H2AFX, RAD54L, RAD51, TRIP13	638	43	13588	4.952978056426332	0.27298636735616366	0.006485207226045286	0.2425684369975145
GOTERM_BP_FAT	GO:0031589~cell-substrate adhesion	10	1.1402508551881414	0.0012363360718483207	DLC1, JUB, SORBS1, EPDR1, CTGF, NID1, NID2, EDA, GM13841, SIRPA, RPL29	638	57	13588	3.7364571302865306	0.9413795996754345	0.044721905529655936	2.137739698550334
GOTERM_BP_FAT	GO:0051052~regulation of DNA metabolic process	10	1.1402508551881414	0.0014038234388868648	CLSPN, DNA2, BLM, USP1, GMNN, PCNA, TIPIN, BRCA2, ID3, CDT1	638	58	13588	3.6720354556264185	0.9600940040891595	0.049845441225031206	2.4240049372599715
GOTERM_BP_FAT	GO:0009309~amine biosynthetic process	10	1.1402508551881414	0.0068798747316872995	MTHFD1, PYCR1, CTH, ALDH18A1, DHFR, SRM, PHGDH, ASNS, PSPH, PSAT1, GM7901	638	73	13588	2.917507622278524	0.9999998666208302	0.1755589459397776	11.36029595482011
GOTERM_BP_FAT	GO:0006364~rRNA processing	10	1.1402508551881414	0.007516511971167735	DIS3, EBNA1BP2, EXOSC8, PA2G4, NPM3-PS1, GAR1, LSM6, EXOSC2, NHP2, GM12571, FBL	638	74	13588	2.8780818435990847	0.9999999693447923	0.1861326575282034	12.347623756497539
GOTERM_BP_FAT	GO:0016072~rRNA metabolic process	10	1.1402508551881414	0.008197146590716523	DIS3, EBNA1BP2, EXOSC8, PA2G4, NPM3-PS1, GAR1, LSM6, EXOSC2, NHP2, GM12571, FBL	638	75	13588	2.839707419017764	0.9999999936417824	0.19501930689519953	13.391712662247057
GOTERM_BP_FAT	GO:0031497~chromatin assembly	10	1.1402508551881414	0.008197146590716523	CENPA, HJURP, H2AFY3, H2AFY2, H2AFZ, H2AFX, H1FX, MCM2, ASF1B, GM8203, HELLS	638	75	13588	2.839707419017764	0.9999999936417824	0.19501930689519953	13.391712662247057
GOTERM_BP_FAT	GO:0065004~protein-DNA complex assembly	10	1.1402508551881414	0.008923642447831257	CENPA, HJURP, H2AFY3, H2AFY2, H2AFZ, H2AFX, H1FX, MCM2, ASF1B, GM8203, HELLS	638	76	13588	2.802342847714898	0.9999999988152763	0.20829419363269808	14.49321010722917
GOTERM_BP_FAT	GO:0030334~regulation of cell migration	10	1.1402508551881414	0.028290158778442237	JUB, S1PR1, PDGFB, RRAS2, CSF1, SEMA3A, UNC5C, NEXN, CXCL12, ADA	638	92	13588	2.3149788741992636	1.0	0.4502125952227738	39.4248984878805
GOTERM_BP_FAT	GO:0022604~regulation of cell morphogenesis	10	1.1402508551881414	0.03799376522615459	RHOJ, FGD1, CDC42EP2, PALM2, SEMA3A, CIT, RHOU, CDC42EP3, NGF, EPHB2	638	97	13588	2.195650066250848	1.0	0.5171335826139564	49.16558786779417
GOTERM_BP_FAT	GO:0043623~cellular protein complex assembly	10	1.1402508551881414	0.06673764120971172	GM5620, TUBB2B, TUBB2A, 1110034A24RIK, GM14150, GM3226, TPPP, IPO5, TUBB5, TUBB6, FBXO5, TUBA1B, KPNB1	638	108	13588	1.9720190409845582	1.0	0.6620172704381876	70.07480029998393
GOTERM_BP_FAT	GO:0040012~regulation of locomotion	10	1.1402508551881414	0.07312069660552771	JUB, S1PR1, PDGFB, RRAS2, CSF1, SEMA3A, UNC5C, NEXN, CXCL12, ADA	638	110	13588	1.9361641493302932	1.0	0.6867475923558161	73.45555220552352
GOTERM_BP_FAT	GO:0000070~mitotic sister chromatid segregation	9	1.0262257696693273	6.433849196012253E-7	CCDC99, MAD2L1, NEK2, KIF18A, NUSAP1, CIT, CDCA5, NCAPD3, SMC4	638	18	13588	10.648902821316614	0.0014741944014659003	4.917486071509547E-5	0.001123834038585514
GOTERM_BP_FAT	GO:0000819~sister chromatid segregation	9	1.0262257696693273	1.0657705880752954E-6	CCDC99, MAD2L1, NEK2, KIF18A, NUSAP1, CIT, CDCA5, NCAPD3, SMC4	638	19	13588	10.088434251773634	0.0024408295802089697	7.636624835027916E-5	0.0018616306696972451
GOTERM_BP_FAT	GO:0030261~chromosome condensation	9	1.0262257696693273	3.977739146208318E-6	NCAPH, NCAPG2, NUSAP1, SMC2, CDCA5, TOP2A, NCAPD3, NCAPD2, SMC4	638	22	13588	8.71273867198632	0.009079504096996649	2.6056530418083756E-4	0.006947933943413087
GOTERM_BP_FAT	GO:0000910~cytokinesis	9	1.0262257696693273	2.2419075320551557E-5	PRC1, INCENP, BRCA2, NUSAP1, BIRC5, ANLN, AURKB, RACGAP1, CIT	638	27	13588	7.09926854754441	0.05010850430321212	0.0012232397070270906	0.039153549088266626
GOTERM_BP_FAT	GO:0008652~cellular amino acid biosynthetic process	9	1.0262257696693273	8.848914517957206E-4	MTHFD1, PYCR1, CTH, ALDH18A1, DHFR, PHGDH, ASNS, PSPH, PSAT1, GM7901	638	44	13588	4.35636933599316	0.8686584866792538	0.03382084990063783	1.5344835478721786
GOTERM_BP_FAT	GO:0007160~cell-matrix adhesion	9	1.0262257696693273	0.002094286464348216	DLC1, JUB, SORBS1, EPDR1, CTGF, NID1, NID2, EDA, SIRPA	638	50	13588	3.8336050156739816	0.9918295760852613	0.06825361905191352	3.595812790183317
GOTERM_BP_FAT	GO:0051640~organelle localization	9	1.0262257696693273	0.0034448690639858476	CCDC99, NPM1, KIF18A, CENPF, NUSAP1, BIRC5, TACC3, CDCA5, ASPM	638	54	13588	3.549634273772205	0.999633943090975	0.10407530308423851	5.849679762862547
GOTERM_BP_FAT	GO:0010639~negative regulation of organelle organization	9	1.0262257696693273	0.008075750745637248	RECQL4, MAD2L1, S1PR1, CEP192, GM11223, TMSB10, CENPE, EVL, STMN1, MID1, GM9844	638	62	13588	3.0916169481241784	0.9999999915818322	0.19442277186824708	13.20635554446985
GOTERM_BP_FAT	GO:0070201~regulation of establishment of protein localization	9	1.0262257696693273	0.017640502857714895	SORBS1, PANX1, CEP192, PRKCI, CENPF, TACC3, EDA, PKIA, BARD1	638	71	13588	2.6997218420239304	1.0	0.33509227978716727	26.720387257363008
GOTERM_BP_FAT	GO:0006334~nucleosome assembly	9	1.0262257696693273	0.020558972172258216	CENPA, HJURP, H2AFY3, H2AFY2, H2AFZ, H2AFX, H1FX, MCM2, ASF1B, GM8203	638	73	13588	2.625756860050672	1.0	0.3674589819627869	30.43155689853332
GOTERM_BP_FAT	GO:0034728~nucleosome organization	9	1.0262257696693273	0.025555390303252778	CENPA, HJURP, H2AFY3, H2AFY2, H2AFZ, H2AFX, H1FX, MCM2, ASF1B, GM8203	638	76	13588	2.5221085629434086	1.0	0.4228379074729006	36.376968320840966
GOTERM_BP_FAT	GO:0051789~response to protein stimulus	9	1.0262257696693273	0.05097739704001461	MSX2, CCND1, ID2, CASP12, CREB3L1, ID3, FAS, VARS, CYR61	638	87	13588	2.2032212733758514	1.0	0.5834447820218986	59.906346086890295
GOTERM_BP_FAT	GO:0006275~regulation of DNA replication	8	0.9122006841505131	9.741438126376777E-6	CLSPN, DNA2, GMNN, PCNA, TIPIN, BRCA2, ID3, CDT1	638	18	13588	9.465691396725878	0.022089597786117854	5.725854058187263E-4	0.017014604078402495
GOTERM_BP_FAT	GO:0007127~meiosis I	8	0.9122006841505131	0.0010268478084650532	FANCD2, GM15452, CKS2, FBXO5, TOPBP1, ESPL1, PTTG1, RAD51, TRIP13	638	35	13588	4.86806986117331	0.9051796984653393	0.038502065688236664	1.778573043932552
GOTERM_BP_FAT	GO:0032583~regulation of gene-specific transcription	8	0.9122006841505131	0.03681803283397523	DLX2, DLX1, HMGB2, AHRR, TIMELESS, GM13237, MYC, HNRNPAB, CITED2	638	67	13588	2.543021569269639	1.0	0.5116922818812039	48.06936743418194
GOTERM_BP_FAT	GO:0040029~regulation of gene expression, epigenetic	8	0.9122006841505131	0.04509181919519458	ZFP57, RBM3, H2AFY2, SUV39H1, GM15453, DNMT1, HAT1, BRCA1, HELLS	638	70	13588	2.434034930586655	1.0	0.5624465616804457	55.333986492860475
GOTERM_BP_FAT	GO:0003007~heart morphogenesis	8	0.9122006841505131	0.05785123415813538	DLC1, MSX2, STIL, COL2A1, ADAMTS1, COL11A1, TPM1, SRF	638	74	13588	2.3024654748792677	1.0	0.6179815513166329	64.68744765852665
GOTERM_BP_FAT	GO:0000725~recombinational repair	7	0.798175598631699	1.3409552869634637E-5	RPA1, XRCC2, BRCA2, RAD54B, H2AFX, RAD54L, RAD51	638	13	13588	11.468049192187124	0.030280389771465077	7.684123921507524E-4	0.023420704345200605
GOTERM_BP_FAT	GO:0000724~double-strand break repair via homologous recombination	7	0.798175598631699	1.3409552869634637E-5	RPA1, XRCC2, BRCA2, RAD54B, H2AFX, RAD54L, RAD51	638	13	13588	11.468049192187124	0.030280389771465077	7.684123921507524E-4	0.023420704345200605
GOTERM_BP_FAT	GO:0051225~spindle assembly	7	0.798175598631699	3.607673425372816E-5	HAUS4, HAUS5, SAC3D1, HAUS1, TPX2, TUBB5, FBXO5	638	15	13588	9.938975966562174	0.07939613005256152	0.0018366544795567208	0.06299873381456766
GOTERM_BP_FAT	GO:0051297~centrosome organization	7	0.798175598631699	1.185768395326904E-4	HAUS4, KIF11, HAUS5, SAC3D1, NPM1, HAUS1, BRCA1	638	18	13588	8.282479972135144	0.23807931348267364	0.005648835295825494	0.20692335426271136
GOTERM_BP_FAT	GO:0006284~base-excision repair	7	0.798175598631699	1.6647280662064726E-4	DNA2, HMGB2, NEIL3, GM13237, UNG, POLD1, PCNA, PARP1	638	19	13588	7.846559973601716	0.31733697930659743	0.00745742540677552	0.2903900424468753
GOTERM_BP_FAT	GO:0031023~microtubule organizing center organization	7	0.798175598631699	3.0724699665911614E-4	HAUS4, KIF11, HAUS5, SAC3D1, NPM1, HAUS1, BRCA1	638	21	13588	7.09926854754441	0.5057064047351439	0.012963858328376543	0.5353316478936887
GOTERM_BP_FAT	GO:0009069~serine family amino acid metabolic process	7	0.798175598631699	4.058558230662324E-4	SHMT1, CTH, SHMT2, DHFR, PHGDH, PSPH, PSAT1, GM7901	638	22	13588	6.776574522656027	0.6057682338536532	0.016484341134704872	0.7065691970101318
GOTERM_BP_FAT	GO:0031570~DNA integrity checkpoint	7	0.798175598631699	0.0038853813941436004	CDK1, CLSPN, CCND1, TIPIN, H2AFX, CHEK1, CDT1	638	33	13588	4.517716348437352	0.9998671821981161	0.1136370964817317	6.574002637457266
GOTERM_BP_FAT	GO:0051656~establishment of organelle localization	7	0.798175598631699	0.004534626447502611	CCDC99, NPM1, KIF18A, CENPF, NUSAP1, BIRC5, CDCA5	638	34	13588	4.384842338189195	0.9999702161795594	0.12658524428677276	7.631968304415659
GOTERM_BP_FAT	GO:0051258~protein polymerization	7	0.798175598631699	0.010211854420358608	TUBB2B, GM5620, TUBB2A, TPPP, TUBB5, FBXO5, TUBB6, TUBA1B, GM14150, GM3226	638	40	13588	3.727115987460815	0.9999999999399691	0.2257247469760023	16.4139684081404
GOTERM_BP_FAT	GO:0010551~regulation of specific transcription from RNA polymerase II promoter	7	0.798175598631699	0.031161398634760765	DLX2, DLX1, HMGB2, AHRR, TIMELESS, GM13237, MYC, CITED2	638	51	13588	2.9232282254594626	1.0	0.4709936783171068	42.476494227649596
GOTERM_BP_FAT	GO:0001824~blastocyst development	7	0.798175598631699	0.03977977191626757	GINS1, NCAPG2, BRCA2, CAPN2, SRF, ADA, CITED2	638	54	13588	2.7608266573783817	1.0	0.519488677413795	50.789156413998526
GOTERM_BP_FAT	GO:0009116~nucleoside metabolic process	7	0.798175598631699	0.046287685497656494	GM5566, UMPS, NME2, MTAP, ADA, APRT, DUT, NME6	638	56	13588	2.6622257053291536	1.0	0.5693344580626648	56.30105985663118
GOTERM_BP_FAT	GO:0007015~actin filament organization	7	0.798175598631699	0.046287685497656494	SORBS1, PALM2, PRKCI, EVL, DBN1, SIRPA, SRF	638	56	13588	2.6622257053291536	1.0	0.5693344580626648	56.30105985663118
GOTERM_BP_FAT	GO:0042770~DNA damage response, signal transduction	7	0.798175598631699	0.04977503961468217	CDK1, CCND1, TIPIN, BRCA2, H2AFX, CHEK1, BRCA1	638	57	13588	2.6155199912005718	1.0	0.5825857548243424	59.009737924395566
GOTERM_BP_FAT	GO:0051170~nuclear import	7	0.798175598631699	0.053419450857335835	GM5643, GM5461, RAN, GM10184, POLA2, RPL38, HNRNPA1, IPO5, GM10259, NOP58, GM8129, KPNB1, KPNA2	638	58	13588	2.570424818938493	1.0	0.5983611945992475	61.67080269823657
GOTERM_BP_FAT	GO:0009123~nucleoside monophosphate metabolic process	7	0.798175598631699	0.057221675285745954	ADCY3, TYMS, ATIC, GM15210, PDE5A, BC048355, IMPDH2, ADA	638	59	13588	2.5268582965836037	1.0	0.6164356702245113	64.27299902815842
GOTERM_BP_FAT	GO:0050658~RNA transport	7	0.798175598631699	0.08826359640003811	TMEM48, GM5461, GM5643, NPM1, MAGOHB, THOC4, NUP37, NUP85, HNRNPA1	638	66	13588	2.258858174218676	1.0	0.7428834131720725	80.09270214432559
GOTERM_BP_FAT	GO:0050657~nucleic acid transport	7	0.798175598631699	0.08826359640003811	TMEM48, GM5461, GM5643, NPM1, MAGOHB, THOC4, NUP37, NUP85, HNRNPA1	638	66	13588	2.258858174218676	1.0	0.7428834131720725	80.09270214432559
GOTERM_BP_FAT	GO:0051236~establishment of RNA localization	7	0.798175598631699	0.08826359640003811	TMEM48, GM5461, GM5643, NPM1, MAGOHB, THOC4, NUP37, NUP85, HNRNPA1	638	66	13588	2.258858174218676	1.0	0.7428834131720725	80.09270214432559
GOTERM_BP_FAT	GO:0006403~RNA localization	7	0.798175598631699	0.09332381576684956	TMEM48, GM5461, GM5643, NPM1, MAGOHB, THOC4, NUP37, NUP85, HNRNPA1	638	67	13588	2.2251438731109343	1.0	0.7543951384799241	81.93693004012891
GOTERM_BP_FAT	GO:0051053~negative regulation of DNA metabolic process	6	0.6841505131128849	0.0019200570604672581	CLSPN, BLM, GMNN, TIPIN, BRCA2, CDT1	638	20	13588	6.389341692789968	0.9878073621781083	0.0636584541493177	3.301380191934866
GOTERM_BP_FAT	GO:0009262~deoxyribonucleotide metabolic process	6	0.6841505131128849	0.0037093492068682402	TYMS, RRM2, RRM1, BC048355, ADA, DUT	638	23	13588	5.555949298078234	0.999800830005667	0.11017534038070942	6.285190018954734
GOTERM_BP_FAT	GO:0007093~mitotic cell cycle checkpoint	6	0.6841505131128849	0.004507658457697033	CDK1, CCND1, MAD2L1, CEP192, CENPE, ZWILCH	638	24	13588	5.324451410658308	0.9999683073828968	0.12742637752909303	7.588248864604019
GOTERM_BP_FAT	GO:0006220~pyrimidine nucleotide metabolic process	6	0.6841505131128849	0.007625659434232372	GM5566, TYMS, UMPS, NME2, CTPS, DUT, NME6	638	27	13588	4.73284569836294	0.9999999761777953	0.18657515221578447	12.515850269964835
GOTERM_BP_FAT	GO:0031110~regulation of microtubule polymerization or depolymerization	6	0.6841505131128849	0.008932919475004754	FAM33A, CAV1, GM11223, F630043A04RIK, STMN1, SKA1, MID1	638	28	13588	4.563815494849978	0.9999999988404341	0.20640517920789692	14.507189955194056
GOTERM_BP_FAT	GO:0045787~positive regulation of cell cycle	6	0.6841505131128849	0.02009915012940811	BRCA2, CENPF, NUSAP1, CENPE, BIRC5, CITED2	638	34	13588	3.7584362898764527	1.0	0.36365083881750726	29.858843962421112
GOTERM_BP_FAT	GO:0045786~negative regulation of cell cycle	6	0.6841505131128849	0.04944587806873019	MAD2L1, CEP192, GMNN, DBC1, CENPE, RUNX3	638	43	13588	2.9717868338558	1.0	0.5855890903602687	58.76100337712262
GOTERM_BP_FAT	GO:0009064~glutamine family amino acid metabolic process	6	0.6841505131128849	0.04944587806873019	PYCR1, ALDH18A1, CTPS, PHGDH, ASNS, CAD, GM7901	638	43	13588	2.9717868338558	1.0	0.5855890903602687	58.76100337712262
GOTERM_BP_FAT	GO:0008360~regulation of cell shape	6	0.6841505131128849	0.06782036732494465	RHOJ, FGD1, CDC42EP2, PALM2, RHOU, CDC42EP3	638	47	13588	2.71886880544254	1.0	0.6631395420934398	70.67547860720393
GOTERM_BP_FAT	GO:0010638~positive regulation of organelle organization	6	0.6841505131128849	0.09539790868723531	PLK4, CAV1, NPM1, NUSAP1, RANBP1, CENPE	638	52	13588	2.4574391126115267	1.0	0.7601947519666896	82.64526800315062
GOTERM_BP_FAT	GO:0006563~L-serine metabolic process	5	0.5701254275940707	1.4951229240949872E-4	SHMT1, SHMT2, PHGDH, PSPH, PSAT1, GM7901	638	7	13588	15.21271831616659	0.2902605284927462	0.006833689774126239	0.2608410550827056
GOTERM_BP_FAT	GO:0009070~serine family amino acid biosynthetic process	5	0.5701254275940707	2.8792958597010634E-4	CTH, DHFR, PHGDH, PSPH, PSAT1, GM7901	638	8	13588	13.311128526645765	0.4833127953955797	0.012381532966829312	0.5017537183783283
GOTERM_BP_FAT	GO:0051303~establishment of chromosome localization	5	0.5701254275940707	2.8792958597010634E-4	CCDC99, KIF18A, CENPF, BIRC5, CDCA5	638	8	13588	13.311128526645765	0.4833127953955797	0.012381532966829312	0.5017537183783283
GOTERM_BP_FAT	GO:0050000~chromosome localization	5	0.5701254275940707	2.8792958597010634E-4	CCDC99, KIF18A, CENPF, BIRC5, CDCA5	638	8	13588	13.311128526645765	0.4833127953955797	0.012381532966829312	0.5017537183783283
GOTERM_BP_FAT	GO:0008156~negative regulation of DNA replication	5	0.5701254275940707	0.0012122776962138297	CLSPN, GMNN, TIPIN, BRCA2, CDT1	638	11	13588	9.680820746651467	0.9380507040954827	0.04457342348647919	2.096554747497592
GOTERM_BP_FAT	GO:0006268~DNA unwinding during replication	5	0.5701254275940707	0.0012122776962138297	MCM7, MCM2, MCM4, MCM6, RAD51	638	11	13588	9.680820746651467	0.9380507040954827	0.04457342348647919	2.096554747497592
GOTERM_BP_FAT	GO:0032508~DNA duplex unwinding	5	0.5701254275940707	0.0017513839655802664	MCM7, MCM2, MCM4, MCM6, RAD51	638	12	13588	8.874085684430511	0.982037055044122	0.0608723030311239	3.0155298012288556
GOTERM_BP_FAT	GO:0032392~DNA geometric change	5	0.5701254275940707	0.002436676878982253	MCM7, MCM2, MCM4, MCM6, RAD51	638	13	13588	8.191463708705086	0.9962803227835014	0.07680608727373606	4.171962180438083
GOTERM_BP_FAT	GO:0006221~pyrimidine nucleotide biosynthetic process	5	0.5701254275940707	0.012723081816334133	GM5566, TYMS, UMPS, NME2, CTPS, NME6	638	20	13588	5.324451410658306	0.9999999999998227	0.2682770160499217	20.041928922057306
GOTERM_BP_FAT	GO:0030199~collagen fibril organization	5	0.5701254275940707	0.015146381018818031	COL2A1, LOX, COL11A1, SERPINH1, COL5A2	638	21	13588	5.070906105388864	0.9999999999999993	0.30030147390799433	23.401696814167792
GOTERM_BP_FAT	GO:0031032~actomyosin structure organization	5	0.5701254275940707	0.027632573193268967	ACTG1, GM12715, GM8399, LIMCH1, ACTG-PS1, CNN2, CNN1, RACGAP1	638	25	13588	4.259561128526645	1.0	0.44538469220400945	38.70484450380967
GOTERM_BP_FAT	GO:0000077~DNA damage checkpoint	5	0.5701254275940707	0.049884380171371694	CDK1, CCND1, TIPIN, H2AFX, CHEK1	638	30	13588	3.549634273772204	1.0	0.5806959837323744	59.09204889529792
GOTERM_BP_FAT	GO:0051235~maintenance of location	5	0.5701254275940707	0.06682454159390416	NUF2, TMSB10, CENPE, TACC3, GM9844, ASPM	638	33	13588	3.2269402488838224	1.0	0.6600081686250429	70.12343605622704
GOTERM_BP_FAT	GO:0051783~regulation of nuclear division	5	0.5701254275940707	0.08636020648279771	MAD2L1, CEP192, NUSAP1, CENPE, NEK6	638	36	13588	2.958028561476837	1.0	0.7394115657705291	79.35414215523951
GOTERM_BP_FAT	GO:0007088~regulation of mitosis	5	0.5701254275940707	0.08636020648279771	MAD2L1, CEP192, NUSAP1, CENPE, NEK6	638	36	13588	2.958028561476837	1.0	0.7394115657705291	79.35414215523951
GOTERM_BP_FAT	GO:0051310~metaphase plate congression	4	0.45610034207525657	0.0018438297902934526	CCDC99, KIF18A, CENPF, CDCA5	638	6	13588	14.198537095088819	0.9854738422577035	0.0630306247564959	3.1722963013241623
GOTERM_BP_FAT	GO:0046605~regulation of centrosome cycle	4	0.45610034207525657	0.0031145679137511185	PLK4, CEP192, NPM1, RANBP1	638	7	13588	12.170174652933273	0.9992173688411916	0.09583584944223955	5.303104745542897
GOTERM_BP_FAT	GO:0007076~mitotic chromosome condensation	4	0.45610034207525657	0.0031145679137511185	NUSAP1, CDCA5, NCAPD3, SMC4	638	7	13588	12.170174652933273	0.9992173688411916	0.09583584944223955	5.303104745542897
GOTERM_BP_FAT	GO:0007098~centrosome cycle	4	0.45610034207525657	0.0031145679137511185	KIF11, SAC3D1, NPM1, BRCA1	638	7	13588	12.170174652933273	0.9992173688411916	0.09583584944223955	5.303104745542897
GOTERM_BP_FAT	GO:0031577~spindle checkpoint	4	0.45610034207525657	0.00481055091024531	MAD2L1, CEP192, CENPE, BIRC5	638	8	13588	10.648902821316613	0.999984226989083	0.13061106414025048	8.078167163553719
GOTERM_BP_FAT	GO:0046112~nucleobase biosynthetic process	4	0.45610034207525657	0.006966289336878186	UMPS, CAD, ADA, APRT	638	9	13588	9.465691396725878	0.9999998907470409	0.17562331360173422	11.494924188432364
GOTERM_BP_FAT	GO:0031109~microtubule polymerization or depolymerization	4	0.45610034207525657	0.012757144918594573	TPPP, GM11223, KIF18A, FBXO5, STMN1	638	11	13588	7.744656597321174	0.9999999999998362	0.2664783238582715	20.090103482104517
GOTERM_BP_FAT	GO:0045132~meiotic chromosome segregation	4	0.45610034207525657	0.012757144918594573	SGOL2, SGOL1, ESPL1, PTTG1	638	11	13588	7.744656597321174	0.9999999999998362	0.2664783238582715	20.090103482104517
GOTERM_BP_FAT	GO:0006544~glycine metabolic process	4	0.45610034207525657	0.016425731902940825	SHMT1, SHMT2, DHFR, PHGDH, GM7901	638	12	13588	7.099268547544409	1.0	0.31859994710933925	25.121314238062542
GOTERM_BP_FAT	GO:0033261~regulation of S phase	4	0.45610034207525657	0.016425731902940825	DBF4, TIPIN, BRCA2, CDT1	638	12	13588	7.099268547544409	1.0	0.31859994710933925	25.121314238062542
GOTERM_BP_FAT	GO:0007143~female meiosis	4	0.45610034207525657	0.030609061994067783	ADCY3, FBXO5, LFNG, TRIP13	638	15	13588	5.679414838035528	1.0	0.4678472284408076	41.90095993739125
GOTERM_BP_FAT	GO:0030071~regulation of mitotic metaphase/anaphase transition	4	0.45610034207525657	0.03639314199150266	MAD2L1, CEP192, CENPE, NEK6	638	16	13588	5.324451410658306	1.0	0.5104823912170647	47.66775753140906
GOTERM_BP_FAT	GO:0010948~negative regulation of cell cycle process	4	0.45610034207525657	0.049502870133781095	RECQL4, MAD2L1, CEP192, CENPE	638	18	13588	4.732845698362939	1.0	0.5832662267357733	58.804171667949554
GOTERM_BP_FAT	GO:0006541~glutamine metabolic process	4	0.45610034207525657	0.056804193872504335	CTPS, PHGDH, ASNS, CAD, GM7901	638	19	13588	4.483748556343837	1.0	0.6162797077115771	63.99564024005981
GOTERM_BP_FAT	GO:0009112~nucleobase metabolic process	4	0.45610034207525657	0.056804193872504335	UMPS, CAD, ADA, APRT	638	19	13588	4.483748556343837	1.0	0.6162797077115771	63.99564024005981
GOTERM_BP_FAT	GO:0051320~S phase	3	0.34207525655644244	0.006378094684183558	ANP32B, POLA1, TFDP1	638	3	13588	21.297805642633232	0.9999995752691253	0.16567599601614613	10.574732629182936
GOTERM_BP_FAT	GO:0000084~S phase of mitotic cell cycle	3	0.34207525655644244	0.006378094684183558	ANP32B, POLA1, TFDP1	638	3	13588	21.297805642633232	0.9999995752691253	0.16567599601614613	10.574732629182936
GOTERM_BP_FAT	GO:0045005~maintenance of fidelity during DNA-dependent DNA replication	3	0.34207525655644244	0.006378094684183558	POLD1, TIPIN, BRCA2	638	3	13588	21.297805642633232	0.9999995752691253	0.16567599601614613	10.574732629182936
GOTERM_BP_FAT	GO:0006564~L-serine biosynthetic process	3	0.34207525655644244	0.006378094684183558	PHGDH, PSPH, PSAT1, GM7901	638	3	13588	21.297805642633232	0.9999995752691253	0.16567599601614613	10.574732629182936
GOTERM_BP_FAT	GO:0032297~negative regulation of DNA replication initiation	3	0.34207525655644244	0.012360288890452212	CLSPN, TIPIN, CDT1	638	4	13588	15.973354231974922	0.9999999999995884	0.2640943120414383	19.527138722227356
GOTERM_BP_FAT	GO:0007080~mitotic metaphase plate congression	3	0.34207525655644244	0.012360288890452212	CCDC99, KIF18A, CDCA5	638	4	13588	15.973354231974922	0.9999999999995884	0.2640943120414383	19.527138722227356
GOTERM_BP_FAT	GO:0000076~DNA replication checkpoint	3	0.34207525655644244	0.012360288890452212	CLSPN, TIPIN, CDT1	638	4	13588	15.973354231974922	0.9999999999995884	0.2640943120414383	19.527138722227356
GOTERM_BP_FAT	GO:0007052~mitotic spindle organization	3	0.34207525655644244	0.019963688259921217	SPC25, GM11223, NDC80, STMN1	638	5	13588	12.778683385579937	1.0	0.3644927862856693	29.6892791008029
GOTERM_BP_FAT	GO:0030174~regulation of DNA replication initiation	3	0.34207525655644244	0.019963688259921217	CLSPN, TIPIN, CDT1	638	5	13588	12.778683385579937	1.0	0.3644927862856693	29.6892791008029
GOTERM_BP_FAT	GO:0010824~regulation of centrosome duplication	3	0.34207525655644244	0.02902361749472377	PLK4, CEP192, NPM1	638	6	13588	10.648902821316616	1.0	0.4528325070397854	40.21862304208588
GOTERM_BP_FAT	GO:0007094~mitotic cell cycle spindle assembly checkpoint	3	0.34207525655644244	0.03938723732709016	MAD2L1, CEP192, CENPE	638	7	13588	9.127630989699956	1.0	0.5215164894227211	50.43657133390377
GOTERM_BP_FAT	GO:0045841~negative regulation of mitotic metaphase/anaphase transition	3	0.34207525655644244	0.03938723732709016	MAD2L1, CEP192, CENPE	638	7	13588	9.127630989699956	1.0	0.5215164894227211	50.43657133390377
GOTERM_BP_FAT	GO:0033205~cytokinesis during cell cycle	3	0.34207525655644244	0.03938723732709016	BRCA2, NUSAP1, RACGAP1	638	7	13588	9.127630989699956	1.0	0.5215164894227211	50.43657133390377
GOTERM_BP_FAT	GO:0048041~focal adhesion formation	3	0.34207525655644244	0.050912799465538644	DLC1, JUB, SORBS1	638	8	13588	7.986677115987461	1.0	0.5856432198524317	59.85864894925952
GOTERM_BP_FAT	GO:0009263~deoxyribonucleotide biosynthetic process	3	0.34207525655644244	0.050912799465538644	TYMS, RRM2, RRM1	638	8	13588	7.986677115987461	1.0	0.5856432198524317	59.85864894925952
GOTERM_BP_FAT	GO:0045839~negative regulation of mitosis	3	0.34207525655644244	0.050912799465538644	MAD2L1, CEP192, CENPE	638	8	13588	7.986677115987461	1.0	0.5856432198524317	59.85864894925952
GOTERM_BP_FAT	GO:0051784~negative regulation of nuclear division	3	0.34207525655644244	0.050912799465538644	MAD2L1, CEP192, CENPE	638	8	13588	7.986677115987461	1.0	0.5856432198524317	59.85864894925952
GOTERM_BP_FAT	GO:0007131~reciprocal meiotic recombination	3	0.34207525655644244	0.06346894521670181	TOPBP1, RAD51, TRIP13	638	9	13588	7.09926854754441	1.0	0.6480100084733611	68.19023496120228
GOTERM_BP_FAT	GO:0016446~somatic hypermutation of immunoglobulin genes	3	0.34207525655644244	0.06346894521670181	EXO1, UNG, PMS2	638	9	13588	7.09926854754441	1.0	0.6480100084733611	68.19023496120228
GOTERM_BP_FAT	GO:0002566~somatic diversification of immune receptors via somatic mutation	3	0.34207525655644244	0.06346894521670181	EXO1, UNG, PMS2	638	9	13588	7.09926854754441	1.0	0.6480100084733611	68.19023496120228
GOTERM_BP_FAT	GO:0001833~inner cell mass cell proliferation	3	0.34207525655644244	0.07693404533153991	GINS1, NCAPG2, BRCA2	638	10	13588	6.389341692789968	1.0	0.6987372247381785	75.29989624188357
GOTERM_BP_FAT	GO:0001556~oocyte maturation	3	0.34207525655644244	0.07693404533153991	FBXO5, BRCA2, TRIP13	638	10	13588	6.389341692789968	1.0	0.6987372247381785	75.29989624188357
GOTERM_BP_FAT	GO:0007090~regulation of S phase of mitotic cell cycle	3	0.34207525655644244	0.09119557875562911	DBF4, BRCA2, CDT1	638	11	13588	5.808492447990881	1.0	0.7525675362861992	81.18182554719444
GOTERM_BP_FAT	GO:0046823~negative regulation of nucleocytoplasmic transport	3	0.34207525655644244	0.09119557875562911	TACC3, PKIA, BARD1	638	11	13588	5.808492447990881	1.0	0.7525675362861992	81.18182554719444
GOTERM_BP_FAT	GO:0006271~DNA strand elongation during DNA replication	2	0.22805017103762829	0.09156479100817548	DNA2, POLA1	638	2	13588	21.297805642633225	1.0	0.751838463622584	81.31492143379009
GOTERM_BP_FAT	GO:0051322~anaphase	2	0.22805017103762829	0.09156479100817548	FAM33A, SKA1	638	2	13588	21.297805642633225	1.0	0.751838463622584	81.31492143379009
GOTERM_BP_FAT	GO:0000090~mitotic anaphase	2	0.22805017103762829	0.09156479100817548	FAM33A, SKA1	638	2	13588	21.297805642633225	1.0	0.751838463622584	81.31492143379009
GOTERM_BP_FAT	GO:0040001~establishment of mitotic spindle localization	2	0.22805017103762829	0.09156479100817548	CCDC99, NUSAP1	638	2	13588	21.297805642633225	1.0	0.751838463622584	81.31492143379009
GOTERM_BP_FAT	GO:0046607~positive regulation of centrosome cycle	2	0.22805017103762829	0.09156479100817548	PLK4, RANBP1	638	2	13588	21.297805642633225	1.0	0.751838463622584	81.31492143379009
GOTERM_BP_FAT	GO:0021882~regulation of transcription from RNA polymerase II promoter involved in forebrain neuron fate commitment	2	0.22805017103762829	0.09156479100817548	DLX2, DLX1	638	2	13588	21.297805642633225	1.0	0.751838463622584	81.31492143379009
GOTERM_BP_FAT	GO:0048478~replication fork protection	2	0.22805017103762829	0.09156479100817548	TIPIN, BRCA2	638	2	13588	21.297805642633225	1.0	0.751838463622584	81.31492143379009
GOTERM_BP_FAT	GO:0021893~cerebral cortex GABAergic interneuron fate commitment	2	0.22805017103762829	0.09156479100817548	DLX2, DLX1	638	2	13588	21.297805642633225	1.0	0.751838463622584	81.31492143379009
GOTERM_BP_FAT	GO:0022616~DNA strand elongation	2	0.22805017103762829	0.09156479100817548	DNA2, POLA1	638	2	13588	21.297805642633225	1.0	0.751838463622584	81.31492143379009
GOTERM_BP_FAT	GO:0010389~regulation of G2/M transition of mitotic cell cycle	2	0.22805017103762829	0.09156479100817548	CENPF, PKIA	638	2	13588	21.297805642633225	1.0	0.751838463622584	81.31492143379009
GOTERM_BP_FAT	GO:0090004~positive regulation of establishment of protein localization to plasma membrane	2	0.22805017103762829	0.09156479100817548	SORBS1, PRKCI	638	2	13588	21.297805642633225	1.0	0.751838463622584	81.31492143379009
GOTERM_BP_FAT	GO:0021898~commitment of multipotent stem cells to the neuronal lineage in the forebrain	2	0.22805017103762829	0.09156479100817548	DLX2, DLX1	638	2	13588	21.297805642633225	1.0	0.751838463622584	81.31492143379009
GOTERM_BP_FAT	GO:0006273~lagging strand elongation	2	0.22805017103762829	0.09156479100817548	DNA2, POLA1	638	2	13588	21.297805642633225	1.0	0.751838463622584	81.31492143379009

## Sheet: CC-FAT-Down in spheres
Category	Term	Count	%	PValue	Genes	List Total	Pop Hits	Pop Total	Fold Enrichment	Bonferroni	Benjamini	FDR
GOTERM_CC_FAT	GO:0043228~non-membrane-bounded organelle	239	27.25199543899658	6.15619486080098E-64	HMGN1, JUB, RPL17, KIFC1, RPL19, HMGN2, TUBB2B, RPL14, RPL13, TUBB2A, GM10159, GM13237, GM14166, PDLIM1, H1FX, AURKA, AURKB, RPL22L1, HMGN4, GM13841, CITED2, ACTG1, PRIM1, CDCA8, DDX11, INCENP, PRIM2, H2AFZ, H2AFX, NUP37, GM6472, SPIRE1, GM9430, NCAPD3, NCAPD2, FARP2, GM7079, RFC5, RPS18, MAD2L1, RND1, RPS19, RFC4, RPS16, RFC2, SPAG5, GM8430, RPS13, GM4167, RPS11, TGFB1I1, DBN1, CCDC99, LMNB1, GM…	522	1919	12504	2.9833306379639777	2.0069195246211193E-61	2.0069195246211193E-61	8.330738144504462E-61
GOTERM_CC_FAT	GO:0043232~intracellular non-membrane-bounded organelle	239	27.25199543899658	6.15619486080098E-64	HMGN1, JUB, RPL17, KIFC1, RPL19, HMGN2, TUBB2B, RPL14, RPL13, TUBB2A, GM10159, GM13237, GM14166, PDLIM1, H1FX, AURKA, AURKB, RPL22L1, HMGN4, GM13841, CITED2, ACTG1, PRIM1, CDCA8, DDX11, INCENP, PRIM2, H2AFZ, H2AFX, NUP37, GM6472, SPIRE1, GM9430, NCAPD3, NCAPD2, FARP2, GM7079, RFC5, RPS18, MAD2L1, RND1, RPS19, RFC4, RPS16, RFC2, SPAG5, GM8430, RPS13, GM4167, RPS11, TGFB1I1, DBN1, CCDC99, LMNB1, GM…	522	1919	12504	2.9833306379639777	2.0069195246211193E-61	2.0069195246211193E-61	8.330738144504462E-61
GOTERM_CC_FAT	GO:0005856~cytoskeleton	108	12.314709236031927	6.144618498994345E-17	KIFC1, JUB, TUBB2B, PRC1, TUBB2A, KNTC1, AURKA, PDLIM1, AURKB, ACTG1, CDCA8, GM8399, INCENP, ASPM, ENC1, SPIRE1, TOPBP1, TMSB10, TACC3, GM9430, GM3226, FARP2, MAD2L1, RND1, SPAG5, STMN1, TGFB1I1, DBN1, FGD1, CCDC99, LMNB1, NEK2, CHEK1, ANLN, MYL9, CDC42EP2, SAC3D1, NPM1, FBXO5, MNS1, SKA1, CDC42EP3, CKAP2, GM12715, EVL, CSRP1, SEPT11, BRCA1, CORO1C, PLK4, MCPH1, EPB4.1L4A, MARCKS, KIF23, GYPC, KI…	522	1122	12504	2.3057348331182	3.6193270602780103E-14	2.7755575615628914E-15	1.5543122344752192E-13
GOTERM_CC_FAT	GO:0005694~chromosome	91	10.376282782212087	4.868009421571614E-44	HMGN1, HMGN2, GM13237, KNTC1, H1FX, AURKB, HMGN4, CITED2, PRIM1, CDCA8, OIP5, INCENP, PRIM2, H2AFZ, H2AFX, NUP37, SGOL2, SGOL1, TOPBP1, NCAPD3, NCAPD2, RFC5, RFC4, MAD2L1, RFC2, SPAG5, CCDC99, HMGB2, HMGB3, BLM, NEK2, TIPIN, CHEK1, SPC24, SPC25, SKA1, ASF1B, GM11663, HELLS, ERCC6L, MKI67, NUF2, SUV39H1, NDC80, PMF1, BRCA1, PCNA, DNMT1, TMPO, KIF22, CLSPN, FANCI, GM7125, GM8203, TOP2A, DSN1, NUP85…	522	378	12504	5.766709237973606	1.5869710714323461E-41	7.934855357161731E-42	6.587528935173644E-41
GOTERM_CC_FAT	GO:0044430~cytoskeletal part	79	9.007981755986318	1.6309049470469456E-13	KIF23, KIFC1, JUB, KIF22, TUBB2B, PRC1, TUBB2A, NCS1, KNTC1, AURKA, AURKB, RHOU, GTSE1, FAM83D, ACTG1, KIF2C, GM5915, CDCA8, PLCB4, GM8399, INCENP, TUBB5, TUBB6, GM5593, RANBP1, MYC, TUBA1B, ASPM, CDC6, KIF11, KIF15, TPX2, NUSAP1, NUP85, TACC3, GM9430, GM3226, ANKRD26, SASS6, MAD2L1, SPAG5, GM11223, STMN1, HAUS4, CCDC99, HAUS5, LMNB1, NEK2, CALD1, HAUS1, ACTG-PS1, ANLN, CEP55, TPM2, ANKRD32, TPM1…	522	774	12504	2.4449196590335323	5.316791451548397E-11	3.797739900335273E-12	2.2070123506523487E-10
GOTERM_CC_FAT	GO:0044427~chromosomal part	78	8.893956670467503	3.7574085858350127E-38	HMGN1, KIF22, HMGN2, KNTC1, H1FX, AURKB, HMGN4, CITED2, PRIM1, CDCA8, OIP5, INCENP, PRIM2, H2AFZ, GM7125, NUP37, H2AFX, GM8203, DSN1, SGOL2, SGOL1, NUP85, MCM2, NCAPD3, CDK2, RAD51, RFC5, MAD2L1, RFC4, APITD1, RIF1, SPAG5, RFC2, NSL1, BUB1B, CCDC99, BLM, NEK2, TIPIN, POLA1, CHEK1, POLA2, C79407, SPC24, RPA1, RPA2, SPC25, GM7862, CENPA, HJURP, F630043A04RIK, BUB1, SKA1, ZWILCH, ASF1B, GM11663, HEL…	522	318	12504	5.8755150726523535	1.2249151989822142E-35	4.0830506632740477E-36	5.084632266892153E-35
GOTERM_CC_FAT	GO:0031974~membrane-enclosed lumen	71	8.095781071835804	0.0012904241540068417	GAR1, E2F7, LYAR, EZH2, E2F8, TCOF1, PDIA5, PDLIM1, GM10094, EBNA1BP2, CDCA8, DDX11, NPM3-PS1, GRWD1, OIP5, CPOX, LSM4, GM14217, MYC, TOP2A, LBR, GM15500, EXOSC8, GM5643, GM6636, GM12141, GATM, RBL1, EXOSC2, NUSAP1, GM9797, RBBP7, GM5806, ZFP593, AHR, CDK2, MRTO4, CCND1, PA2G4, GM6136, TIMM8A1, RPS19, NRM, THOC4, TGFB1I1, NHP2, GM14072, NGF, LMNB1, LIN9, POLA1, CHEK1, SERPINH1, RPA1, HJURP, NPM1,…	522	1174	12504	1.448667489083397	0.3435770353609364	0.011624955670324844	1.7321884534841514
GOTERM_CC_FAT	GO:0070013~intracellular organelle lumen	67	7.639680729760548	0.003123365293545726	GAR1, E2F7, LYAR, EZH2, TCOF1, E2F8, PDIA5, PDLIM1, GM10094, EBNA1BP2, CDCA8, DDX11, NPM3-PS1, GRWD1, OIP5, LSM4, GM14217, MYC, LBR, TOP2A, GM15500, EXOSC8, GM5643, GM6636, GM12141, RBL1, EXOSC2, NUSAP1, RBBP7, GM5806, ZFP593, AHR, CDK2, MRTO4, CCND1, PA2G4, GM6136, RPS19, NRM, THOC4, TGFB1I1, NHP2, GM14072, NGF, LMNB1, LIN9, POLA1, CHEK1, SERPINH1, RPA1, HJURP, NPM1, HSPE1, WDHD1, GEMIN6, GM9855…	522	1133	12504	1.4165221008207283	0.6393367337630884	0.0245666329583053	4.144890684965919
GOTERM_CC_FAT	GO:0043233~organelle lumen	67	7.639680729760548	0.00334287292579523	GAR1, E2F7, LYAR, EZH2, TCOF1, E2F8, PDIA5, PDLIM1, GM10094, EBNA1BP2, CDCA8, DDX11, NPM3-PS1, GRWD1, OIP5, LSM4, GM14217, MYC, LBR, TOP2A, GM15500, EXOSC8, GM5643, GM6636, GM12141, RBL1, EXOSC2, NUSAP1, RBBP7, GM5806, ZFP593, AHR, CDK2, MRTO4, CCND1, PA2G4, GM6136, RPS19, NRM, THOC4, TGFB1I1, NHP2, GM14072, NGF, LMNB1, LIN9, POLA1, CHEK1, SERPINH1, RPA1, HJURP, NPM1, HSPE1, WDHD1, GEMIN6, GM9855…	522	1136	12504	1.4127812854136312	0.6643217394511521	0.02565568050975542	4.430120858227471
GOTERM_CC_FAT	GO:0030529~ribonucleoprotein complex	65	7.411630558722919	7.106371334130604E-18	RPL17, RPL36A, RPL19, RPL14, RPL13, GM10159, LSM6, SNRPD1, GM14166, RPL22L1, GM13841, SNORA64, LSM5, LSM4, GM14217, LSM2, RPS27A, SNRPA1, RPL35A, GM6472, GM8731, GM7618, GM11539, MRTO4, GM7079, PA2G4, RPS18, GM6136, RPS19, GM13092, RPS16, GM8186, GM8430, RPS13, GM4167, RPS11, SNRPF, GM10288, SNRPE, SNRPG, GM13253, GM15148, GM14586, GM10036, RPS28, RPS29, NPM1, GM8129, RPL4, HNRNPAB, GM11968, RPSA…	522	462	12504	3.3701547494650943	2.316677054926577E-15	2.3166770549265773E-16	9.616543998503684E-15
GOTERM_CC_FAT	GO:0015630~microtubule cytoskeleton	64	7.297605473204105	7.72415892299309E-18	KIF23, KIFC1, KIF22, JUB, PRC1, TUBB2B, TUBB2A, KNTC1, AURKA, AURKB, GTSE1, FAM83D, KIF2C, CDCA8, INCENP, TUBB5, GM5593, TUBB6, RANBP1, MYC, TUBA1B, ASPM, CDC6, KIF11, KIF15, TPX2, NUSAP1, NUP85, TACC3, GM9430, GM3226, SASS6, MAD2L1, SPAG5, GM11223, STMN1, HAUS4, CCDC99, HAUS5, NEK2, HAUS1, CEP55, ANKRD32, SAC3D1, KIF4, F630043A04RIK, NPM1, FBXO5, SKA1, CKAP2, FAM33A, GM5620, CEP192, DLGAP5, KIF1…	522	450	12504	3.406794380587484	2.518075808895747E-15	2.289159826268861E-16	1.0452551751362325E-14
GOTERM_CC_FAT	GO:0031981~nuclear lumen	61	6.955530216647662	1.0750988875937617E-4	GAR1, E2F7, LYAR, EZH2, TCOF1, E2F8, PDLIM1, GM10094, EBNA1BP2, CDCA8, DDX11, NPM3-PS1, GRWD1, OIP5, LSM4, GM14217, MYC, LBR, TOP2A, GM15500, EXOSC8, GM5643, GM6636, RBL1, EXOSC2, NUSAP1, RBBP7, GM5806, ZFP593, AHR, CDK2, MRTO4, CCND1, PA2G4, GM6136, RPS19, NRM, THOC4, TGFB1I1, NHP2, GM14072, LMNB1, LIN9, POLA1, CHEK1, RPA1, HJURP, NPM1, WDHD1, GEMIN6, GM9855, PHLDA1, TFDP1, GM5461, RRP12, MKI67,…	522	883	12504	1.6548079301232734	0.03444296697628191	0.001207894317542979	0.14538747312228262
GOTERM_CC_FAT	GO:0000775~chromosome, centromeric region	48	5.473204104903079	7.719576419071766E-36	CCDC99, NEK2, KNTC1, AURKB, C79407, SPC24, SPC25, CDCA8, HJURP, OIP5, CENPA, INCENP, F630043A04RIK, BUB1, NUP37, SKA1, ZWILCH, HELLS, ERCC6L, FAM33A, CENPN, CENPM, CENPL, MKI67, DSN1, CENPQ, SGOL2, SGOL1, CENPP, NUF2, SUV39H1, CENPF, NUP85, NDC80, CENPE, BIRC5, PMF1, CENPK, MLF1IP, CENPI, 2610039C10RIK, CENPH, MAD2L1, APITD1, SPAG5, NSL1, DNMT1, BUB1B	522	111	12504	10.358496427461944	2.5165819126173957E-33	6.291454781543489E-34	1.0446350576598058E-32
GOTERM_CC_FAT	GO:0000793~condensed chromosome	43	4.903078677309008	1.7330743407621097E-30	HMGB2, CCDC99, NEK2, GM13237, KNTC1, SPC24, RPA1, SPC25, HJURP, CENPA, INCENP, F630043A04RIK, BUB1, NUP37, SKA1, ZWILCH, TOP2A, ERCC6L, FAM33A, CENPN, CENPM, MKI67, DSN1, SGOL2, SGOL1, NUF2, CENPF, NUP85, NDC80, CENPE, TOPBP1, PMF1, MLF1IP, NCAPD3, BRCA1, CDK2, NCAPD2, CENPH, RAD51, MAD2L1, SPAG5, FANCD2, NSL1, BUB1B	522	107	12504	9.62638307014717	5.649822350884477E-28	1.1299644701768956E-28	2.3452455362938814E-27
GOTERM_CC_FAT	GO:0005840~ribosome	41	4.67502850627138	1.1431663259515704E-17	RPL17, RPL36A, RPL19, RPL14, RPL13, GM15450, GM10159, GM5786, GM10196, GM9083, GM14166, RPL22L1, GM10059, RPS2, GM5451, GM13841, GM15501, GM10259, GM14217, RPS27A, GM15500, RPL35A, GM6636, GM6472, GM13573, GM10184, GM8731, GM6834, GM7618, GM5908, GM11539, MRTO4, GM7079, RPS18, GM6136, RPS19, RPS16, GM8430, GM6525, RPS13, GM4167, RPS11, GM10288, GM14072, KPNA2, GM14303, GM7290, GM12034, GM13253, G…	522	192	12504	5.115181992337165	3.7267222226021196E-15	3.105601852168433E-16	1.5469652167375807E-14
GOTERM_CC_FAT	GO:0005819~spindle	33	3.762827822120866	4.614909703881216E-19	HAUS4, KIF22, KIFC1, CCDC99, HAUS5, PRC1, NEK2, HAUS1, KNTC1, AURKA, AURKB, FAM83D, SAC3D1, INCENP, F630043A04RIK, FBXO5, SKA1, MYC, ASPM, FAM33A, CDC6, DLGAP5, KIF15, KIF18A, TPX2, CENPF, NUSAP1, BIRC5, CENPE, NUP85, RACGAP1, GM9430, MAD2L1, SPAG5	522	109	12504	7.252135400189814	1.5044605634652764E-16	1.6716228482947517E-17	6.245027191774903E-16
GOTERM_CC_FAT	GO:0005874~microtubule	33	3.762827822120866	5.276617932088153E-9	HAUS4, KIF23, KIF22, KIFC1, HAUS5, PRC1, TUBB2B, TUBB2A, HAUS1, GTSE1, KIF2C, INCENP, KIF4, F630043A04RIK, TUBB5, TUBB6, SKA1, TUBA1B, FAM33A, CKAP2, KIF11, GM5620, KIF15, KIF18A, TPX2, NUSAP1, KIF18B, BIRC5, MID1, GM14150, GM3226, MID2, SPAG5, GM11223, KIF20B, STMN1, KIF20A	522	240	12504	3.2936781609195407	1.7201759671126027E-6	1.0751108459050585E-7	7.140469349131706E-6
GOTERM_CC_FAT	GO:0005730~nucleolus	32	3.6488027366020526	5.745337953883252E-6	GAR1, LYAR, TCOF1, POLA1, EBNA1BP2, CDCA8, NPM3-PS1, DDX11, HJURP, GRWD1, NPM1, GM14217, TOP2A, GM15500, PHLDA1, EXOSC8, GM6636, RRP12, MKI67, EME1, EXOSC2, NUSAP1, GM9091, ZFP593, FBL, MRTO4, DIS3, PA2G4, PLK4, GM6136, RPS19, NOP16, NOP58, PARP1, GM14072, NHP2	522	310	12504	2.47267334074898	0.0018712326105635446	8.513208303229103E-5	0.007774474987842783
GOTERM_CC_FAT	GO:0000779~condensed chromosome, centromeric region	31	3.534777651083238	6.139880333628223E-26	CCDC99, KNTC1, SPC24, SPC25, HJURP, CENPA, INCENP, F630043A04RIK, BUB1, NUP37, SKA1, ZWILCH, ERCC6L, FAM33A, CENPN, CENPM, DSN1, SGOL2, SGOL1, NUF2, CENPF, NDC80, CENPE, NUP85, PMF1, MLF1IP, CENPH, MAD2L1, SPAG5, NSL1, BUB1B	522	60	12504	12.376245210727971	2.0016009887628008E-23	3.336001647938002E-24	8.308660861880898E-23
GOTERM_CC_FAT	GO:0000777~condensed chromosome kinetochore	29	3.30672748004561	3.6677392049595844E-25	CCDC99, KNTC1, SPC24, SPC25, HJURP, CENPA, INCENP, F630043A04RIK, BUB1, NUP37, SKA1, ZWILCH, ERCC6L, FAM33A, CENPN, CENPM, DSN1, NUF2, CENPF, NDC80, CENPE, NUP85, PMF1, MLF1IP, CENPH, MAD2L1, SPAG5, NSL1, BUB1B	522	53	12504	13.10691823899371	1.1956829808168244E-22	1.7081185440240348E-23	4.963289107920763E-22
GOTERM_CC_FAT	GO:0000776~kinetochore	29	3.30672748004561	9.860267223218326E-23	CCDC99, KNTC1, SPC24, SPC25, HJURP, CENPA, INCENP, F630043A04RIK, BUB1, NUP37, SKA1, ZWILCH, ERCC6L, FAM33A, CENPN, CENPM, DSN1, NUF2, CENPF, NDC80, CENPE, NUP85, PMF1, MLF1IP, CENPH, MAD2L1, SPAG5, NSL1, BUB1B	522	62	12504	11.204301075268818	3.2144471147691744E-20	4.018058893461468E-21	1.334319431545485E-19
GOTERM_CC_FAT	GO:0005815~microtubule organizing center	23	2.6225769669327255	1.2684241957201856E-5	HAUS4, KIFC1, JUB, HAUS5, CEP192, DLGAP5, HAUS1, CENPF, BIRC5, AURKA, CEP55, TACC3, ANKRD32, BRCA1, CCNB1, SASS6, PLK4, MAD2L1, SAC3D1, MCPH1, NPM1, GM5593, RANBP1, MARCKS	522	189	12504	2.9150398345800643	0.004126551394513567	1.7228053730955484E-4	0.01716331311663044
GOTERM_CC_FAT	GO:0005813~centrosome	22	2.508551881413911	3.0045509544046227E-6	HAUS4, KIFC1, JUB, HAUS5, CEP192, DLGAP5, HAUS1, CENPF, BIRC5, AURKA, CEP55, TACC3, ANKRD32, BRCA1, CCNB1, SASS6, PLK4, SAC3D1, MCPH1, NPM1, GM5593, RANBP1, MARCKS	522	160	12504	3.2936781609195407	9.79005543646938E-4	4.8973054909806635E-5	0.0040657673405775085
GOTERM_CC_FAT	GO:0005578~proteinaceous extracellular matrix	22	2.508551881413911	0.01282815409805348	BMP4, NTN4, POSTN, NID1, COL2A1, NID2, COL5A2, MMP12, ABI3BP, TIMP1, FBLN1, NAV2, CTGF, COL12A1, ADAMTS1, ADAM19, LOX, FBN2, MFAP5, LOXL1, COL11A1, ADAMTS5	522	297	12504	1.774372073222648	0.9851392741372633	0.08073484059855118	16.03056269245291
GOTERM_CC_FAT	GO:0031012~extracellular matrix	22	2.508551881413911	0.01917893760707369	BMP4, NTN4, POSTN, NID1, COL2A1, NID2, COL5A2, MMP12, ABI3BP, TIMP1, FBLN1, NAV2, CTGF, COL12A1, ADAMTS1, ADAM19, LOX, FBN2, MFAP5, LOXL1, COL11A1, ADAMTS5	522	309	12504	1.7054644198936133	0.9981875359745291	0.11229383936292836	23.05320150385588
GOTERM_CC_FAT	GO:0000228~nuclear chromosome	21	2.394526795895097	1.2095576743462313E-7	NEK2, ZFP57, SGOL2, SGOL1, SUV39H1, TIPIN, POLA1, TOPBP1, POLA2, MCM2, NCAPD3, RAD51, CITED2, PRIM1, RPA1, RPA2, INCENP, PRIM2, H2AFY2, BUB1, H2AFX	522	121	12504	4.1573097748646335	3.94308051431258E-5	2.3195021663369175E-6	1.6368066384497837E-4
GOTERM_CC_FAT	GO:0000785~chromatin	20	2.280501710376283	5.6964179018750736E-5	HMGN1, KIF22, HMGN2, TIPIN, POLA1, H1FX, HMGN4, CITED2, GM7862, CENPA, OIP5, INCENP, GM7125, H2AFZ, H2AFX, ASF1B, GM11663, GM8203, HELLS, ZFP57, SUV39H1, H2AFY3, H2AFY2, DNMT1, TMPO	522	165	12504	2.9035179380006966	0.01839947554704069	6.875728208746157E-4	0.07705803941705502
GOTERM_CC_FAT	GO:0044454~nuclear chromosome part	19	2.1664766248574687	2.1808434399129625E-7	ZFP57, SGOL2, SGOL1, SUV39H1, TIPIN, POLA1, POLA2, MCM2, NCAPD3, RAD51, CITED2, PRIM1, RPA1, RPA2, INCENP, PRIM2, H2AFY2, BUB1, H2AFX	522	103	12504	4.418703269724362	7.109297668006498E-5	3.9497424166867745E-6	2.951175396281869E-4
GOTERM_CC_FAT	GO:0005635~nuclear envelope	16	1.8244013683010263	0.0018046151441035634	LMNB1, GM10184, POLA1, CENPF, NUP85, RPL38, ANKLE1, RNF43, TMEM48, NRM, IPO5, PCNA, GM10259, MNS1, GM8129, NUP37, TMPO, LBR, KPNB1, KPNA2	522	153	12504	2.5049958680790323	0.4450271071348847	0.014984950436782718	2.4146325315376305
GOTERM_CC_FAT	GO:0015629~actin cytoskeleton	16	1.8244013683010263	0.02460607102106055	ABLIM1, GM12715, ACTA2, CALD1, ACTG-PS1, ANLN, CSRP1, TPM2, FLNC, RHOU, TPM1, MYL9, ACTG1, ANKRD26, GM5915, GM8399, SORBS1, CIT, DBN1	522	205	12504	1.8695822820297168	0.9997030415459999	0.13500733825280486	28.61921312796141
GOTERM_CC_FAT	GO:0005657~replication fork	14	1.596351197263398	1.6139949987984793E-12	BLM, POLA1, CHEK1, POLA2, RFC5, PRIM1, RPA1, RPA2, RFC4, RFC2, PRIM2, PCNA, DNMT1, H2AFX	522	24	12504	13.973180076628353	5.261777680232171E-10	3.5078495663753984E-11	2.184163960805563E-9
GOTERM_CC_FAT	GO:0005681~spliceosome	13	1.4823261117445838	0.005544855366785197	SNRPA1, GM5643, GM5461, SNRPD1, HNRNPA1, TTF2, GM14277, GM13092, GM8186, LSM4, THOC4, GM7879, SNRNP40, LSM2, GEMIN6, SNRPF, SNRPE, SNRPG	522	124	12504	2.511308861698183	0.8367794550106329	0.039480674570165575	7.248226321837359
GOTERM_CC_FAT	GO:0033279~ribosomal subunit	12	1.3683010262257698	7.927717127374758E-5	RPL17, RPSA, RPL19, GM6636, GM12034, GM5786, GM15450, GM9083, GM5621, GM8731, GM7618, GM10059, RPS2, GM5451, GM9091, GM14586, GM7079, RPS19, RPS29, RPS16, NPM1, GM4167, GM14072, GM14303	522	66	12504	4.355276907001045	0.025514249316122117	9.22623489662433E-4	0.1072268486294492
GOTERM_CC_FAT	GO:0032993~protein-DNA complex	12	1.3683010262257698	2.578033783200934E-4	POLA1, H1FX, POLA2, PRIM1, RPA1, RPA2, CENPA, H2AFY3, H2AFY2, PRIM2, H2AFZ, H2AFX, GM8203	522	75	12504	3.8326436781609194	0.08061906906427097	0.0027077704742334285	0.34830385806238207
GOTERM_CC_FAT	GO:0044420~extracellular matrix part	12	1.3683010262257698	0.0014977130681434968	FBLN1, NTN4, COL2A1, NID1, ADAMTS1, FBN2, LOX, NID2, COL11A1, MFAP5, COL5A2, TIMP1	522	92	12504	3.124437781109445	0.38652787889986195	0.013119142246576398	2.0078362474642453
GOTERM_CC_FAT	GO:0070161~anchoring junction	11	1.2542759407069555	0.03261932559729569	JUB, SORBS1, PVRL2, CTNND2, EVL, ZYX, TGFB1I1, NEXN, PERP, CDH3, RHOU	522	123	12504	2.1422296981590505	0.9999798277321809	0.16488571587762446	36.158951203555226
GOTERM_CC_FAT	GO:0016604~nuclear body	11	1.2542759407069555	0.07283775643643309	RPA1, GAR1, OIP5, NPM1, THOC4, GM7879, GEMIN6, GM5806, NHP2, MYC, FBL, GM9855	522	142	12504	1.8555933300955159	0.9999999999803768	0.3004435570079603	64.06297741601841
GOTERM_CC_FAT	GO:0045121~membrane raft	10	1.1402508551881414	0.008740354676637254	ADCY3, CAV1, SORBS1, NRM, EFNB1, SDPR, TUBB5, KIF18A, SCARB1, PAG1	522	85	12504	2.8181203515889113	0.9428388524859898	0.059074281990526	11.201185902066902
GOTERM_CC_FAT	GO:0005912~adherens junction	10	1.1402508551881414	0.03263410358867394	JUB, SORBS1, PVRL2, CTNND2, EVL, ZYX, TGFB1I1, NEXN, CDH3, RHOU	522	106	12504	2.259813489481674	0.9999799279425532	0.16248361991338578	36.17214736344045
GOTERM_CC_FAT	GO:0000794~condensed nuclear chromosome	9	1.0262257696693273	2.9035444302281157E-4	RPA1, NEK2, SGOL2, INCENP, SGOL1, BUB1, TOPBP1, NCAPD3, RAD51	522	42	12504	5.1330049261083746	0.09032627972667129	0.0028646554735934915	0.3922018235297031
GOTERM_CC_FAT	GO:0005876~spindle microtubule	8	0.9122006841505131	2.829811014462767E-6	FAM33A, SPAG5, F630043A04RIK, TPX2, KIF18A, NUSAP1, BIRC5, SKA1	522	17	12504	11.272481406355645	9.220943055364694E-4	4.855248950086377E-5	0.0038293129240529744
GOTERM_CC_FAT	GO:0022626~cytosolic ribosome	8	0.9122006841505131	4.464850944824909E-6	RPL19, GM6636, GM12034, GM5621, GM7618, GM10059, GM5451, GM5908, GM9091, GM13841, GM14586, GM7079, RPL29, RPS19, RPS29, GM4167, GM14072, GM14044, GM14303	522	18	12504	10.646232439335886	0.0014544858660625604	6.930924835635288E-5	0.006041794371602904
GOTERM_CC_FAT	GO:0015935~small ribosomal subunit	8	0.9122006841505131	1.4685152058482057E-4	RPSA, GM6636, GM12034, GM5786, GM15450, GM9083, GM8731, GM7618, GM10059, RPS2, GM9091, GM14586, GM7079, RPS19, RPS29, RPS16, NPM1, GM14072, GM14303	522	29	12504	6.608006341656757	0.04674907626743374	0.00159463092984502	0.19854089749001824
GOTERM_CC_FAT	GO:0005901~caveola	7	0.798175598631699	8.747067894958866E-4	CAV1, SORBS1, NRM, SDPR, TUBB5, KIF18A, SCARB1	522	28	12504	5.988505747126436	0.24819567830066536	0.008117706286908555	1.1772121101183752
GOTERM_CC_FAT	GO:0034399~nuclear periphery	7	0.798175598631699	0.015555940130387965	LMNB1, NRM, PCNA, POLA1, CENPF, TGFB1I1, LBR	522	49	12504	3.4220032840722494	0.9939705187427101	0.09535939461124199	19.11662724342409
GOTERM_CC_FAT	GO:0000792~heterochromatin	7	0.798175598631699	0.018692619634811194	ZFP57, INCENP, H2AFY2, SUV39H1, DNMT1, H2AFX, HELLS	522	51	12504	3.2878070768537304	0.9978696486110266	0.11156826680181942	22.535306152609824
GOTERM_CC_FAT	GO:0005924~cell-substrate adherens junction	7	0.798175598631699	0.04084076446964703	JUB, SORBS1, EVL, ZYX, TGFB1I1, NEXN, RHOU	522	61	12504	2.748822310156397	0.9999987515464243	0.19688044615633848	43.12256914355723
GOTERM_CC_FAT	GO:0030055~cell-substrate junction	7	0.798175598631699	0.056337322495242134	JUB, SORBS1, EVL, ZYX, TGFB1I1, NEXN, RHOU	522	66	12504	2.5405781957506095	0.9999999938302172	0.25235323315654323	54.37388605983524
GOTERM_CC_FAT	GO:0005604~basement membrane	7	0.798175598631699	0.08324226272487777	FBLN1, NTN4, COL2A1, NID1, ADAMTS1, NID2, TIMP1	522	73	12504	2.2969611084868524	0.9999999999995045	0.32167428806021847	69.15261986854354
GOTERM_CC_FAT	GO:0000940~outer kinetochore of condensed chromosome	6	0.6841505131128849	6.2165804919185585E-6	FAM33A, CCDC99, F630043A04RIK, BUB1B, CENPF, SKA1	522	8	12504	17.96551724137931	0.002024559349073196	8.810966331884718E-5	0.008412126008949805
GOTERM_CC_FAT	GO:0043601~nuclear replisome	6	0.6841505131128849	1.3507486419835171E-5	RPA1, PRIM1, RPA2, PRIM2, POLA1, POLA2	522	9	12504	15.969348659003831	0.004393789252736924	1.7612330098348838E-4	0.01827716813682656
GOTERM_CC_FAT	GO:0030894~replisome	6	0.6841505131128849	1.3507486419835171E-5	RPA1, PRIM1, RPA2, PRIM2, POLA1, POLA2	522	9	12504	15.969348659003831	0.004393789252736924	1.7612330098348838E-4	0.01827716813682656
GOTERM_CC_FAT	GO:0043596~nuclear replication fork	6	0.6841505131128849	2.608915683304069E-5	RPA1, PRIM1, RPA2, PRIM2, POLA1, POLA2	522	10	12504	14.37241379310345	0.008469109388050788	3.2706865809162267E-4	0.03529881879279495
GOTERM_CC_FAT	GO:0045120~pronucleus	6	0.6841505131128849	6.719533169891965E-4	BLM, RIF1, EZH2, CENPF, CCNA2, NCAPD2	522	18	12504	7.984674329501916	0.19678303804044606	0.0064242875827404955	0.9054875458512579
GOTERM_CC_FAT	GO:0043073~germ cell nucleus	6	0.6841505131128849	0.001799119241954053	RPA1, BLM, H2AFX, TOPBP1, MARCKS, TRIP13	522	22	12504	6.532915360501567	0.4440300927480866	0.015329735059485872	2.4073615298540907
GOTERM_CC_FAT	GO:0000922~spindle pole	6	0.6841505131128849	0.002221147666656875	CCDC99, MAD2L1, NEK2, DLGAP5, CENPF, ASPM	522	23	12504	6.24887556221889	0.51562675014973	0.017959262529562814	2.964241667273426
GOTERM_CC_FAT	GO:0000790~nuclear chromatin	6	0.6841505131128849	0.07808959127656738	ZFP57, H2AFY2, SUV39H1, TIPIN, H2AFX, CITED2	522	55	12504	2.613166144200627	0.9999999999969202	0.3115593442015018	66.72196423745902
GOTERM_CC_FAT	GO:0005643~nuclear pore	6	0.6841505131128849	0.0985292902293066	TMEM48, GM10184, IPO5, GM10259, GM8129, NUP37, NUP85, RPL38, KPNA2, KPNB1	522	59	12504	2.4360023378141435	0.9999999999999979	0.3629262513581877	75.4307159067842
GOTERM_CC_FAT	GO:0001673~male germ cell nucleus	5	0.5701254275940707	0.005719883094344652	RPA1, BLM, H2AFX, TOPBP1, TRIP13	522	18	12504	6.653895274584929	0.8458817622003705	0.03983769296561945	7.468892664323878
GOTERM_CC_FAT	GO:0015030~Cajal body	5	0.5701254275940707	0.027591088534629396	GAR1, OIP5, GEMIN6, NHP2, FBL	522	28	12504	4.277504105090311	0.999890667004746	0.1455186116574767	31.51928844778641
GOTERM_CC_FAT	GO:0031965~nuclear membrane	5	0.5701254275940707	0.07210614672607071	LMNB1, NRM, PCNA, NUP85, LBR	522	38	12504	3.1518451300665453	0.9999999999746227	0.3014732919931664	63.6773343542598
GOTERM_CC_FAT	GO:0015934~large ribosomal subunit	5	0.5701254275940707	0.07782801493135483	RPL17, RPL19, GM5621, NPM1, GM4167, GM5451	522	39	12504	3.0710285882699675	0.9999999999966218	0.31431585782823357	66.59396397752472
GOTERM_CC_FAT	GO:0031262~Ndc80 complex	4	0.45610034207525657	2.788141175866059E-4	SPC24, SPC25, NUF2, NDC80	522	4	12504	23.95402298850575	0.0868965306800249	0.002836783574691415	0.3766407321065812
GOTERM_CC_FAT	GO:0005658~alpha DNA polymerase:primase complex	4	0.45610034207525657	2.788141175866059E-4	PRIM1, PRIM2, POLA1, POLA2	522	4	12504	23.95402298850575	0.0868965306800249	0.002836783574691415	0.3766407321065812
GOTERM_CC_FAT	GO:0005652~nuclear lamina	4	0.45610034207525657	0.003442628197321257	LMNB1, NRM, PCNA, LBR	522	8	12504	11.977011494252874	0.6750984490843973	0.02580613484851424	4.55948379926987
GOTERM_CC_FAT	GO:0000307~cyclin-dependent protein kinase holoenzyme complex	4	0.45610034207525657	0.005005149895219449	CCNE1, CCND1, PCNA, CDK2	522	9	12504	10.646232439335886	0.8051988416030871	0.0364941561703076	6.564720122286238
GOTERM_CC_FAT	GO:0030496~midbody	4	0.45610034207525657	0.01194121081584008	NEK2, INCENP, BIRC5, AURKB	522	12	12504	7.984674329501916	0.9800846404608989	0.07681326818482215	15.003866228501062
GOTERM_CC_FAT	GO:0005637~nuclear inner membrane	4	0.45610034207525657	0.02251130305166346	LMNB1, NRM, PCNA, LBR	522	15	12504	6.387739463601533	0.9994023752054881	0.1284260658675338	26.516589013561898
GOTERM_CC_FAT	GO:0005732~small nucleolar ribonucleoprotein complex	4	0.45610034207525657	0.026867507647667474	GAR1, NOP58, NHP2, SNORA64	522	16	12504	5.988505747126437	0.9998606639772101	0.1442399865010744	30.82649526403064
GOTERM_CC_FAT	GO:0005581~collagen	4	0.45610034207525657	0.04241341872229592	COL2A1, LOX, COL11A1, COL5A2	522	19	12504	5.042952208106472	0.9999992687854306	0.19808986834077857	44.37166818545876
GOTERM_CC_FAT	GO:0005814~centriole	4	0.45610034207525657	0.0686597831343099	PLK4, CEP192, BIRC5, CEP55	522	23	12504	4.16591704147926	0.9999999999150185	0.2925570737897899	61.808607663566384
GOTERM_CC_FAT	GO:0005663~DNA replication factor C complex	3	0.34207525655644244	0.009830933595066368	RFC5, RFC4, RFC2	522	4	12504	17.96551724137931	0.9600745721931296	0.06489718105342646	12.514160403816232
GOTERM_CC_FAT	GO:0000444~MIS12/MIND type complex	3	0.34207525655644244	0.009830933595066368	DSN1, NSL1, PMF1	522	4	12504	17.96551724137931	0.9600745721931296	0.06489718105342646	12.514160403816232
GOTERM_CC_FAT	GO:0022627~cytosolic small ribosomal subunit	3	0.34207525655644244	0.023247400630144303	GM12034, GM6636, RPS19, RPS29, GM7618, GM10059, GM9091, GM14072, GM14586, GM7079, GM14303	522	6	12504	11.977011494252874	0.9995325107111236	0.13013793021699072	27.261897152155502
GOTERM_CC_FAT	GO:0022625~cytosolic large ribosomal subunit	3	0.34207525655644244	0.03165833793441852	RPL19, GM5621, GM4167, GM5451	522	7	12504	10.266009852216747	0.9999721176565314	0.16285210207198664	35.29538265295057
GOTERM_CC_FAT	GO:0005721~centromeric heterochromatin	3	0.34207525655644244	0.03165833793441852	INCENP, DNMT1, HELLS	522	7	12504	10.266009852216747	0.9999721176565314	0.16285210207198664	35.29538265295057
GOTERM_CC_FAT	GO:0000780~condensed nuclear chromosome, centromeric region	3	0.34207525655644244	0.03165833793441852	SGOL2, SGOL1, BUB1	522	7	12504	10.266009852216747	0.9999721176565314	0.16285210207198664	35.29538265295057
GOTERM_CC_FAT	GO:0070652~HAUS complex	3	0.34207525655644244	0.041063574513715735	HAUS4, HAUS5, HAUS1	522	8	12504	8.982758620689655	0.9999988426094465	0.19504885449329556	43.301104029590896
GOTERM_CC_FAT	GO:0016600~flotillin complex	3	0.34207525655644244	0.06247477145854806	SORBS1, NRM, TUBB5	522	10	12504	7.186206896551725	0.9999999992647314	0.27286873500332764	58.2299030492352
GOTERM_CC_FAT	GO:0000178~exosome (RNase complex)	3	0.34207525655644244	0.08677792552812098	DIS3, EXOSC8, EXOSC2	522	12	12504	5.988505747126437	0.9999999999998594	0.3296168918080161	70.72420944432073
GOTERM_CC_FAT	GO:0005862~muscle thin filament tropomyosin	2	0.22805017103762829	0.08160041589792037	TPM2, TPM1	522	2	12504	23.95402298850575	0.9999999999991122	0.3198328470260501	68.39657529539971
GOTERM_CC_FAT	GO:0030892~mitotic cohesin complex	2	0.22805017103762829	0.08160041589792037	SGOL2, SGOL1	522	2	12504	23.95402298850575	0.9999999999991122	0.3198328470260501	68.39657529539971
GOTERM_CC_FAT	GO:0032133~chromosome passenger complex	2	0.22805017103762829	0.08160041589792037	CDCA8, BIRC5	522	2	12504	23.95402298850575	0.9999999999991122	0.3198328470260501	68.39657529539971

## Sheet: KEGG-Up in dense
Category	Term	Count	%	PValue	Genes	List Total	Pop Hits	Pop Total	Fold Enrichment	Bonferroni	Benjamini	FDR
KEGG_PATHWAY	mmu05200:Pathways in cancer	22	3.5313001605136436	0.003130342470985515	CEBPA, EGFR, AR, FGF8, WNT5B, APC2, TGFB3, STAT1, KITL, MMP2, RALGDS, ACVR1B, CDKN1A, LAMA4, CDKN2A, CDKN2B, PDGFRA, FLT3L, WNT9A, AXIN2, ITGA2B, PIK3R2	197	323	5738	1.9838757838160643	0.36131319040308396	0.1060319722984272	3.644951106374039
KEGG_PATHWAY	mmu04510:Focal adhesion	14	2.247191011235955	0.017441673820316302	EGFR, VAV3, COL3A1, LAMA4, ITGB8, ITGA7, COL6A2, PDGFRA, COL6A1, THBS2, MYLK, ITGA2B, SPP1, PIK3R2	197	198	5738	2.0594780290211765	0.9192313825122554	0.3019415203858675	18.810325294431042
KEGG_PATHWAY	mmu04360:Axon guidance	12	1.9261637239165328	0.004929177164832301	SEMA5A, PLXNA3, EPHB6, SEMA6C, RGS3, ROBO1, SEMA4C, SEMA4B, NFATC4, SEMA3B, PPP3CA, NTN1	197	131	5738	2.66811330259232	0.5066889075490193	0.1317912144999278	5.684058572823392
KEGG_PATHWAY	mmu04142:Lysosome	11	1.7656500802568218	0.007191308843379506	TCIRG1, LAPTM4B, HEXA, HEXB, NAGA, ARSA, GAA, CTNS, CTSH, DNASE2A, CTSF	197	119	5738	2.692402849464659	0.6437322075370453	0.1580310154041702	8.192248473544407
KEGG_PATHWAY	mmu04062:Chemokine signaling pathway	11	1.7656500802568218	0.09255440602020949	GNG8, VAV3, ARRB1, GNB5, FOXO3, CX3CL1, CCL5, STAT1, PIK3R2, STAT2, CXCL10	197	182	5738	1.7604172477268925	0.999999070294775	0.5006359615150405	68.3426380199943
KEGG_PATHWAY	mmu04512:ECM-receptor interaction	10	1.6051364365971106	0.0019432192583561836	LAMA4, ITGB8, ITGA7, COL3A1, COL6A2, COL6A1, AGRN, THBS2, ITGA2B, SPP1	197	83	5738	3.5092654883493366	0.24281729107356298	0.08854850292440786	2.277239004109921
KEGG_PATHWAY	mmu04623:Cytosolic DNA-sensing pathway	9	1.4446227929373996	4.92191863025817E-4	DDX58, IKBKE, TMEM173, IRF7, POLR3GL, IL33, CCL5, ZBP1, CXCL10	197	55	5738	4.766220581449008	0.06797977433588576	0.06797977433588576	0.5813436377432146
KEGG_PATHWAY	mmu05210:Colorectal cancer	8	1.2841091492776886	0.026939095394984024	EGFR, ACVR1B, APC2, TGFB3, PDGFRA, AXIN2, RALGDS, PIK3R2	197	86	5738	2.7094794003069294	0.979861671425453	0.38623385712613256	27.632458002869974
KEGG_PATHWAY	mmu04620:Toll-like receptor signaling pathway	8	1.2841091492776886	0.051773466335572976	IKBKE, IRF7, LBP, CCL5, STAT1, PIK3R2, CXCL10, SPP1	197	99	5738	2.353689176024201	0.9995006203534637	0.5324338269683193	46.71892228971781
KEGG_PATHWAY	mmu05212:Pancreatic cancer	7	1.1235955056179776	0.03556309508701589	EGFR, ACVR1B, CDKN2A, TGFB3, STAT1, RALGDS, PIK3R2	197	72	5738	2.8317822899041176	0.994361593923089	0.4374922849320133	34.873630168153845
KEGG_PATHWAY	mmu04662:B cell receptor signaling pathway	7	1.1235955056179776	0.054848790373920306	VAV3, IFITM1, NFKBIE, NFATC4, PPP3CA, BLNK, PIK3R2	197	80	5738	2.5486040609137057	0.999686176752511	0.5196953088960904	48.72980524790891
KEGG_PATHWAY	mmu04640:Hematopoietic cell lineage	7	1.1235955056179776	0.06647482298289653	GM13305, GM2002, IL11RA1, MME, FLT3L, KITL, ITGA2B, IL6RA	197	84	5738	2.427241962774958	0.9999465407272022	0.5307693328598104	55.720117414844836
KEGG_PATHWAY	mmu04350:TGF-beta signaling pathway	7	1.1235955056179776	0.07607115139439824	ACVR1B, CDKN2B, GDF6, GDF5, TGFB3, THBS2, CHRD	197	87	5738	2.34354396405858	0.9999878014150297	0.5069461651572287	60.82026607971994
KEGG_PATHWAY	mmu05214:Glioma	6	0.9630818619582664	0.06653989920038164	EGFR, CDKN1A, CDKN2A, PDGFRA, CAMK2B, PIK3R2	197	64	5738	2.7306472081218276	0.9999470710100341	0.5050634310672393	55.75665969438444
KEGG_PATHWAY	mmu00980:Metabolism of xenobiotics by cytochrome P450	6	0.9630818619582664	0.07393234943349797	GSTM1, GSTM2, GSTA4, EPHX1, ALDH3A1, GSTM7	197	66	5738	2.6479003230272267	0.9999830211584522	0.5191674380797437	59.732568493067895
KEGG_PATHWAY	mmu04622:RIG-I-like receptor signaling pathway	6	0.9630818619582664	0.08175476096772134	DDX58, IKBKE, TMEM173, ISG15, IRF7, CXCL10	197	68	5738	2.57002090176172	0.9999949523179226	0.5120029730999117	63.58129893360025
KEGG_PATHWAY	mmu04115:p53 signaling pathway	6	0.9630818619582664	0.08582523488614438	CDKN1A, CDKN2A, CD82, CCNG2, SESN1, SESN3	197	69	5738	2.5327742220260427	0.9999973258871823	0.509771141281977	65.44792398007515
KEGG_PATHWAY	mmu05218:Melanoma	6	0.9630818619582664	0.09427982442653346	EGFR, CDKN1A, FGF8, CDKN2A, PDGFRA, PIK3R2	197	71	5738	2.461428469292915	0.9999992918128916	0.49049329270691133	69.04819745459274
KEGG_PATHWAY	mmu00603:Glycosphingolipid biosynthesis	5	0.8025682182985553	0.0010095372536535695	ST3GAL1, A4GALT, HEXA, HEXB, NAGA	197	14	5738	10.402465554749817	0.1344903429724872	0.06967228514489976	1.1890600806779061
KEGG_PATHWAY	mmu00520:Amino sugar and nucleotide sugar metabolism	5	0.8025682182985553	0.061997440789711394	AMDHD2, GNPDA1, GNPDA2, GM8615, HEXA, HEXB	197	44	5738	3.309875403784033	0.9998940318552554	0.5335934821289219	53.138540942750176
KEGG_PATHWAY	mmu00604:Glycosphingolipid biosynthesis	3	0.4815409309791332	0.0910898927009915	ST3GAL1, HEXA, HEXB	197	15	5738	5.825380710659899	0.9999988291711749	0.5126786457602178	67.73224737510401

## Sheet: KEGG-down in dense
Category	Term	Count	%	PValue	Genes	List Total	Pop Hits	Pop Total	Fold Enrichment	Bonferroni	Benjamini	FDR
KEGG_PATHWAY	mmu04110:Cell cycle	33	5.205047318611988	7.756820431694925E-20	DBF4, PKMYT1, TTK, CHEK1, CCNE2, CCNE1, CDC45, MCM7, BUB1, GM5593, CCNA2, MYC, TFDP1, CDC7, CDC6, CDK1, RBL1, SKP2, ESPL1, CDC20, MCM2, MCM3, MCM4, GM9430, CDC25A, CDK2, WEE1, MCM5, MCM6, CCNB1, MAD2L1, PLK1, GADD45G, PCNA, BUB1B	197	128	5738	7.509279822335025	8.532502474864418E-18	4.266251237432209E-18	8.763849158385553E-17
KEGG_PATHWAY	mmu03030:DNA replication	25	3.943217665615142	4.586309432066935E-28	POLA1, POLA2, RPA1, PRIM1, RPA2, MCM7, POLE2, PRIM2, FEN1, LIG1, POLE, MCM2, MCM3, MCM4, RNASEH2B, MCM5, MCM6, RFC5, POLD3, DNA2, RFC3, RFC4, POLD1, POLD2, PCNA	197	35	5738	20.804931109499638	5.044940375273628E-26	5.044940375273628E-26	5.181726766818152E-25
KEGG_PATHWAY	mmu00240:Pyrimidine metabolism	22	3.4700315457413247	4.578548488975398E-12	POLR3G, DCTD, GM6091, CTPS, POLE, POLA1, DCK, CAD, POLA2, TK1, POLD3, PRIM1, TYMS, UMPS, POLE2, NME1, RRM2, POLD1, PRIM2, RRM1, POLD2, TXNRD1, DUT	197	96	5738	6.674915397631134	5.03641572890956E-10	1.6788048728955118E-10	5.172973160938454E-9
KEGG_PATHWAY	mmu00230:Purine metabolism	18	2.8391167192429023	2.127807854394468E-5	POLR3G, POLE, DCK, POLA1, POLA2, PPAT, POLD3, PRIM1, POLE2, ATIC, NME1, RRM2, POLD1, PRIM2, PDE5A, POLD2, RRM1, PRPS1	197	157	5738	3.3393902163018523	0.0023378764418356957	2.3403396395804688E-4	0.024037869970561232
KEGG_PATHWAY	mmu04114:Oocyte meiosis	15	2.365930599369085	3.154495141829637E-5	CDK1, SGOL1, PKMYT1, CDC20, AURKA, ESPL1, CDK2, CCNE2, CCNB1, CCNE1, MAD2L1, PLK1, RPS6KA2, BUB1, FBXO5, GM5593	197	115	5738	3.7991613330390646	0.0034639858965260784	3.1540473917168743E-4	0.03563448431646021
KEGG_PATHWAY	mmu04115:p53 signaling pathway	14	2.2082018927444795	4.1611246980787074E-7	CDK1, CYCS, GM10053, GM10108, CHEK1, CDK2, GTSE1, CCNE2, CCNB1, CCNE1, SIAH1B, RRM2, SERPINE1, GADD45G, GM5593, PERP, THBS1	197	69	5738	5.909806518060766	4.577133366334696E-5	6.538890221730043E-6	4.701332378287404E-4
KEGG_PATHWAY	mmu03440:Homologous recombination	13	2.050473186119874	2.0034537560162145E-11	XRCC2, BLM, MRE11A, EME1, BRCA2, RAD54L, RAD51, RPA1, POLD3, RPA2, POLD1, POLD2, RAD54B	197	27	5738	14.024064673810868	2.203798254996059E-9	5.509495082378635E-10	2.2635515684044094E-8
KEGG_PATHWAY	mmu03430:Mismatch repair	12	1.8927444794952681	2.840605536070273E-11	POLD3, RFC5, EXO1, RPA1, RPA2, RFC3, RFC4, POLD1, LIG1, POLD2, PCNA, PMS2	197	22	5738	15.88740193816336	3.124666081433247E-9	6.249332162866494E-10	3.209387200442393E-8
KEGG_PATHWAY	mmu03420:Nucleotide excision repair	12	1.8927444794952681	1.2331306384175774E-7	POLD3, RFC5, RPA1, RPA2, RFC3, RFC4, POLE2, POLD1, LIG1, POLD2, POLE, PCNA	197	43	5738	8.128438200920789	1.3564345865635374E-5	2.26073708819996E-6	1.393220862011546E-4
KEGG_PATHWAY	mmu03410:Base excision repair	10	1.5772870662460567	5.750008874532314E-6	POLD3, POLE2, NEIL3, UNG, POLD1, LIG1, POLD2, POLE, PCNA, FEN1	197	40	5738	7.281725888324873	6.323028069171732E-4	7.027561884664912E-5	0.006496311074577488
KEGG_PATHWAY	mmu04914:Progesterone-mediated oocyte maturation	10	1.5772870662460567	0.002295449359811883	CCNB1, CDK1, MAD2L1, PLK1, RPS6KA2, BUB1, GM5593, PKMYT1, CCNA2, CDC25A, CDK2	197	85	5738	3.426694535682293	0.22336878934656146	0.020845471928325754	2.5630194851304244
KEGG_PATHWAY	mmu00670:One carbon pool by folate	8	1.2618296529968454	4.2966730719602035E-7	MTHFD1, MTHFD2, SHMT1, TYMS, SHMT2, DHFR, ATIC, MTHFD1L	197	16	5738	14.563451776649744	4.726229704576923E-5	5.907909291114066E-6	4.8544776440895276E-4
KEGG_PATHWAY	mmu05222:Small cell lung cancer	7	1.1041009463722398	0.06959019830690498	CCNE2, CCNE1, CKS1B, CYCS, SKP2, GM10108, GM10053, MYC, CDK2	197	85	5738	2.3986861749776054	0.999641762978724	0.4107792521008219	55.73360355097504
KEGG_PATHWAY	mmu03018:RNA degradation	6	0.9463722397476341	0.053061650086411394	DIS3, EXOSC8, EXOSC2, HSPD1, GM10043, GM12571	197	60	5738	2.9126903553299495	0.9975146498291901	0.34843723713102825	45.989683514769986
KEGG_PATHWAY	mmu00260:Glycine, serine and threonine metabolism	5	0.7886435331230284	0.022466008132404052	SHMT1, SHMT2, PHGDH, PSPH, PSAT1, GM7901	197	32	5738	4.551078680203045	0.9178693065705215	0.17491171226595936	22.641616722167978

[truncated: 2 more sheets: KEGG-Up in spheres, KEGG-Down in spheres]
